# Supplementary material for: Synthesis of ([1,2,4]triazolo[4,3-a]pyridin-3-ylmethyl)phosphonates and their benzo derivatives via 5-exo-dig cyclization
Source: publisher site journal article supplement (doi:10.3762/bjoc.15.159), 2019-07-12

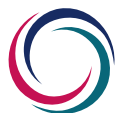

## Supporting Information

for

### **Synthesis of ([1,2,4]triazolo[4,3-*a*]pyridin-3-ylmethyl)phosphonates and their benzo derivatives via 5-*exo-dig* cyclization**

Aleksandr S. Krylov, Artem A. Petrosian, Julia L. Pterskaya, Nataly I. Svintsitskaya and Albina V. Dogadina

*Beilstein J. Org. Chem.* **2019**, *15*, 1563–1568. doi:10.3762/bjoc.15.159

### **Experimental procedures, characterization data, and copies of $^1\text{H}$ , $^{13}\text{C}$ , and $^{31}\text{P}$ NMR spectra for obtained compounds**

## List of Contents

|                                    |     |
|------------------------------------|-----|
| <b>A. General Methods</b> .....    | S2  |
| <b>B. General Procedures</b> ..... | S2  |
| <b>C. References</b> .....         | S2  |
| <b>D. Analytical Data</b> .....    | S2  |
| <b>E. NMR Spectra</b> .....        | S10 |

## A. General Methods

All reactions were carried out under an inert atmosphere of argon in oven dried glassware with magnetic stirring, unless otherwise noted. All chemicals were purchased from were obtained from commercial suppliers and used without further purification. Column chromatography purifications were performed using Merck silica gel 60. Commercial grade solvents and reagents were used without further purification. Analytical thin layer chromatography (TLC) was performed using Merck 60 F254 silica gel plate. Subsequent to elution, plates were visualized using UV radiation (254 nm). Melting points were uncorrected and were recorded on a Kofler hot-stage (VEB Wägetechnik Rapido, PHMK 81/2969).  $^1\text{H}$ ,  $^{13}\text{C}$ ,  $^{15}\text{N}$  and  $^{31}\text{P}$  NMR spectra were registered at 400.13, 100.61, 41.50 and 161.98 MHz, respectively, using a Bruker Avance 400 spectrometer. Residual solvent peaks were used as reference. IR spectra were registered on an IRPrestige-21 (Shimadzu) instrument from KBr pellets. HRMS (ESI) analysis was performed on a Bruker micrOTOF mass spectrometer. The X-ray crystal structures were detected on single crystal diffractometers Agilent Technologies (Oxford Diffraction) «Supernova» and «Xcalibur».

**B. Typical experimental procedure for the synthesis of dialkyl 2-chloroethynylphosphonates.**<sup>[1,2]</sup> In a 250 ml round-bottomed flask equipped with an efficient stirrer, thermometer, and reflux condenser a mixture of sodium hydroxide (3 mol), water (150 ml) and benzyltriethylammonium chloride (2 g) was heated with stirring on an oil bath up to 120 °C. Then, 10 ml of diethyl ether and a solution of trichloroethylene (1 mol) in 100 ml of diethyl ether were added dropwise. Simultaneously the reaction product was distilled off. The distillate consists mainly of the solution of dichloroacetylene in ether. The distillate was dried over calcium chloride, and then over sodium metal. Yield 60%. Trialkylphosphite (0.6 mol) was added dropwise with stirring at 5–20 °C to ether solution of dichloroacetylene obtained. The reaction mixture was kept overnight. Then, diethyl ether was distilled off. The residue was distilled in vacuum (1 mm Hg), collecting the fraction bp 52–60 °C. Yield 68–72%.

**Typical experimental procedure for the synthesis of compounds 3-8, 13 and 14.** The corresponding 2-hydrazinylpyridines **1a–f,g,h** (1 mmol) was added to a mixture of dialkyl chloroacetylenephosphonate **2a–c** (1 mmol) and  $\text{K}_2\text{CO}_3$  (1 mmol) in 5 mL of anhydrous acetonitrile at room temperature. The mixture was stirred at room temperature until the starting chloroethynylphosphonate consumed (monitoring with  $^{31}\text{P}$  NMR). After the reaction was completed, the reaction mixture was filtered and evaporated. The oily residue was chromatographed on  $\text{SiO}_2$  eluting with 1% MeOH in  $\text{CHCl}_3$ .

**Typical experimental procedure for the synthesis of compounds 10-12.** The corresponding 2-hydrazinylpyridines **1i,j** (1 mmol) was added to a mixture of dialkyl chloroacetylenephosphonate **2a,b** (1 mmol) in 5 mL of anhydrous acetonitrile at room temperature. The mixture was stirred (at 60°C for **10**; at reflux for **11** and **12**) until the starting chloroethynylphosphonate consumed (monitoring with  $^{31}\text{P}$  NMR). After the reaction was completed, the reaction mixture was filtered and evaporated. The oily residue was chromatographed on  $\text{SiO}_2$  eluting with 1% MeOH in  $\text{CHCl}_3$ .

## C. References

1. Ionin, B. I.; Petrov, A. A. *Zh. Obshch. Khim.* **1965**, 35, 1917–1921.
2. Pielichowski, J.; Popielarz, R. *Synthesis (Stuttg)*. **1984**, 05, 433–434.

## D. Analytical Data

**Dimethyl ([1,2,4]triazolo[4,3-a]pyridin-3-ylmethyl)phosphonate 3a**

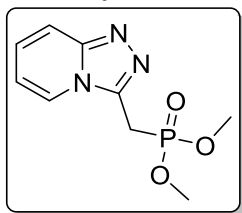

Following the general procedure, **3a** was obtained from **1a** and **2a** as pale yellow oil.  $^1\text{H}$  NMR (400 MHz,  $\text{CDCl}_3$ )  $\delta$  8.23 (d,  $J = 7.0$  Hz, 1H, 5- $\text{H}_{\text{ar}}$ ), 7.72 (d,  $J = 9.3$  Hz, 1H, 8- $\text{H}_{\text{ar}}$ ), 7.39 – 7.17 (m, 1H, 7- $\text{H}_{\text{ar}}$ ), 6.87 (m, 1H, 6- $\text{H}_{\text{ar}}$ ), 3.78 (d,  $^2J_{\text{HP}} = 21.5$  Hz, 2H,  $\text{CH}_2$ ), 3.73 (d,  $^3J_{\text{HP}} = 11.1$  Hz, 6H,  $2\text{CH}_3$ ).  $^{13}\text{C}$  NMR (101 MHz,  $\text{CDCl}_3$ )  $\delta$  150.5, 138.8 (d,  $^2J_{\text{CP}} = 10.0$  Hz), 127.2, 123.2, 116.3, 113.8, 53.4 (d,  $^2J_{\text{CP}} = 6.8$  Hz), 23.4 (d,  $^1J_{\text{CP}} = 143.0$  Hz).  $^{31}\text{P}$  NMR (162 MHz,  $\text{CDCl}_3$ )  $\delta$  22.85.  $\nu_{\text{max}}(\text{KBr})/\text{cm}^{-1}$  1433, 2951, 1637, 1510, 1388, 1251, 1238, 1188, 1043, 1012, 871, 814, 738. HRMS-ESI ( $m/z$ ): calcd for  $\text{C}_9\text{H}_{12}\text{N}_3\text{O}_3\text{P}$ ,  $[\text{M}+\text{H}]^+$ : 242.0689, found 242.0694.

#### Diisopropyl ([1,2,4]triazolo[4,3-a]pyridin-3-ylmethyl)phosphonate **3b**

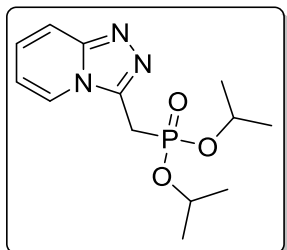

Following the general procedure, **3b** was obtained from **1a** and **2b** as pale yellow oil.  $^1\text{H}$  NMR (400 MHz,  $\text{CDCl}_3$ )  $\delta$  8.05 (d,  $^3J_{\text{HH}} = 9.3$  Hz, 1H, 5- $\text{H}_{\text{ar}}$ ), 7.38 (d,  $^3J_{\text{HH}} = 9.3$  Hz, 1H, 8- $\text{H}_{\text{ar}}$ ), 7.03 – 6.88 (m, 1H, 7- $\text{H}_{\text{ar}}$ ), 6.56 (m, 1H, 6- $\text{H}_{\text{ar}}$ ), 4.34 (m,  $^3J_{\text{HP}} = 12.6$  Hz,  $^3J_{\text{HH}} = 6.2$  Hz, 2H,  $2\text{CH}$ ), 3.47 (d,  $^3J_{\text{HP}} = 20.3$  Hz, 2H,  $\text{CH}_2$ ), 0.96 (d,  $^3J_{\text{HH}} = 6.2$  Hz, 6H,  $2\text{CH}_3$ ), 0.92 (d,  $^3J_{\text{HH}} = 6.2$  Hz, 6H,  $2\text{CH}_3$ ).  $^{13}\text{C}$  NMR (101 MHz,  $\text{CDCl}_3$ )  $\delta$  150.1, 139.2 (d,  $^2J_{\text{CP}} = 9.9$  Hz), 126.9, 123.6, 115.6, 113.1, 71.6 (d,  $^2J_{\text{CP}} = 6.9$  Hz), 25.1 (d,  $^1J_{\text{CP}} = 143.3$  Hz), 23.7 (d,  $^3J_{\text{CP}} = 3.9$  Hz), 23.5 (d,  $^3J_{\text{CP}} = 4.9$  Hz).  $^{31}\text{P}$  NMR (162 MHz,  $\text{CDCl}_3$ )  $\delta$  18.40.  $\nu_{\text{max}}(\text{KBr})/\text{cm}^{-1}$  3461, 2981, 1637, 1507, 1387, 1376, 1251, 1105, 988, 759. HRMS-ESI ( $m/z$ ): calcd for  $\text{C}_{13}\text{H}_{20}\text{N}_3\text{O}_3\text{P}$ ,  $[\text{M}+\text{H}]^+$ : 298.1315, found 298.1301.

#### Dimethyl ((8-chloro-[1,2,4]triazolo[4,3-a]pyridin-3-yl)methyl)phosphonate **4a**

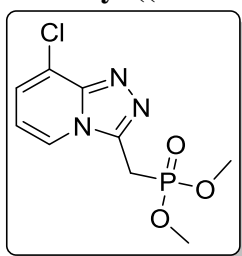

Following the general procedure, **4a** was obtained from **1b** and **2a** as pale solid.  $^1\text{H}$  NMR (400 MHz,  $\text{CDCl}_3$ )  $\delta$  8.24 (d,  $^3J_{\text{HH}} = 7.0$  Hz, 1H, 5- $\text{H}_{\text{ar}}$ ), 7.34 (d,  $^3J_{\text{HH}} = 7.1$  Hz, 1H, 7- $\text{H}_{\text{ar}}$ ), 6.85 (t,  $^3J_{\text{HH}} = 7.0$  Hz, 1H, 6- $\text{H}_{\text{ar}}$ ), 3.81 (d,  $J = 20.6$  Hz, 2H,  $\text{CH}_2$ ), 3.76 (d,  $^3J_{\text{HP}} = 11.0$  Hz, 6H,  $2\text{OCH}_3$ ).  $^{13}\text{C}$  NMR (101 MHz,  $\text{CDCl}_3$ )  $\delta$  148.7, 140.5 (d,  $^2J_{\text{CP}} = 10.1$  Hz), 126.1, 122.5, 122.1, 113.7, 53.5 (d,  $^2J_{\text{CP}} = 6.7$  Hz), 23.7 (d,  $^1J_{\text{CP}} = 142.6$  Hz).  $^{31}\text{P}$  NMR (162 MHz,  $\text{CDCl}_3$ )  $\delta$  22.33.  $\nu_{\text{max}}(\text{KBr})/\text{cm}^{-1}$  3434, 2952, 1630, 1506, 1383, 1321, 1263, 1239, 1041, 1026, 1009, 945, 865, 818. HRMS-ESI ( $m/z$ ): calcd for  $\text{C}_9\text{H}_9\text{ClN}_3\text{O}_3\text{P}$ ,  $[\text{M}+\text{Na}]^+$ : 298.0119, found 298.0132. M. p. 155 – 160  $^{\circ}\text{C}$ .

#### Diisopropyl ((8-chloro-[1,2,4]triazolo[4,3-a]pyridin-3-yl)methyl)phosphonate **4b**

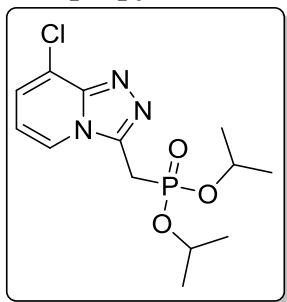

Following the general procedure, **4b** was obtained from **1b** and **2b** as pale yellow oil.  $^1\text{H}$  NMR (400 MHz,  $\text{CDCl}_3$ )  $\delta$  8.13 (d,  $^3J_{\text{HH}} = 6.9$  Hz, 1H, 5- $\text{H}_{\text{ar}}$ ), 7.14 (d,  $^3J_{\text{HH}} = 7.1$  Hz, 1H, 7- $\text{H}_{\text{ar}}$ ), 6.66 (t,  $^3J_{\text{HH}} = 7.0$  Hz, 1H, 6- $\text{H}_{\text{ar}}$ ), 4.44 (m, 2H,  $2\text{CH}$ ), 3.59 (d,  $^2J_{\text{HP}} = 20.3$  Hz, 2H,  $\text{CH}_2$ ), 1.08 (d,  $^3J_{\text{HH}} = 6.1$  Hz, 6H,  $2\text{CH}_3$ ), 1.04 (d,

$^3J_{HH} = 6.2$  Hz, 6H, 2CH<sub>3</sub>).  $^{13}\text{C}$  NMR (101 MHz, CDCl<sub>3</sub>)  $\delta$  148.2, 141.1 (d,  $^2J_{CP} = 9.9$  Hz), 126.1, 122.7, 121.6, 113.2, 72.0 (d,  $^2J_{CP} = 7.0$  Hz), 25.3 (d,  $^1J_{CP} = 143.1$  Hz), 23.8 (d,  $^3J_{CP} = 4.0$  Hz), 23.7 (d,  $^3J_{CP} = 4.9$  Hz).  $^{31}\text{P}$  NMR (162 MHz, CDCl<sub>3</sub>)  $\delta$  18.08.  $\nu_{\text{max}}(\text{KBr})/\text{cm}^{-1}$  3464, 2981, 1632, 1502, 1385, 1249, 1104, 990, 739. HRMS-ESI (m/z): calcd for C<sub>13</sub>H<sub>19</sub>ClN<sub>3</sub>O<sub>3</sub>P, [M+H]<sup>+</sup>: 332.0925, found 332.0925.

#### Dimethyl ((6-chloro-[1,2,4]triazolo[4,3-a]pyridin-3-yl)methyl)phosphonate **5a**

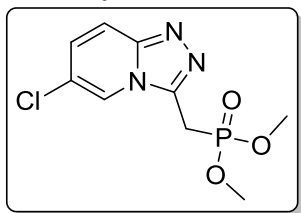

Following the general procedure, **5a** was obtained from **1c** and **2a** as pale solid.  $^1\text{H}$  NMR (400 MHz, CDCl<sub>3</sub>)  $\delta$  8.32 (s, 1H, 5-H<sub>ar.</sub>), 7.70 (d,  $^3J_{HH} = 9.7$  Hz, 1H, 8-H<sub>ar.</sub>), 7.22 (dd,  $^3J_{HH} = 9.7$ ,  $^4J_{HH} = 1.6$  Hz, 1H, 7-H<sub>ar.</sub>), 3.76 (d,  $^3J_{HP} = 11.0$  Hz, 6H, 2OCH<sub>3</sub>), 3.75 (d,  $^2J_{HP} = 20.6$  Hz, 2H, CH<sub>2</sub>).  $^{13}\text{C}$  NMR (101 MHz, CDCl<sub>3</sub>)  $\delta$  149.3, 139.2 (d,  $^2J_{CP} = 9.9$  Hz), 129.2, 122.7, 121.2, 116.9, 53.6 (d,  $^3J_{CP} = 6.7$  Hz), 23.6 (d,  $^1J_{CP} = 143.0$  Hz).  $^{31}\text{P}$  NMR (162 MHz, CDCl<sub>3</sub>)  $\delta$  22.45.  $\nu_{\text{max}}(\text{KBr})/\text{cm}^{-1}$  3087, 2950, 1635, 1506, 1255, 1239, 1043, 1024, 874, 820. HRMS-ESI (m/z): calcd for C<sub>9</sub>H<sub>11</sub>ClN<sub>3</sub>O<sub>3</sub>P, [M+H]<sup>+</sup>: 276.0299, found 276.0308. M. p. 144 - 145 °C.

#### Diisopropyl ((6-chloro-[1,2,4]triazolo[4,3-a]pyridin-3-yl)methyl)phosphonate **5b**

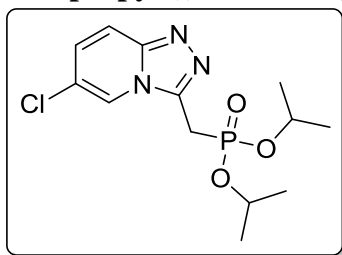

Following the general procedure, **5b** was obtained from **1c** and **2b** as pale solid.  $^1\text{H}$  NMR (400 MHz, CDCl<sub>3</sub>)  $\delta$  8.37 (s, 1H, 5-H<sub>ar.</sub>), 7.67 (d,  $^3J_{HH} = 9.7$  Hz, 1H, 8-H<sub>ar.</sub>), 7.19 (dd,  $^3J_{HH} = 9.7$ ,  $^4J_{HH} = 1.8$  Hz, 1H, 7-H<sub>ar.</sub>), 4.65 (m, 2H, 2CH), 3.69 (d,  $^2J_{HP} = 20.3$  Hz, 2H, CH<sub>2</sub>), 1.26 (d,  $^3J_{HH} = 6.1$  Hz, 6H, 2CH<sub>3</sub>), 1.25 (d,  $^3J_{HH} = 6.1$  Hz, 6H, 2CH<sub>3</sub>).  $^{13}\text{C}$  NMR (101 MHz, CDCl<sub>3</sub>)  $\delta$  149.1, 139.8 (d,  $^2J_{CP} = 10.2$  Hz), 128.9, 122.1, 121.66, 116.8, 72.4 (d,  $^2J_{CP} = 7.2$  Hz), 25.7 (d,  $^1J_{CP} = 143.7$  Hz), 24.1 (d,  $^3J_{CP} = 4.2$  Hz), 24.0 (d,  $^3J_{CP} = 4.7$  Hz).  $^{31}\text{P}$  NMR (162 MHz, CDCl<sub>3</sub>)  $\delta$  18.12.  $\nu_{\text{max}}(\text{KBr})/\text{cm}^{-1}$  3075, 2980, 2921, 1634, 1506, 1384, 1238, 1025, 982, 802, 796. HRMS-ESI (m/z): calcd for C<sub>13</sub>H<sub>19</sub>ClN<sub>3</sub>O<sub>3</sub>P, [M+H]<sup>+</sup>: 332.0925, found 332.0929. M. p. 132 - 133 °C.

#### Dimethyl ((5-chloro-[1,2,4]triazolo[4,3-a]pyridin-3-yl)methyl)phosphonate **6a**

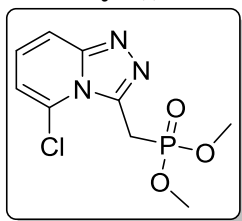

Following the general procedure, **6a** was obtained from **1d** and **2a** as pale solid.  $^1\text{H}$  NMR (400 MHz, CDCl<sub>3</sub>)  $\delta$  8.24 (d,  $^3J_{HH} = 7.0$  Hz, 1H, 8-H<sub>ar.</sub>), 7.34 (d,  $^3J_{HH} = 7.1$  Hz, 1H, 7-H<sub>ar.</sub>), 6.85 (t,  $^3J_{HH} = 7.0$  Hz, 1H, 6-H<sub>ar.</sub>), 4.19 (d,  $J = 20.6$  Hz, 2H, CH<sub>2</sub>), 3.76 (d,  $^3J_{HP} = 11.0$  Hz, 6H, 2OCH<sub>3</sub>).  $^{13}\text{C}$  NMR (101 MHz, CDCl<sub>3</sub>)  $\delta$  148.7, 140.5 (d,  $^2J_{CP} = 10.1$  Hz), 126.1, 122.5, 122.1, 113.7, 53.5 (d,  $^2J_{CP} = 6.7$  Hz), 23.7 (d,  $^1J_{CP} = 142.6$  Hz).  $^{31}\text{P}$  NMR (162 MHz, CDCl<sub>3</sub>)  $\delta$  22.33.  $\nu_{\text{max}}(\text{KBr})/\text{cm}^{-1}$  2957, 2360, 1630, 1494, 1404, 1354, 1298, 1267, 1248, 1230, 1138, 1003, 875, 829, 783, 731, 669, 597, 524. HRMS-ESI (m/z): calcd for C<sub>9</sub>H<sub>11</sub>ClN<sub>3</sub>O<sub>3</sub>P, [M+H]<sup>+</sup>: 276.0299, found 276.0293. M. p. 99 - 100 °C.

**Diisopropyl ((5-chloro-[1,2,4]triazolo[4,3-a]pyridin-3-yl)methyl)phosphonate 6b**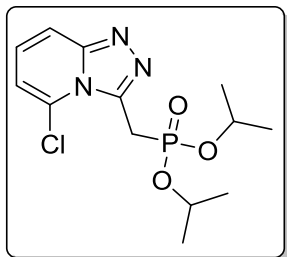

Following the general procedure, **3b** was obtained from **1d** and **2b** as pale yellow oil.  $^1\text{H}$  NMR (400 MHz,  $\text{CDCl}_3$ )  $\delta$  7.64 (dd,  $^3J_{\text{HH}} = 9.2$ ,  $^4J_{\text{HH}} = 0.9$  Hz, 1H, 8- $\text{H}_{\text{ar}}$ ), 7.14 (dd,  $^3J_{\text{HH}} = 9.2$ , 7.0 Hz, 1H, 7- $\text{H}_{\text{ar}}$ ), 6.82 (dd,  $^3J_{\text{HH}} = 7.0$ ,  $^4J_{\text{HH}} = 0.8$  Hz, 1H, 6- $\text{H}_{\text{ar}}$ ), 4.66 (m, 2H, 2CH), 4.11 (d,  $^2J_{\text{HP}} = 20.7$  Hz, 2H,  $\text{CH}_2$ ), 1.26 (d,  $^3J_{\text{HH}} = 6.2$  Hz, 6H), 1.23 (d,  $^3J_{\text{HH}} = 6.2$  Hz, 6H).  $^{13}\text{C}$  NMR (101 MHz,  $\text{CDCl}_3$ )  $\delta$  152.0, 140.4 (d,  $^2J_{\text{CP}} = 11.0$  Hz), 127.5, 125.4, 115.2, 115.0, 71.5 (d,  $^2J_{\text{CP}} = 7.2$  Hz), 27.9 (d,  $^1J_{\text{CP}} = 142.9$  Hz), 23.8 (d,  $^3J_{\text{CP}} = 3.7$  Hz), 23.7 (d,  $^3J_{\text{CP}} = 5.2$  Hz).  $^{31}\text{P}$  NMR (162 MHz,  $\text{CDCl}_3$ )  $\delta$  18.20.  $\nu_{\text{max}}(\text{KBr})/\text{cm}^{-1}$  3471, 2981, 1629, 1496, 1387, 1255, 1106, 987, 788. HRMS-ESI ( $m/z$ ): calcd for  $\text{C}_{13}\text{H}_{19}\text{ClN}_3\text{O}_3\text{P}$ ,  $[\text{M}+\text{H}]^+$ : 332.0925, found 332.0919.

**Dimethyl ((6-methyl-[1,2,4]triazolo[4,3-a]pyridin-3-yl)methyl)phosphonate 7a**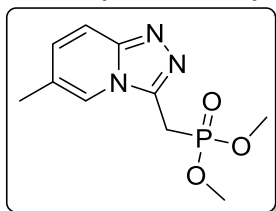

Following the general procedure, **7a** was obtained from **1e** and **2a** as pale solid.  $^1\text{H}$  NMR (400 MHz,  $\text{CDCl}_3$ )  $\delta$  8.01 (d,  $^4J_{\text{HH}} = 1.4$  Hz, 1H, 5- $\text{H}_{\text{ar}}$ ), 7.67 (d,  $^3J_{\text{HH}} = 9.4$  Hz, 1H, 8- $\text{H}_{\text{ar}}$ ), 7.14 (dd,  $^3J_{\text{HH}} = 9.4$ ,  $^4J_{\text{HH}} = 1.4$  Hz, 1H, 7- $\text{H}_{\text{ar}}$ ), 3.77 (d,  $^3J_{\text{HP}} = 11.1$  Hz, 6H, 2 $\text{CH}_3$ ), 3.77 (d,  $^2J_{\text{HP}} = 20.3$  Hz, 2H,  $\text{CH}_2$ ), 2.38 (s, 3H,  $\text{CH}_3$ ).  $^{13}\text{C}$  NMR (101 MHz,  $\text{CDCl}_3$ )  $\delta$  150.0, 138.2 (d,  $^2J_{\text{CP}} = 9.8$  Hz), 130.7, 123.9, 120.2, 115.6, 53.4 (d,  $^2J_{\text{CP}} = 6.8$  Hz), 23.4 (d,  $^1J_{\text{CP}} = 143.2$  Hz), 18.3.  $^{31}\text{P}$  NMR (162 MHz,  $\text{CDCl}_3$ )  $\delta$  22.92.  $\nu_{\text{max}}(\text{KBr})/\text{cm}^{-1}$  3396, 2947, 1649, 1520, 1425, 1256, 1187, 1042, 1020, 876, 822, 759, 773. HRMS-ESI ( $m/z$ ): calcd for  $\text{C}_{10}\text{H}_{14}\text{N}_3\text{O}_3\text{P}$ ,  $[\text{M}+\text{Na}]^+$ : 278.0665, found 278.0666. M. p. 128 - 130  $^\circ\text{C}$ .

**Diisopropyl ((6-methyl-[1,2,4]triazolo[4,3-a]pyridin-3-yl)methyl)phosphonate 7b**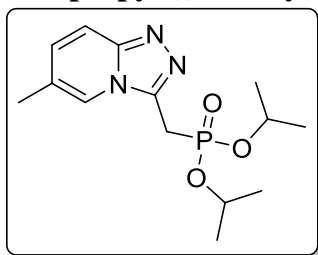

Following the general procedure, **7b** was obtained from **1e** and **2b** as pale yellow oil.  $^1\text{H}$  NMR (400 MHz,  $\text{CDCl}_3$ )  $\delta$  7.79 (s, 1H, 5- $\text{H}_{\text{ar}}$ ), 7.27 (d,  $^3J_{\text{HH}} = 9.4$  Hz, 1H, 8- $\text{H}_{\text{ar}}$ ), 6.80 (d,  $^3J_{\text{HH}} = 9.4$  Hz, 1H, 7- $\text{H}_{\text{ar}}$ ), 4.34 (m,  $^3J_{\text{HH}} = 6.2$  Hz, 2H, 2CH), 3.42 (d,  $^2J_{\text{HP}} = 20.3$  Hz, 2H,  $\text{CH}_2$ ), 2.02 (s, 3H,  $\text{CH}_3$ ) 0.96 (d,  $^3J_{\text{HH}} = 6.2$  Hz, 6H, 2 $\text{CH}_3$ ), 0.92 (d,  $^3J_{\text{HH}} = 6.2$  Hz, 6H, 2 $\text{CH}_3$ ).  $^{13}\text{C}$  NMR (101 MHz,  $\text{CDCl}_3$ )  $\delta$  149.4, 138.6 (d,  $^2J_{\text{CP}} = 10.1$  Hz), 130.3, 122.9, 120.6, 114.9, 71.6 (d,  $^2J_{\text{CP}} = 7.0$  Hz), 25.1 (d,  $^1J_{\text{CP}} = 143.6$  Hz), 23.7 (d,  $^3J_{\text{CP}} = 3.9$  Hz), 23.5 (d,  $^3J_{\text{CP}} = 5.0$  Hz), 17.9.  $^{31}\text{P}$  NMR (162 MHz,  $\text{CDCl}_3$ )  $\delta$  18.51.  $\nu_{\text{max}}(\text{KBr})/\text{cm}^{-1}$  3494, 2981, 1646, 1525, 1383, 1274, 1209, 1105, 999, 813. HRMS-ESI ( $m/z$ ): calcd for  $\text{C}_{14}\text{H}_{22}\text{N}_3\text{O}_3\text{P}$ ,  $[\text{M}+\text{H}]^+$ : 312.1472, found 312.1466.

**Dimethyl ((5-methyl-[1,2,4]triazolo[4,3-a]pyridin-3-yl)methyl)phosphonate 8a**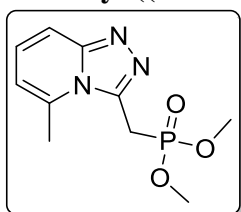

Following the general procedure, **8a** was obtained from **1f** and **2a** as pale yellow oil.  $^1\text{H}$  NMR (400 MHz,  $\text{CDCl}_3$ )  $\delta$  7.09 (d,  $^3J_{\text{HH}} = 9.2$  Hz, 1H, 8- $\text{H}_{\text{ar}}$ ), 6.70 (dd,  $^3J_{\text{HH}} = 9.2$ , 6.7 Hz, 1H, 7- $\text{H}_{\text{ar}}$ ), 6.14 (d,  $^3J_{\text{HH}} = 6.7$  Hz, 1H, 6- $\text{H}_{\text{ar}}$ ), 3.61 (d,  $^2J_{\text{HP}} = 20.6$  Hz, 2H,  $\text{CH}_2$ ), 3.35 (d,  $^3J_{\text{HP}} = 11.1$  Hz, 6H, 2 $\text{CH}_3$ ), 2.53 (s, 3H,  $\text{CH}_3$ ).  $^{13}\text{C}$  NMR (101 MHz,  $\text{CDCl}_3$ )  $\delta$  151.5, 139.0 (d,  $^2J_{\text{CP}} = 9.9$  Hz), 134.7, 127.5, 114.4, 113.7, 53.1 (d,  $^2J_{\text{CP}} = 6.9$  Hz), 25.4 (d,  $^1J_{\text{CP}} = 141.8$  Hz), 19.3.  $^{31}\text{P}$  NMR (162 MHz,  $\text{CDCl}_3$ )  $\delta$  23.00.  $\nu_{\text{max}}(\text{KBr})/\text{cm}^{-1}$  3420, 3273, 2360, 1651, 1573, 1518, 1446, 1232, 1199, 1107, 1043, 486, 798, 769, 746, 696. HRMS-ESI ( $m/z$ ): calcd for  $\text{C}_{10}\text{H}_{14}\text{N}_3\text{O}_3\text{P}$ ,  $[\text{M}+\text{H}]^+$ : 256.0846, found 256.0852.

#### Diisopropyl ((5-methyl-[1,2,4]triazolo[4,3-a]pyridin-3-yl)methyl)phosphonate **8b**

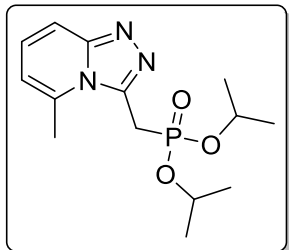

Following the general procedure, **8b** was obtained from **1f** and **2b** as pale yellow oil.  $^1\text{H}$  NMR (400 MHz,  $\text{CDCl}_3$ )  $\delta$  7.56 (d,  $^3J_{\text{HH}} = 9.2$  Hz, 1H, 8- $\text{H}_{\text{ar}}$ ), 7.09 (dd,  $^3J_{\text{HH}} = 9.2$ , 6.7 Hz, 1H, 7- $\text{H}_{\text{ar}}$ ), 6.51 (d,  $^3J_{\text{HH}} = 6.6$  Hz, 1H, 6- $\text{H}_{\text{ar}}$ ), 4.79 – 4.40 (m, 2H, 2OCH), 3.92 (d,  $^2J_{\text{HP}} = 20.6$  Hz, 2H,  $\text{CH}_2$ ), 2.97 (s, 3H,  $\text{CH}_3$ ), 1.40 – 1.05 (m, 12H, 4 $\text{CH}_3$ ).  $^{13}\text{C}$  NMR (101 MHz,  $\text{CDCl}_3$ )  $\delta$  152.0, 139.8 (d,  $^2J_{\text{CP}} = 10.5$  Hz), 134.9, 127.4, 114.5, 114.5, 71.9 (d,  $^2J_{\text{CP}} = 7.0$  Hz), 27.7 (d,  $^1J_{\text{CP}} = 143.3$  Hz), 24.0 (d,  $^3J_{\text{CP}} = 3.8$  Hz), 23.8 (d,  $^3J_{\text{CP}} = 5.1$  Hz), 19.9.  $^{31}\text{P}$  NMR (162 MHz,  $\text{CDCl}_3$ )  $\delta$  18.65.  $\nu_{\text{max}}(\text{KBr})/\text{cm}^{-1}$  2978, 1640, 1512, 1465, 1383, 1245, 1107, 994, 791. HRMS-ESI ( $m/z$ ): calcd for  $\text{C}_{14}\text{H}_{22}\text{N}_3\text{O}_3\text{P}$ ,  $[\text{M}+\text{H}]^+$ : 312.1472, found 312.1479.

#### Dimethyl ((6-nitro-[1,2,4]triazolo[4,3-a]pyridin-3-yl)methyl)phosphonate **10a**

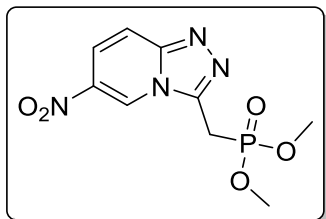

Following the general procedure, **10a** was obtained from **1j** and **2a** as pale yellow oil.  $^1\text{H}$  NMR (400 MHz,  $\text{CDCl}_3$ )  $\delta$  9.48 (s, 1H, 5- $\text{H}_{\text{ar}}$ ), 8.05 (d,  $^3J_{\text{HH}} = 10.0$  Hz, 1H, 8- $\text{H}_{\text{ar}}$ ), 7.86 (d,  $^3J_{\text{HH}} = 10.0$  Hz, 1H, 7- $\text{H}_{\text{ar}}$ ), 3.91 (d,  $^2J_{\text{HP}} = 20.6$  Hz, 2H,  $\text{CH}_2$ ), 3.82 (d,  $^3J_{\text{HP}} = 11.1$  Hz, 6H, 2 $\text{CH}_3$ ).  $^{13}\text{C}$  NMR (101 MHz,  $\text{CDCl}_3$ )  $\delta$  149.9, 141.9 (d,  $^2J_{\text{CP}} = 10.1$  Hz), 138.4, 124.6, 121.5, 116.6, 53.7 (d,  $^2J_{\text{CP}} = 6.7$  Hz), 23.6 (d,  $^1J_{\text{CP}} = 142.5$  Hz).  $^{31}\text{P}$  NMR (162 MHz,  $\text{CDCl}_3$ )  $\delta$  21.88.  $\nu_{\text{max}}(\text{KBr})/\text{cm}^{-1}$  3038, 2361, 1636, 1527, 1473, 1257, 1030, 866, 827, 794, 756, 534. HRMS-ESI ( $m/z$ ): calcd for  $\text{C}_9\text{H}_{12}\text{N}_4\text{O}_5\text{P}$ ,  $[\text{M}+\text{H}]^+$ : 287.0540, found 287.0548.

#### Dimethyl ((8-nitro-[1,2,4]triazolo[1,5-a]pyridin-3-yl)methyl)phosphonate **11a**

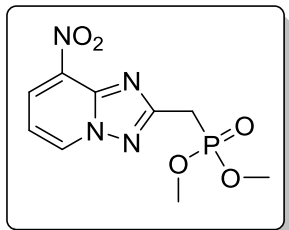

Following the general procedure, **11a** was obtained from **1i** and **2a** as pale solid.  $^1\text{H}$  NMR (400 MHz,  $\text{CDCl}_3$ )  $\delta$  8.90 (dd,  $^3J_{\text{HH}} = 6.7$ ,  $^4J_{\text{HH}} = 1.2$  Hz, 1H, 5- $\text{H}_{\text{ar}}$ ), 8.57 (dd,  $^3J_{\text{HH}} = 7.9$ ,  $^3J_{\text{HH}} = 1.2$  Hz, 1H, 7- $\text{H}_{\text{ar}}$ ), 7.23 (dd,  $^3J_{\text{HH}} = 7.9$ , 6.7 Hz, 1H, 6- $\text{H}_{\text{ar}}$ ), 3.90 (d,  $^2J_{\text{HP}} = 11.1$  Hz, 6H, 2 $\text{CH}_3$ ), 3.71 (d,  $^2J_{\text{HP}} = 21.6$  Hz, 2H,  $\text{CH}_2$ ).  $^{13}\text{C}$  NMR (101 MHz,  $\text{CDCl}_3$ )  $\delta$  161.9 (d,  $^2J_{\text{CP}} = 8.1$  Hz), 145.5, 136.5, 133.9, 128.1, 111.6, 53.4 (d,  $^2J_{\text{CP}} = 6.5$  Hz), 27.0 (d,  $^1J_{\text{CP}} = 140.2$  Hz).  $^{31}\text{P}$  NMR (162 MHz,  $\text{CDCl}_3$ )  $\delta$  24.68.  $\nu_{\text{max}}(\text{KBr})/\text{cm}^{-1}$  3037, 2361, 1635, 1528, 1474, 1296, 1257, 1215, 1030, 989, 866, 827, 795, 756, 534. HRMS-ESI ( $m/z$ ): calcd for  $\text{C}_9\text{H}_{12}\text{N}_4\text{O}_5\text{P}$ ,  $[\text{M}+\text{H}]^+$ : 287.0540, found 287.0553. M. p. 104 – 105  $^{\circ}\text{C}$ .

**Diisopropyl ((8-nitro-[1,2,4]triazolo[1,5-a]pyridin-3-yl)methyl)phosphonate 11b**
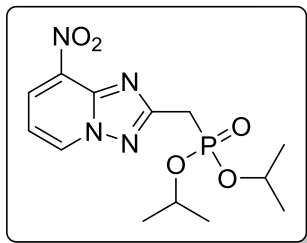

Following the general procedure, **11b** was obtained from **1i** and **2b** as pale solid.  $^1\text{H}$  NMR (400 MHz,  $\text{CDCl}_3$ )  $\delta$  8.88 (dd,  $^3J_{\text{HH}} = 6.8$ ,  $^4J_{\text{HH}} = 1.1$  Hz, 1H, 5- $\text{H}_{\text{ar}}$ ), 8.53 (dd,  $^3J_{\text{HH}} = 7.8$ ,  $^3J_{\text{HH}} = 1.1$  Hz, 1H, 7- $\text{H}_{\text{ar}}$ ), 7.20 (dd,  $^3J_{\text{HH}} = 7.8$ , 6.8 Hz, 1H, 6- $\text{H}_{\text{ar}}$ ), 4.80 (m, 2H), 3.62 (d,  $^2J_{\text{HP}} = 21.5$  Hz, 1H), 1.36 (d,  $^3J_{\text{HH}} = 5.6$  Hz, 3H,  $\text{CH}_3$ ), 1.35 (d,  $^3J_{\text{HH}} = 5.6$  Hz, 3H,  $\text{CH}_3$ ).  $^{13}\text{C}$  NMR (101 MHz,  $\text{CDCl}_3$ )  $\delta$  162.4 (d,  $^2J_{\text{CP}} = 8.1$  Hz), 145.4, 136.4, 133.9, 128.0, 111.4, 71.6 (d,  $^2J_{\text{CP}} = 6.6$  Hz), 28.9 (d,  $^1J_{\text{CP}} = 140.5$  Hz), 24.1 (d,  $J = 3.6$  Hz), 23.9 (d,  $J = 5.2$  Hz).  $^{31}\text{P}$  NMR (162 MHz,  $\text{CDCl}_3$ )  $\delta$  19.71.  $\nu_{\text{max}}$  (KBr)/ $\text{cm}^{-1}$  3046, 2982, 2932, 1638, 1528, 1477, 1383, 1255, 1244, 1109, 976, 785, 756, 681, 540. HRMS-ESI ( $m/z$ ): calcd for  $\text{C}_{13}\text{H}_{19}\text{N}_4\text{O}_5\text{P}$ ,  $[\text{M}+\text{H}]^+$ : 343.2875, found 343.1166. M. p. 89 - 90  $^\circ\text{C}$ .

**Dimethyl ((6-nitro-[1,2,4]triazolo[1,5-a]pyridin-3-yl)methyl)phosphonate 12a**
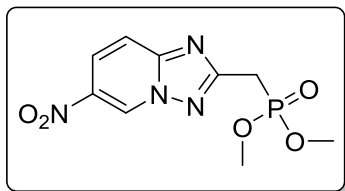

Following the general procedure, **12a** was obtained from **1j** and **2a** as pale yellow oil.  $^1\text{H}$  NMR (400 MHz,  $\text{CDCl}_3$ )  $\delta$  9.61 (d,  $^4J_{\text{HH}} = 2.1$  Hz, 1H, 5- $\text{H}_{\text{ar}}$ ), 8.34 (dd,  $^3J_{\text{HH}} = 9.8$  Hz,  $^4J_{\text{HH}} = 2.1$  Hz, 1H, 7- $\text{H}_{\text{ar}}$ ), 7.82 (d,  $^3J_{\text{HH}} = 9.8$  Hz, 1H, 8- $\text{H}_{\text{ar}}$ ), 3.87 (d,  $^3J_{\text{HP}} = 21.6$  Hz, 2H,  $\text{CH}_2$ ), 3.63 (d,  $^2J_{\text{HP}} = 11.1$  Hz, 6H,  $2\text{CH}_3$ ).  $^{13}\text{C}$  NMR (101 MHz,  $\text{CDCl}_3$ )  $\delta$  163.3 (d,  $^2J_{\text{CP}} = 8.6$  Hz), 152.7, 137.9, 127.7, 124.2, 115.9, 53.3 (d,  $^2J_{\text{CP}} = 6.1$  Hz), 27.0 (d,  $^1J_{\text{CP}} = 140.1$  Hz).  $^{31}\text{P}$  NMR (162 MHz,  $\text{CDCl}_3$ )  $\delta$  24.53.  $\nu_{\text{max}}$  (KBr)/ $\text{cm}^{-1}$  3075, 2918, 2361, 2342, 1643, 1526, 1472, 1389, 1350, 1252, 1022, 862, 798, 735, 532. HRMS-ESI ( $m/z$ ): calcd for  $\text{C}_9\text{H}_{12}\text{N}_4\text{O}_5\text{P}$ ,  $[\text{M}+\text{H}]^+$ : 287.1812, found 287.0540.

**Diisopropyl ((6-nitro-[1,2,4]triazolo[4,3-a]pyridin-3-yl)methyl)phosphonate 12b**
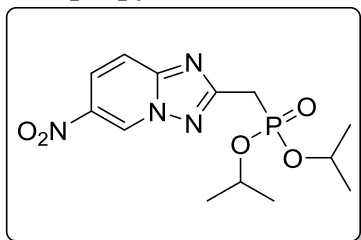

Following the general procedure, **12b** was obtained from **1j** and **2b** as pale yellow oil.  $^1\text{H}$  NMR (400 MHz,  $\text{CDCl}_3$ )  $\delta$  9.60 (dd,  $^3J_{\text{HH}} = 2.2$ ,  $^4J_{\text{HH}} = 0.8$  Hz, 1H, 5- $\text{H}_{\text{ar}}$ ), 8.32 (dd,  $^3J_{\text{HH}} = 9.8$ ,  $^3J_{\text{HH}} = 2.2$  Hz, 1H, 7- $\text{H}_{\text{ar}}$ ), 7.80 (dd,  $^3J_{\text{HH}} = 9.8$ , 0.8 Hz, 1H, 6- $\text{H}_{\text{ar}}$ ), 4.80 (m, 2H), 3.56 (d,  $^2J_{\text{HP}} = 21.6$  Hz, 2H,  $\text{CH}_2$ ), 1.36 (d,  $^3J_{\text{HH}} = 6.1$  Hz, 3H,  $\text{CH}_3$ ), 1.34 (d,  $^3J_{\text{HH}} = 6.1$  Hz, 3H,  $\text{CH}_3$ ).  $^{13}\text{C}$  NMR (101 MHz,  $\text{CDCl}_3$ )  $\delta$  163.9 (d,  $^2J_{\text{CP}} = 8.5$  Hz), 152.6, 137.8, 127.6, 124.0, 115.8, 71.5 (d,  $^2J_{\text{CP}} = 6.6$  Hz), 29.2 (d,  $^1J_{\text{CP}} = 140.4$  Hz), 24.1 (d,  $J = 3.7$  Hz), 23.9 (d,  $J = 5.1$  Hz).  $^{31}\text{P}$  NMR (162 MHz,  $\text{CDCl}_3$ )  $\delta$  19.65.  $\nu_{\text{max}}$  (KBr)/ $\text{cm}^{-1}$  3078, 2982, 1639, 1558, 1529, 1476, 1348, 1234, 1107, 982, 783, 761, 734, 529. HRMS-ESI ( $m/z$ ): calcd for  $\text{C}_{13}\text{H}_{19}\text{N}_4\text{O}_5\text{P}$ ,  $[\text{M}+\text{H}]^+$ : 343.2875, found 343.1166.

### Dimethyl ([1,2,4]triazolo[4,3-a]quinolin-1-ylmethyl)phosphonate **13a**

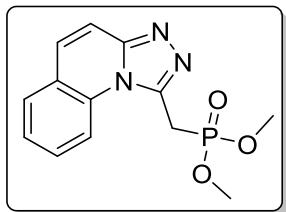

Following the general procedure, **13a** was obtained from **1g** and **2a** as pale solid.  $^1\text{H}$  NMR (400 MHz,  $\text{CDCl}_3$ )  $\delta$  8.85 – 8.48 (m, 1H), 7.99 (d,  $^3J_{\text{HH}} = 7.4$  Hz, 1H), 7.81 – 7.56 (m, 3H), 7.10 (d,  $^3J_{\text{HH}} = 7.4$  Hz, 1H), 3.80 (d,  $^2J_{\text{HP}} = 20.4$  Hz, 2H,  $\text{CH}_2$ ), 3.77 (d,  $^3J_{\text{HP}} = 11.1$  Hz, 6H,  $2\text{OCH}_3$ ).  $^{13}\text{C}$  NMR (101 MHz,  $\text{CDCl}_3$ )  $\delta$  149.3, 140.6 (d,  $^2J_{\text{CP}} = 9.8$  Hz), 130.2, 129.7, 129.1, 127.1, 123.9, 121.4, 119.8, 115.2, 53.5 (d,  $^2J_{\text{CP}} = 6.7$  Hz), 23.4 (d,  $^1J_{\text{CP}} = 142.6$  Hz).  $^{31}\text{P}$  NMR (162 MHz,  $\text{CDCl}_3$ )  $\delta$  22.75.  $\nu_{\text{max}}(\text{KBr})/\text{cm}^{-1}$  3473, 2941, 1661, 1643, 1524, 1453, 1401, 1130, 1063, 1023, 898, 885, 839, 808, 790. HRMS-ESI ( $m/z$ ): calcd for  $\text{C}_{13}\text{H}_{14}\text{N}_3\text{O}_3\text{P}$ ,  $[\text{M}+\text{H}]^+$ : 292.0846, found 292.0839. M. p. 108 - 109  $^\circ\text{C}$ .

### Diisopropyl ([1,2,4]triazolo[4,3-a]quinolin-1-ylmethyl)phosphonate **13b**

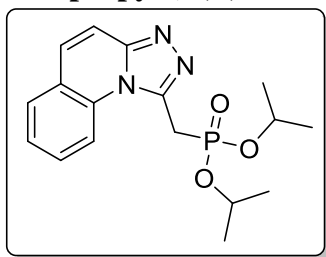

Following the general procedure, **13b** was obtained from **1g** and **2b** as pale solid.  $^1\text{H}$  NMR (400 MHz,  $\text{CDCl}_3$ )  $\delta$  8.79 – 8.68 (m, 1H), 8.10 (d,  $^3J_{\text{HH}} = 7.4$  Hz, 1H), 7.89 – 7.57 (m, 3H), 7.10 (d,  $^3J_{\text{HH}} = 7.4$  Hz, 1H), 4.67 (m, 2H,  $2\text{OCH}$ ), 3.75 (d,  $^2J_{\text{HP}} = 20.4$  Hz, 2H,  $\text{CH}_2$ ), 1.29 (d,  $^3J_{\text{HH}} = 6.5$  Hz, 6H), 1.28 (d,  $^3J_{\text{HH}} = 6.5$  Hz, 6H).  $^{13}\text{C}$  NMR (101 MHz,  $\text{CDCl}_3$ )  $\delta$  149.3, 141.2 (d,  $^2J_{\text{CP}} = 9.6$  Hz), 130.1, 129.7, 129.0, 127.1, 124.0, 121.5, 120.4, 114.7, 72.1 (d,  $^2J_{\text{CP}} = 6.9$  Hz), 25.5 (d,  $^1J_{\text{CP}} = 143.2$  Hz), 24.0 (d,  $^3J_{\text{CP}} = 4.2$  Hz), 24.1 (d,  $^3J_{\text{CP}} = 4.8$  Hz).  $^{31}\text{P}$  NMR (162 MHz,  $\text{CDCl}_3$ )  $\delta$  18.40.  $\nu_{\text{max}}(\text{KBr})/\text{cm}^{-1}$  3464, 2977, 1642, 1524, 1460, 1377, 1242, 1107, 999, 976, 794. HRMS-ESI ( $m/z$ ): calcd for  $\text{C}_{17}\text{H}_{22}\text{N}_3\text{O}_3\text{P}$ ,  $[\text{M}+\text{H}]^+$ : 348.1472, found 348.1486. M. p. 90 - 91  $^\circ\text{C}$ .

### Diethyl ([1,2,4]triazolo[4,3-a]quinolin-1-ylmethyl)phosphonate **13c**

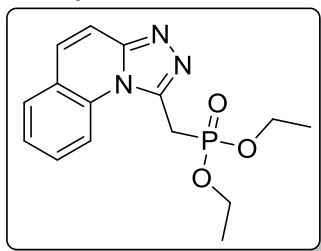

Following the general procedure, **13c** was obtained from **1g** and **2c** as pale yellow oil.  $^1\text{H}$  NMR (400 MHz,  $\text{CDCl}_3$ )  $\delta$  8.38 (d,  $^3J_{\text{HH}} = 7.9$  Hz, 1H), 7.77 (d,  $^3J_{\text{HH}} = 7.9$  Hz, 1H), 7.67 (t,  $^3J_{\text{HH}} = 7.9$  Hz, 1H), 7.58 (dd,  $^3J_{\text{HH}} = 7.9$  Hz, 1H), 7.55 – 7.46 (m, 2H), 4.18 – 4.08 (m, 2H,  $\text{CH}_2$ ), 4.14 (d,  $^2J_{\text{HP}} = 20.3$  Hz, 4H,  $2\text{OCH}_2$ ), 1.22 (d,  $^3J_{\text{HH}} = 7.1$  Hz, 3H,  $\text{CH}_3$ ), 1.20 (d,  $^3J_{\text{HH}} = 7.1$  Hz, 3H,  $\text{CH}_3$ ).  $^{13}\text{C}$  NMR (101 MHz,  $\text{CDCl}_3$ )  $\delta$  150.3, 142.0 (d,  $^2J_{\text{CP}} = 9.7$  Hz), 131.8, 129.3, 129.2, 126.3, 124.6, 116.9, 114.9, 63.1 (d,  $^2J_{\text{CP}} = 7.0$  Hz), 27.8 (d,  $^1J_{\text{CP}} = 142.4$  Hz), 16.2 (d,  $^2J_{\text{CP}} = 6.4$  Hz).  $^{31}\text{P}$  NMR (162 MHz,  $\text{CDCl}_3$ )  $\delta$  19.71.  $\nu_{\text{max}}(\text{KBr})/\text{cm}^{-1}$  3421, 2982, 1657, 1605, 1504, 1447, 1372, 1232, 1050, 1026, 969, 830, 811, 758. HRMS-ESI ( $m/z$ ): calcd for  $\text{C}_{15}\text{H}_{18}\text{N}_3\text{O}_3\text{P}$ ,  $[\text{M}+\text{Na}]^+$ : 342.0978, found 342.0991.

### Dimethyl ([1,2,4]triazolo[4,3-a]isoquinolin-3-ylmethyl)phosphonate **14a**

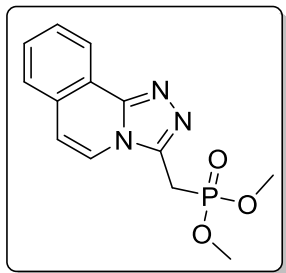

Following the general procedure, **14a** was obtained from **1h** and **2a** as pale solid.  $^1\text{H}$  NMR (400 MHz,  $\text{CDCl}_3$ )  $\delta$  8.40 (d,  $^3J_{\text{HH}} = 8.6$  Hz, 1H), 7.83 (dd,  $^3J_{\text{HH}} = 8.6$ ,  $^4J_{\text{HH}} = 1.4$  Hz, 1H), 7.78 – 7.69 (m, 1H), 7.65 (d,  $^3J_{\text{HH}} = 8.6$  Hz, 1H), 7.61 – 7.53 (m, 1H), 4.19 (d,  $^2J_{\text{HP}} = 20.5$  Hz, 2H,  $\text{CH}_2$ ), 3.82 (d,  $^2J_{\text{HP}} = 11.1$  Hz, 6H,  $2\text{OCH}_3$ ).  $^{13}\text{C}$  NMR (101 MHz,  $\text{CDCl}_3$ )  $\delta$  150.4, 141.8 (d,  $^2J_{\text{CP}} = 9$  Hz), 131.9, 129.8, 129.4, 126.4, 124.8, 116.6, 115.1, 53.6 (d,  $^2J_{\text{CP}} = 7.2$  Hz), 27.2 (d,  $^1J_{\text{CP}} = 143.2$  Hz).  $^{31}\text{P}$  NMR (162 MHz,  $\text{CDCl}_3$ )  $\delta$  22.23.  $\nu_{\text{max}}(\text{KBr})/\text{cm}^{-1}$  4422, 2957, 1622, 1561, 1412, 1260, 1244, 1049, 1014, 864, 822. HRMS-ESI ( $m/z$ ): calcd for  $\text{C}_{13}\text{H}_{14}\text{N}_3\text{O}_3\text{P}$ ,  $[\text{M}+\text{H}]^+$ : 292.0846, found 292.0836. M. p. 132 - 133  $^{\circ}\text{C}$ .

### Diisopropyl ([1,2,4]triazolo[4,3-a]isoquinolin-3-ylmethyl)phosphonate **14b**

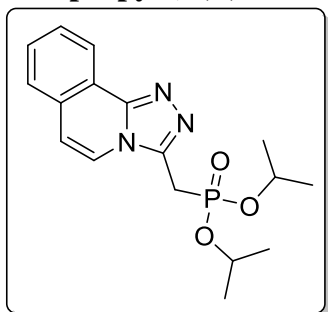

Following the general procedure, **14b** was obtained from **1h** and **2b** as pale solid.  $^1\text{H}$  NMR (400 MHz,  $\text{CDCl}_3$ )  $\delta$  8.43 (d,  $J = 8.6$  Hz, 1H), 7.78 (d,  $^3J_{\text{HH}} = 8.6$  Hz, 1H), 7.68 (t,  $^3J_{\text{HH}} = 8.6$  Hz, 1H), 7.60 (d,  $^3J_{\text{HH}} = 8.6$  Hz, 1H), 7.56 – 7.48 (m, 2H), 4.89 – 4.55 (m, 2H), 4.12 (d,  $^2J_{\text{HP}} = 20.3$  Hz, 2H,  $\text{CH}_2$ ), 1.23 (d,  $^3J_{\text{HH}} = 6.2$  Hz, 12H,  $4\text{CH}_3$ ).  $^{13}\text{C}$  NMR (101 MHz,  $\text{CDCl}_3$ )  $\delta$  150.3, 142.4 (d,  $^2J_{\text{CP}} = 10.0$  Hz), 132.0, 129.6, 129.2, 129.1, 126.2, 124.6, 117.3, 115.1, 72.1 (d,  $^2J_{\text{CP}} = 7.2$  Hz), 29.0 (d,  $^1J_{\text{CP}} = 143.6$  Hz), 23.9 (d,  $J = 5.2$  Hz), 23.8 (d,  $J = 5.2$  Hz).  $^{31}\text{P}$  NMR (162 MHz,  $\text{CDCl}_3$ )  $\delta$  18.40.  $\nu_{\text{max}}(\text{KBr})/\text{cm}^{-1}$  3442, 2976, 1656, 1625, 1563, 1539, 1411, 1376, 1276, 1224, 1105, 1022, 1001, 810. HRMS-ESI ( $m/z$ ): calcd for  $\text{C}_{17}\text{H}_{22}\text{N}_3\text{O}_3\text{P}$ ,  $[\text{M}+\text{H}]^+$ : 348.1472, found 348.1476. M. p. 117 - 118  $^{\circ}\text{C}$ .

### Diethyl ([1,2,4]triazolo[4,3-a]isoquinolin-3-ylmethyl)phosphonate **14c**

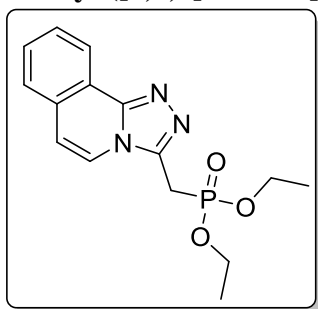

Following the general procedure, **14c** was obtained from **1h** and **2c** as pale solid.  $^1\text{H}$  NMR (400 MHz,  $\text{CDCl}_3$ )  $\delta$  8.49 (d,  $^3J_{\text{HH}} = 8.7$  Hz, 1H), 7.82 (dd,  $^3J_{\text{HH}} = 7.5$ ,  $^4J_{\text{HH}} = 1.6$  Hz, 1H), 7.75 – 7.70 (m,  $^3J_{\text{HH}} = 8.7$ ,  $^3J_{\text{HH}} = 7.5$ ,  $^4J_{\text{HH}} = 1.6$  Hz, 1H), 7.64 (d,  $^3J_{\text{HH}} = 8.7$  Hz, 1H), 7.60 – 7.52 (m, 2H), 4.74 (m,  $^3J_{\text{HP}} = 7.5$  Hz,  $^3J_{\text{HH}} = 6.2$  Hz, 2H,  $\text{CH}_2$ ), 4.15 (d,  $^2J_{\text{HP}} = 20.2$  Hz, 4H,  $2\text{OCH}_2$ ), 1.26 (d,  $^3J_{\text{HH}} = 6.2$  Hz, 6H,  $2\text{CH}_3$ ).  $^{13}\text{C}$  NMR (101 MHz,  $\text{CDCl}_3$ )  $\delta$  150.4, 142.4 (d,  $^2J_{\text{CP}} = 9.7$  Hz), 132.0, 129.6, 129.1, 126.3, 124.7, 117.3, 115.1, 72.1 (d,  $^2J_{\text{CP}} = 7.1$  Hz), 29.0 (d,  $^1J_{\text{CP}} = 143.8$  Hz), 24.0 (d,  $^2J_{\text{CP}} = 5.2$  Hz), 23.8 (d,  $^2J_{\text{CP}} = 5.2$  Hz).  $^{31}\text{P}$  NMR (162 MHz,  $\text{CDCl}_3$ )  $\delta$  17.83.  $\nu_{\text{max}}(\text{KBr})/\text{cm}^{-1}$  3501, 3328, 3234, 2982, 2888, 1643, 1529, 1235, 1047, 1023, 958, 782. HRMS-ESI ( $m/z$ ): calcd for  $\text{C}_{13}\text{H}_{14}\text{N}_3\text{O}_3\text{P}$ ,  $[\text{M}+\text{H}]^+$ : 320.1159, found 320.1150. M. p. 58 - 59  $^{\circ}\text{C}$ .

**E. NMR Spectra**

$^1\text{H}$ , 1D, 400.17 Hz  
 $\text{CDCl}_3$

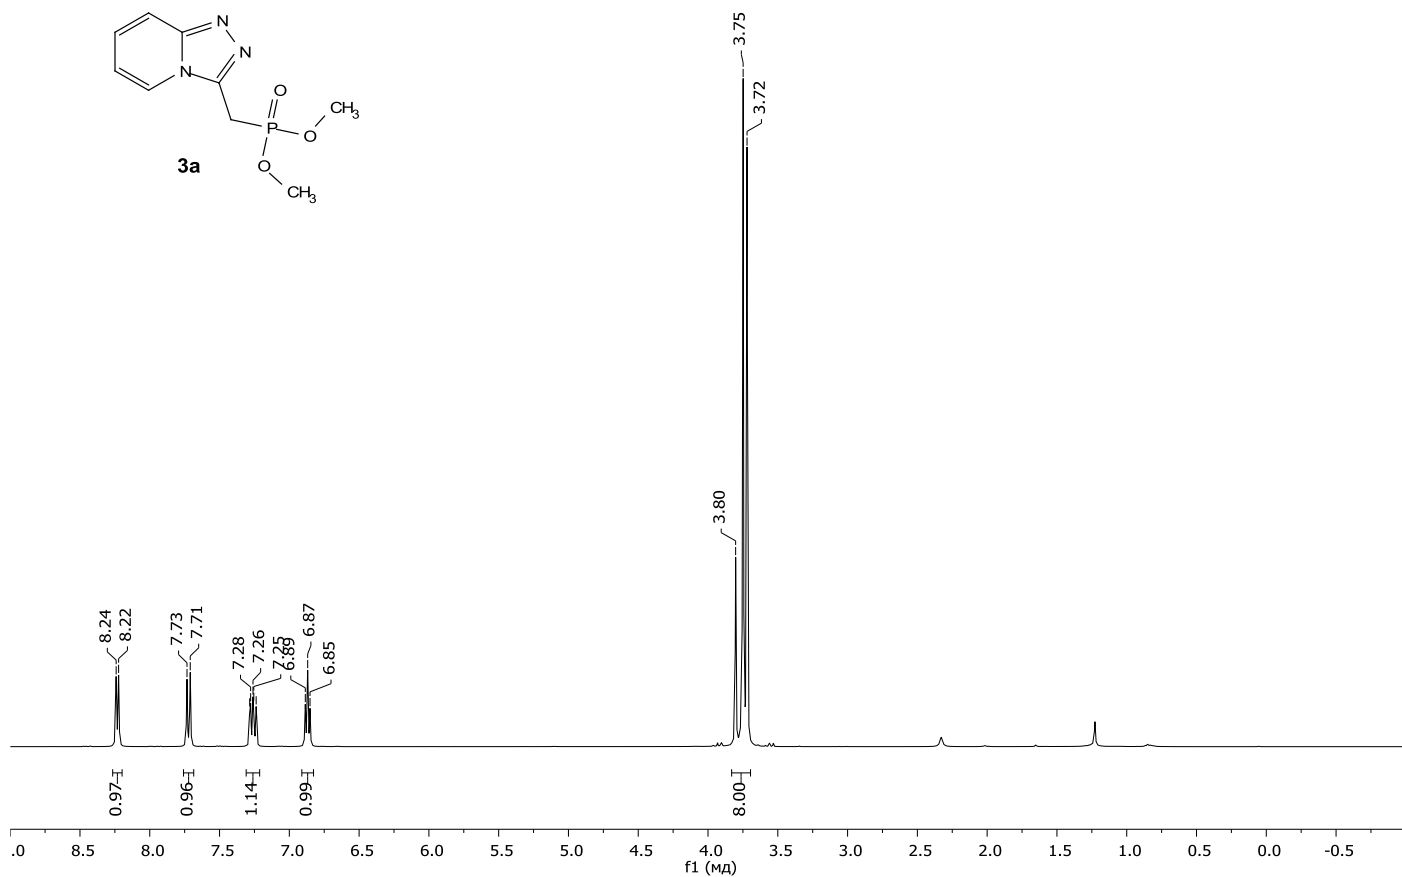

$^{13}\text{C}$ , 1D, 100.63 Hz  
 $\text{CDCl}_3$

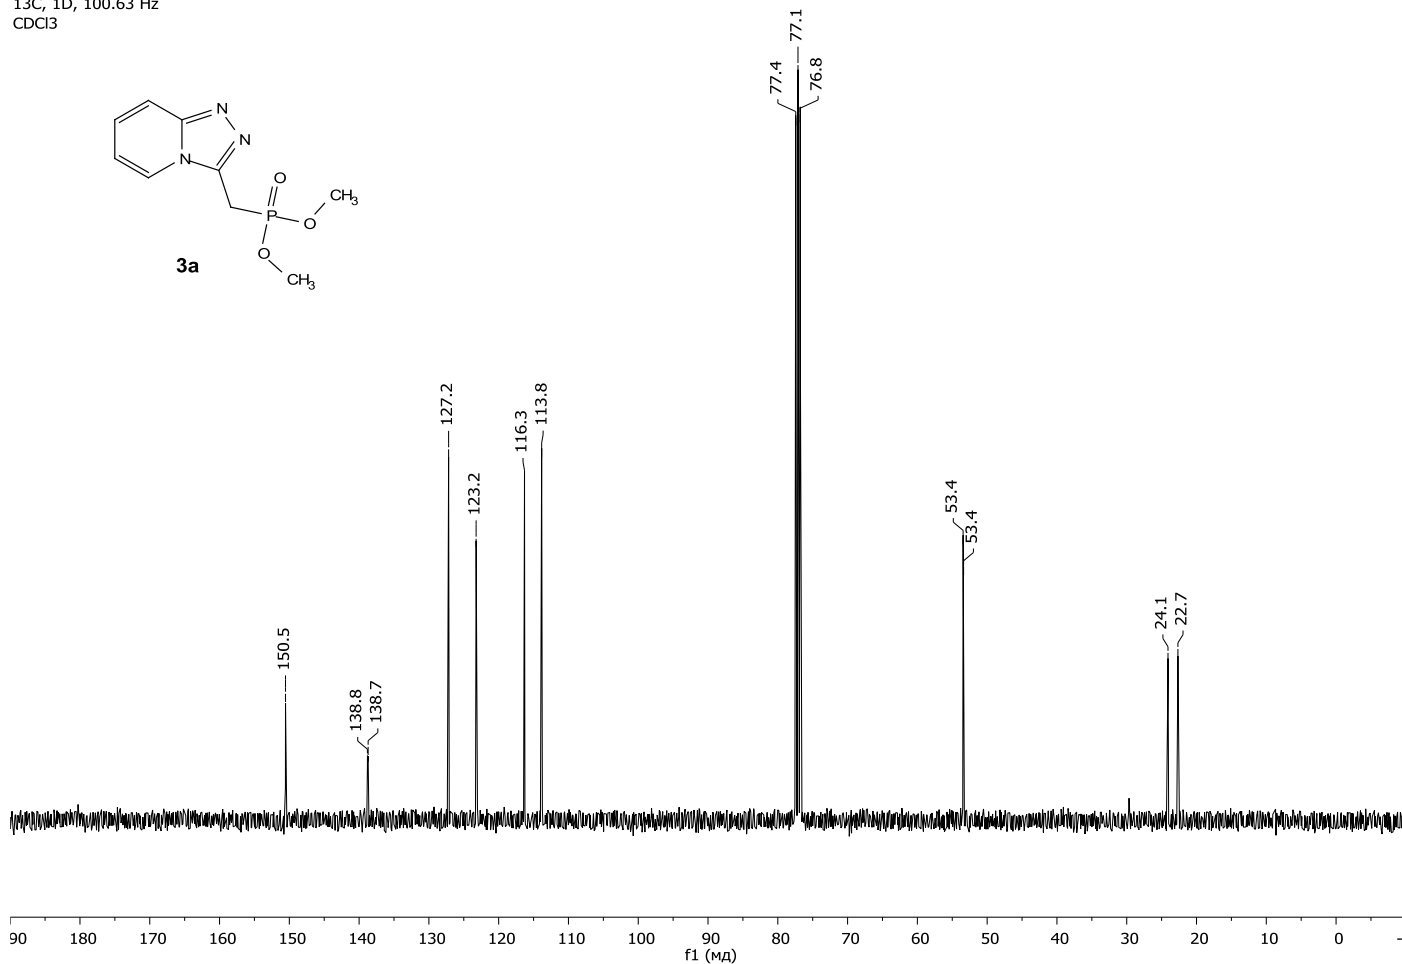

$^{31}\text{P}$ , 1D, 162.01 Hz  
 $\text{CDCl}_3$

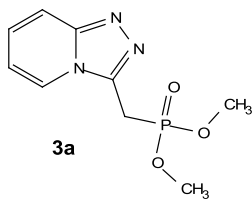

22.85

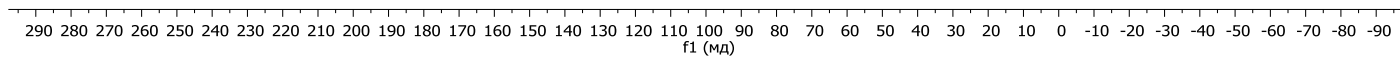

$^1\text{H}$ , 1D, 400.17 Hz  
 $\text{CDCl}_3$

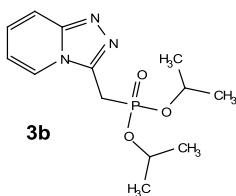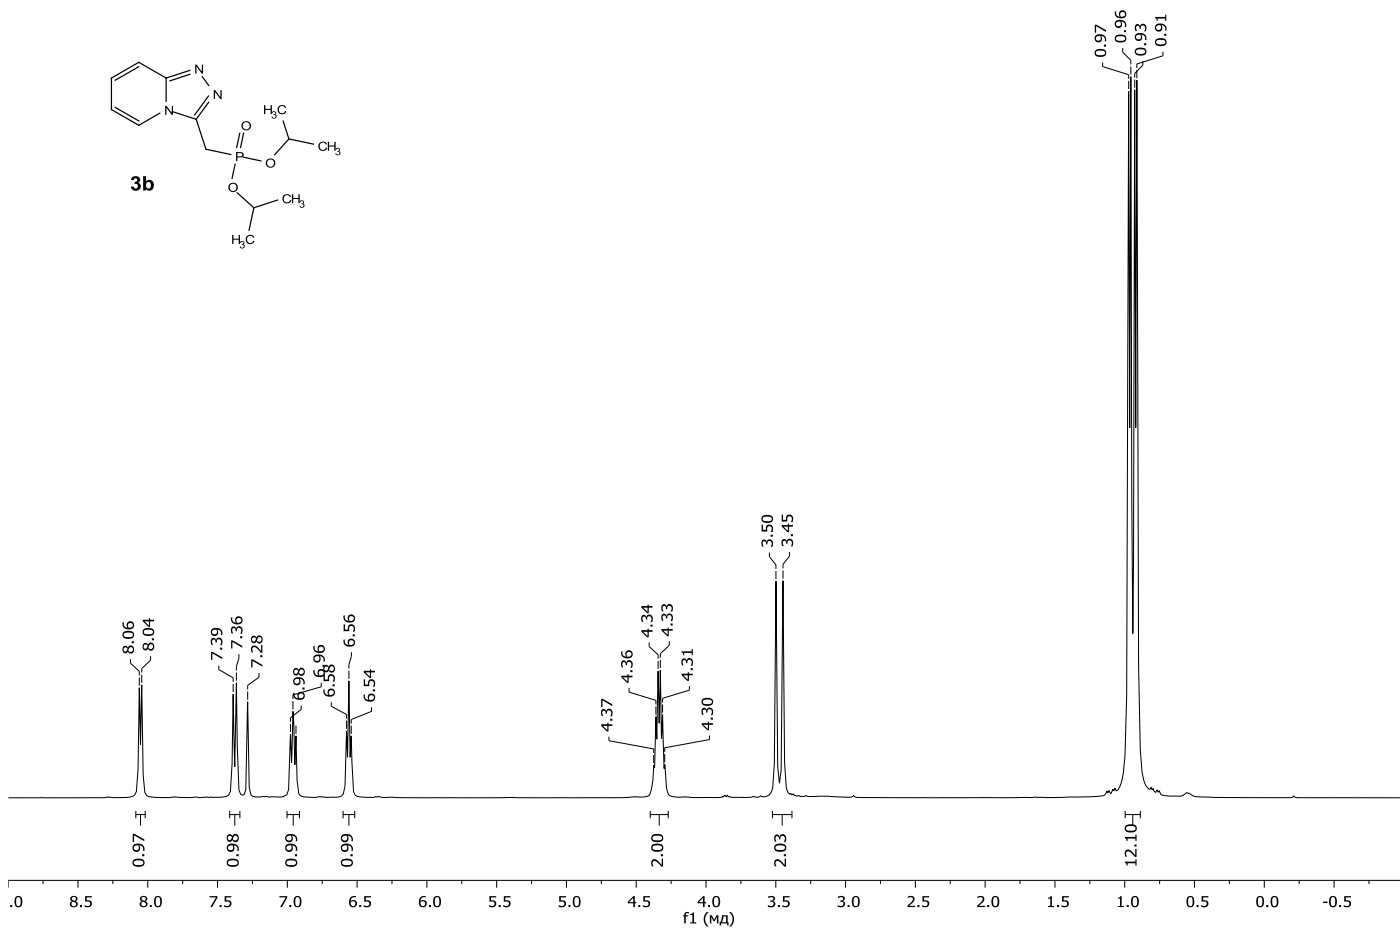

<sup>13</sup>C, 1D, 100.63 Hz  
Chloroform

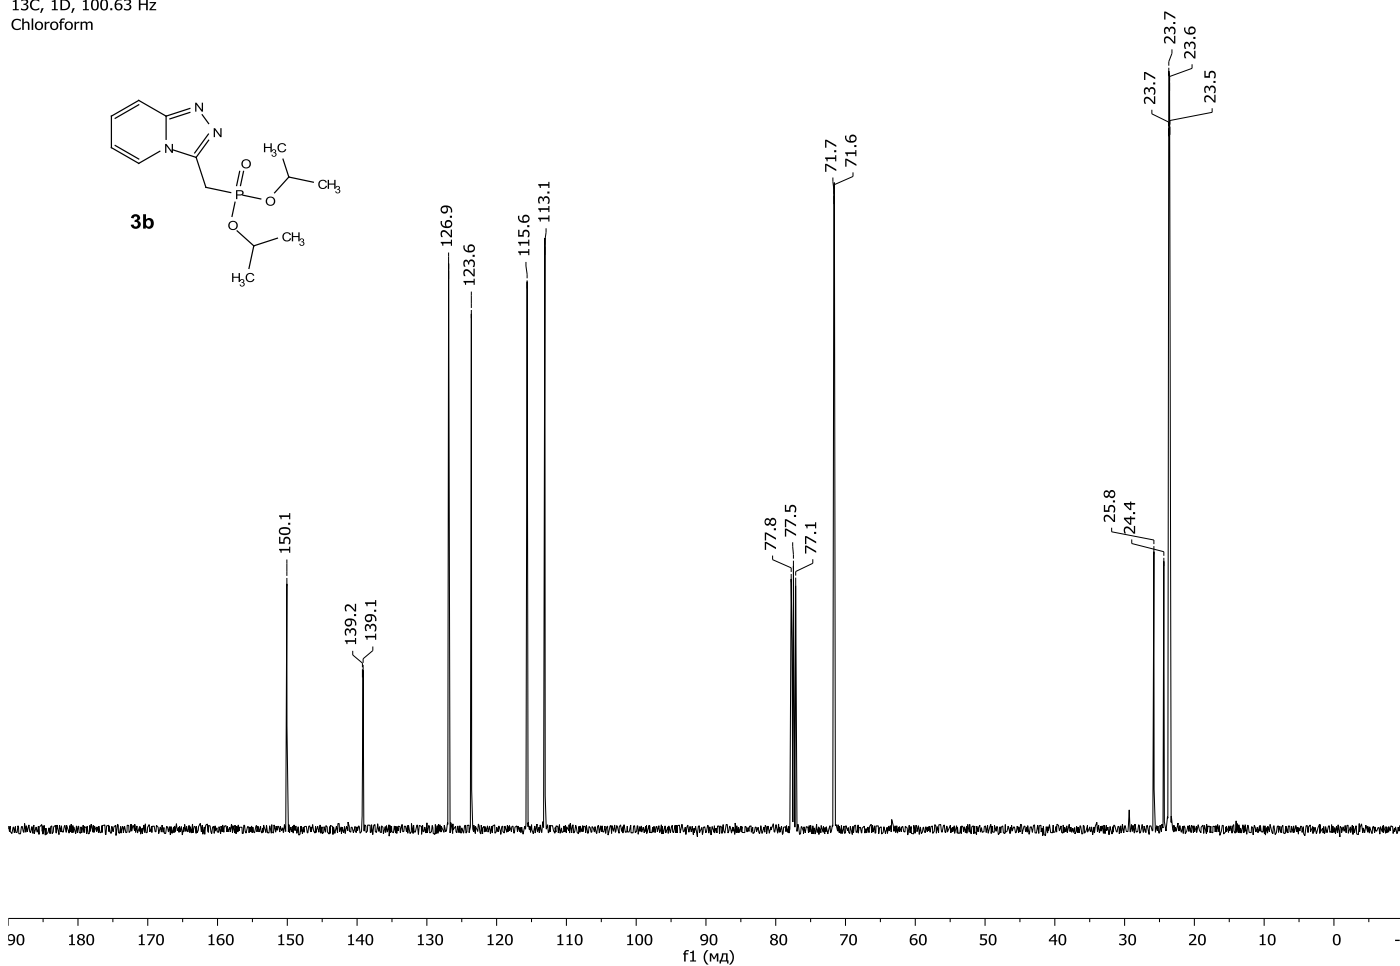

<sup>31</sup>P, 1D, 162.01 Hz  
CDCl<sub>3</sub>

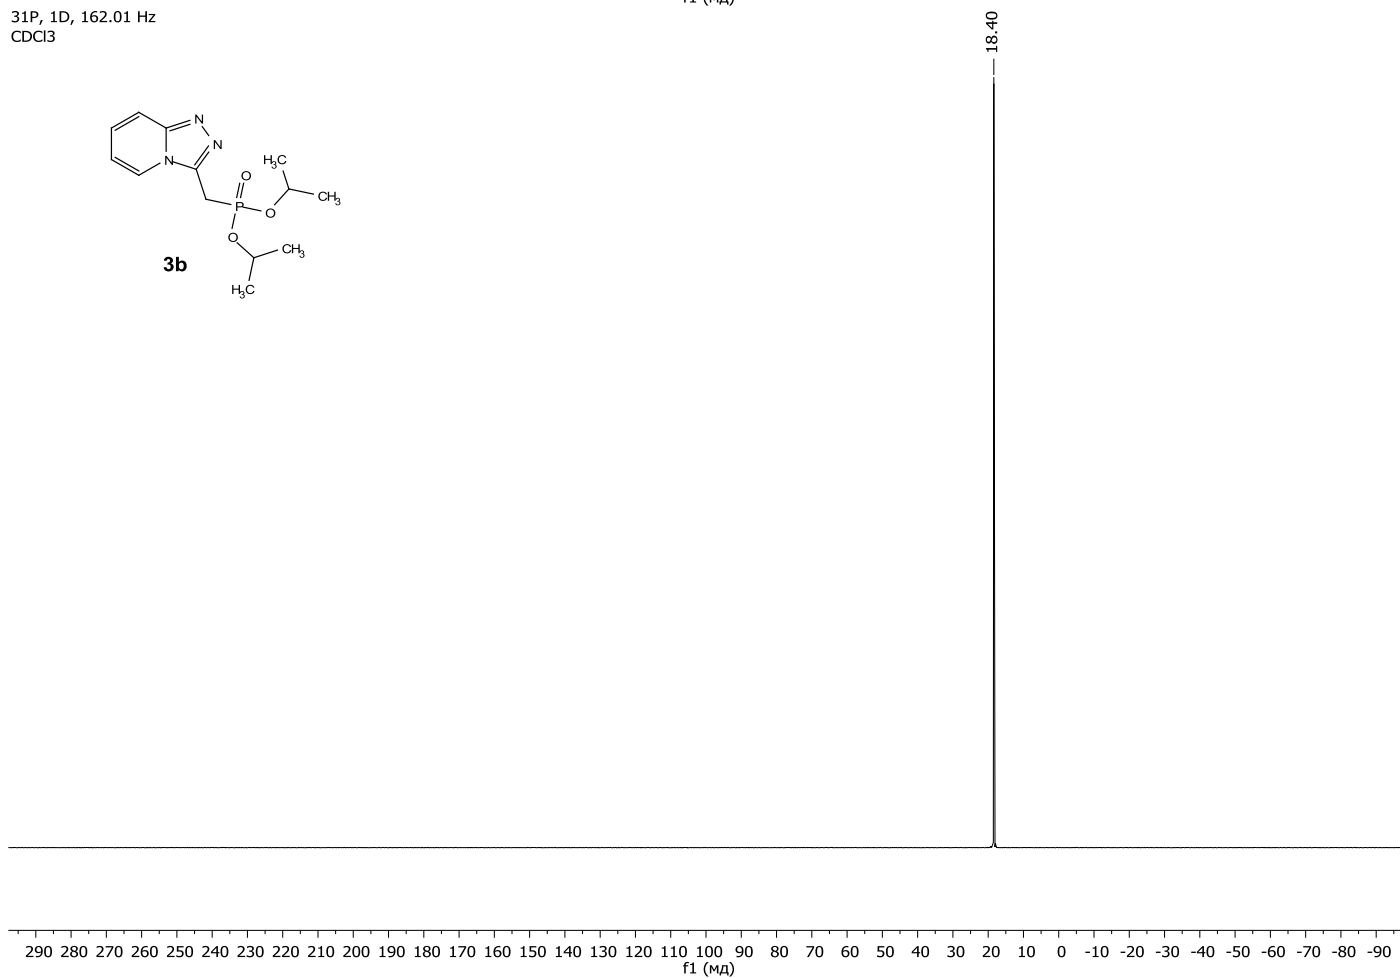

$^1\text{H}$ , 1D, 400.17 Hz  
 $\text{CDCl}_3$

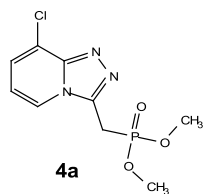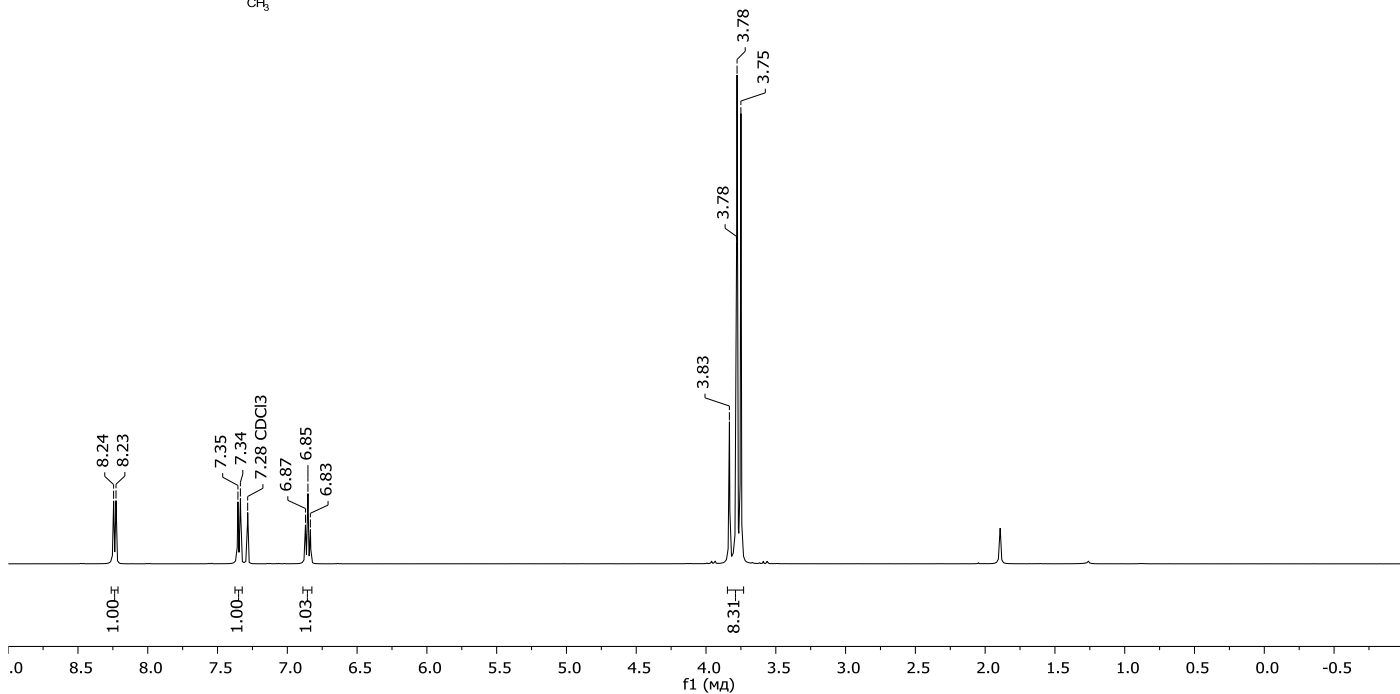

$^{13}\text{C}$ , 1D, 100.63 Hz  
 $\text{CDCl}_3$

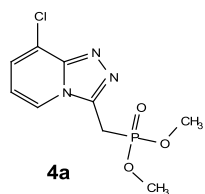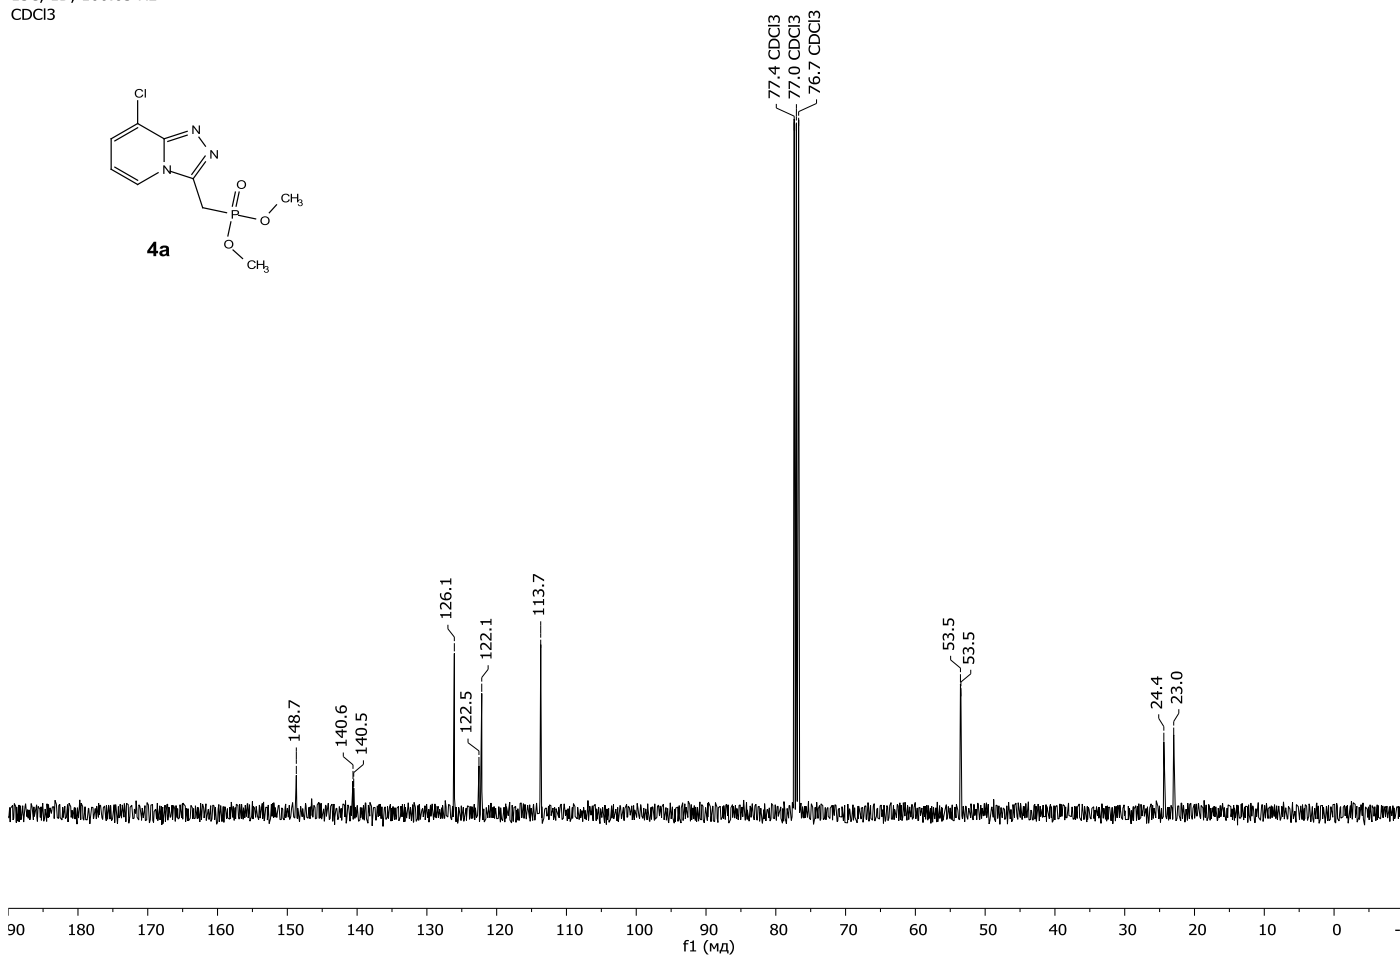

<sup>31</sup>P, 1D, 162.01 Hz  
CDCl<sub>3</sub>

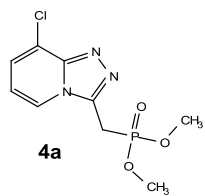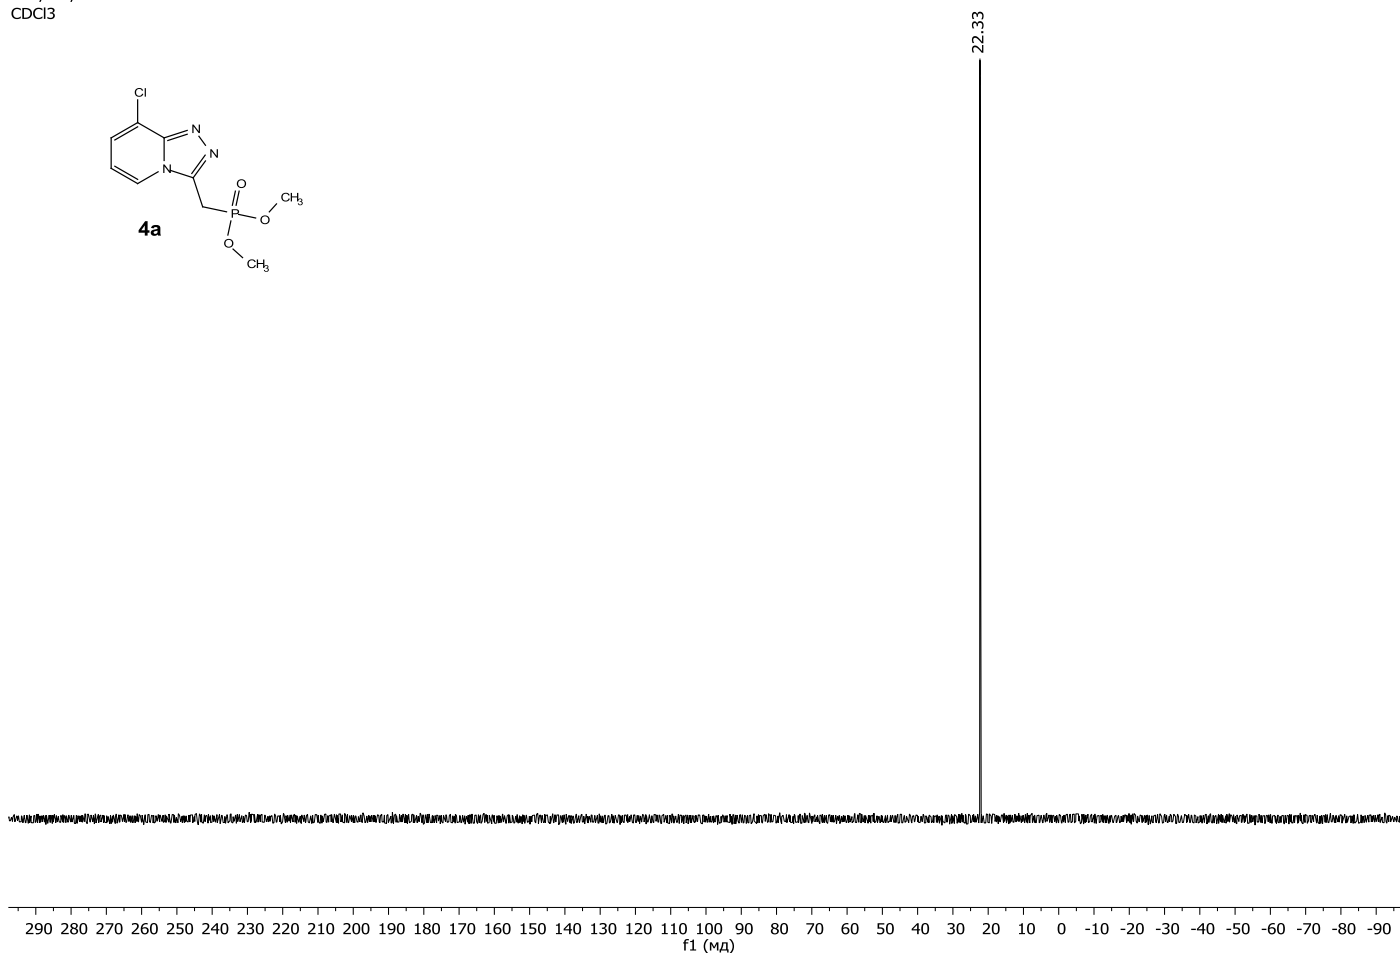

<sup>1</sup>H, 1D, 400.17 Hz  
CDCl<sub>3</sub>

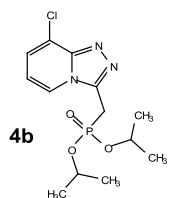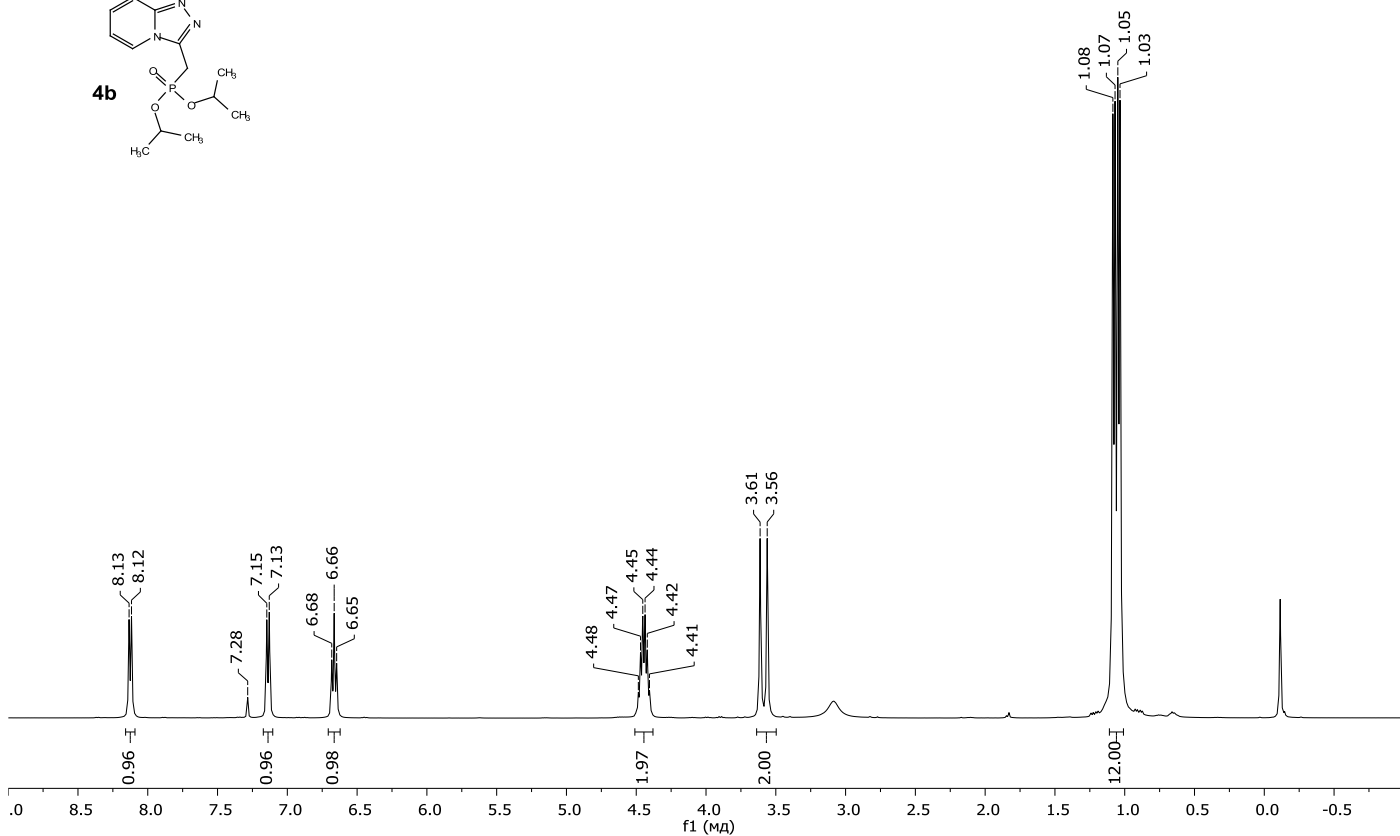

$^{13}\text{C}$ , 1D, 100.63 Hz  
 $\text{CDCl}_3$

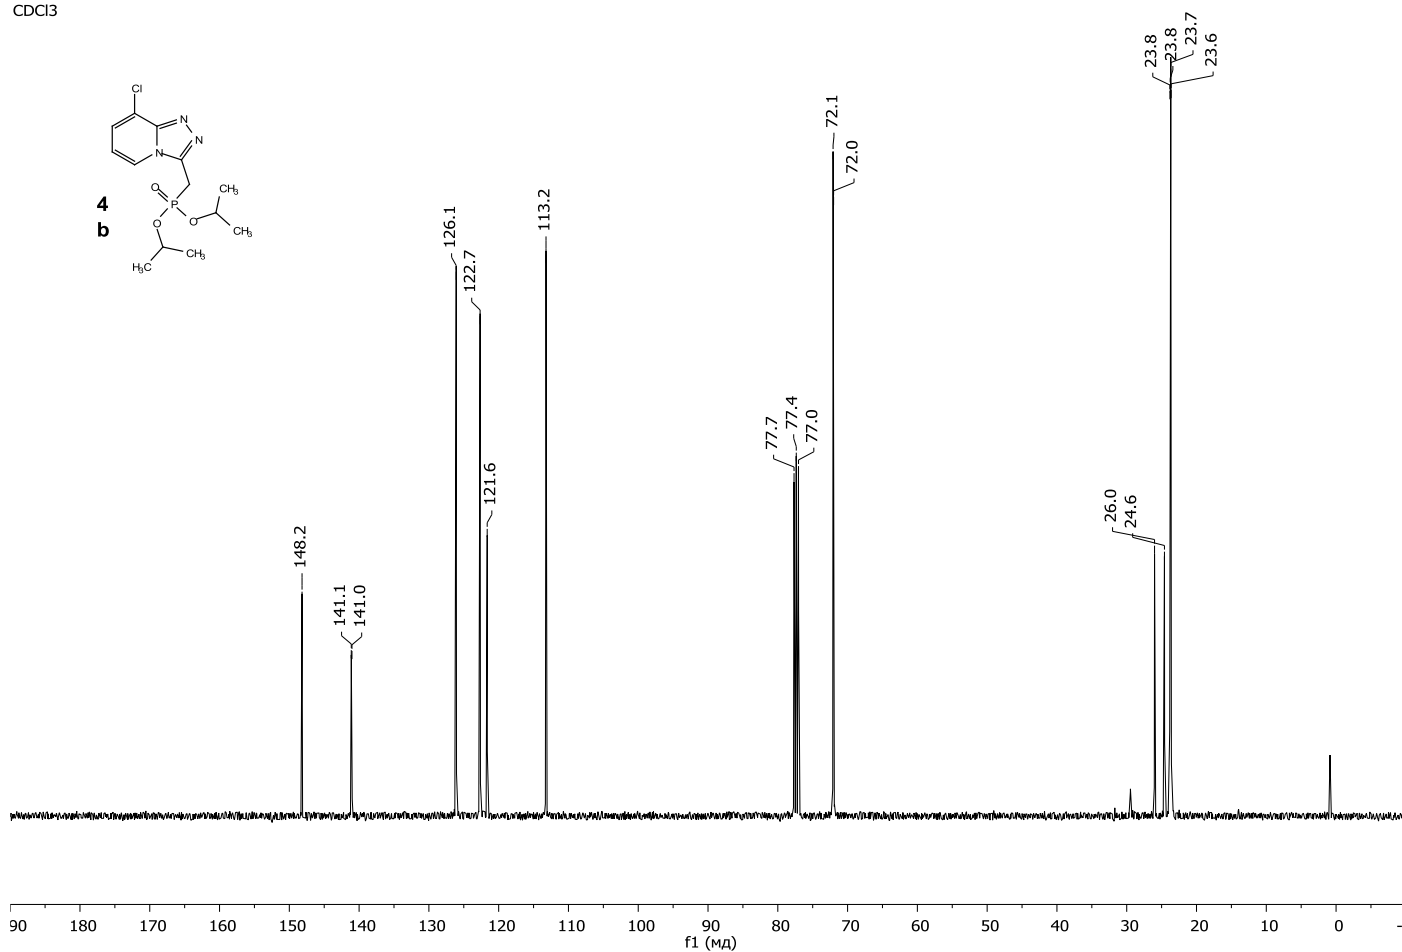

$^{31}\text{P}$ , 1D, 162.01 Hz  
 $\text{CDCl}_3$

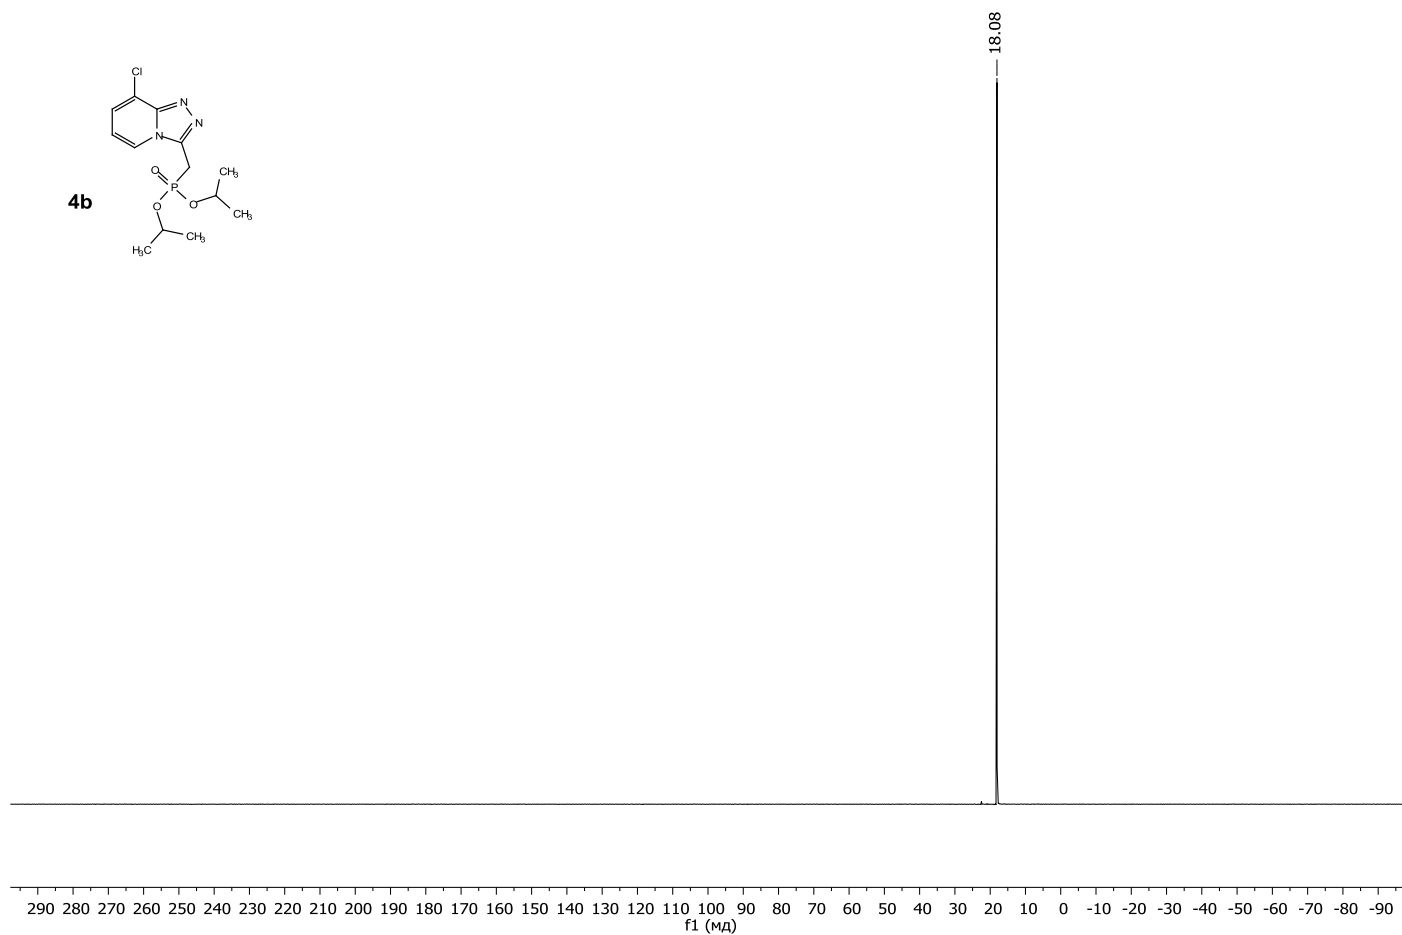

$^1\text{H}$ , 1D, 400.17 Hz  
 $\text{CDCl}_3$

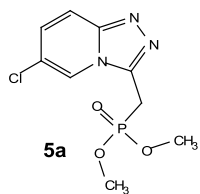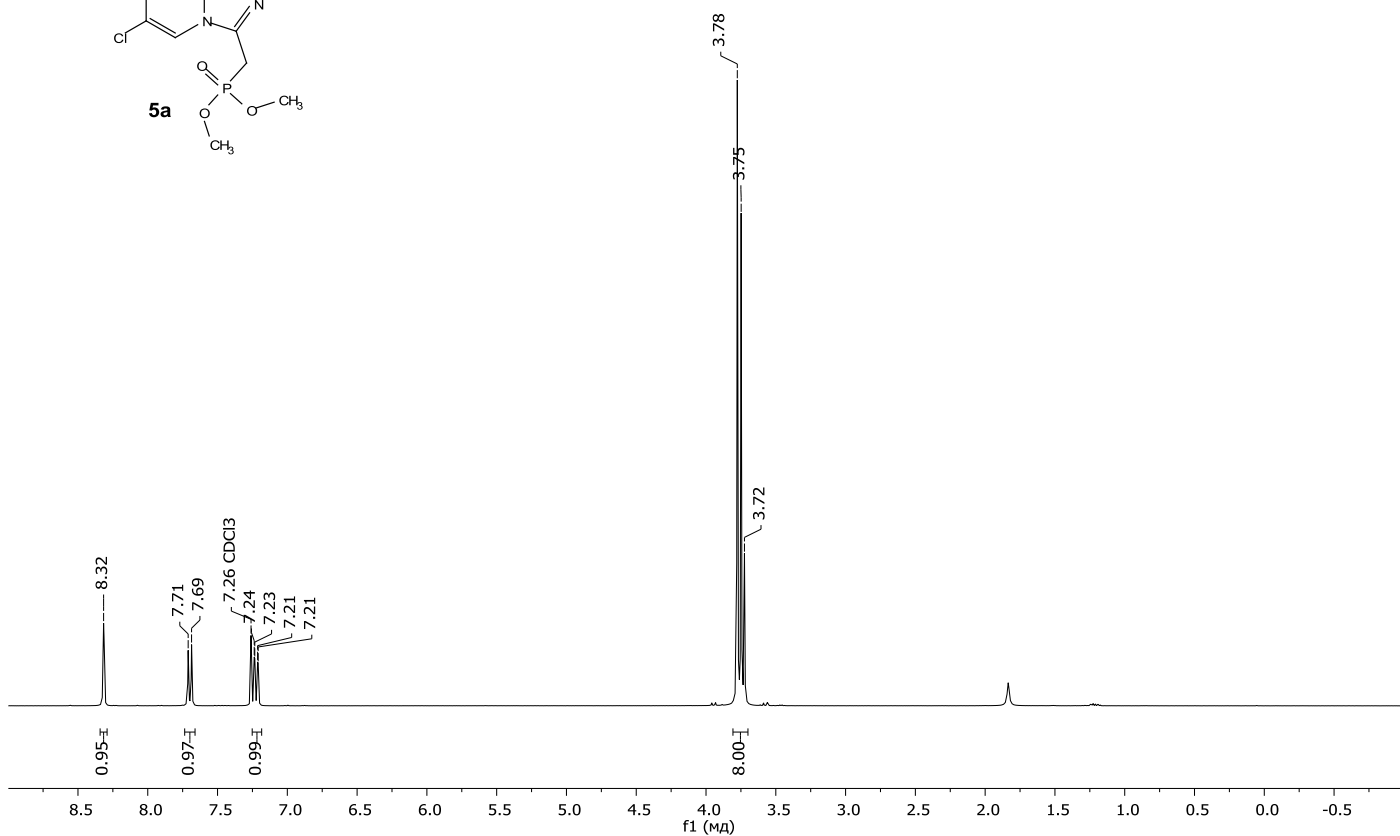

$^{13}\text{C}$ , 1D, 100.63 Hz  
 $\text{CDCl}_3$

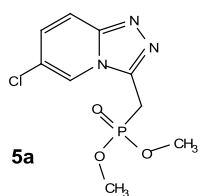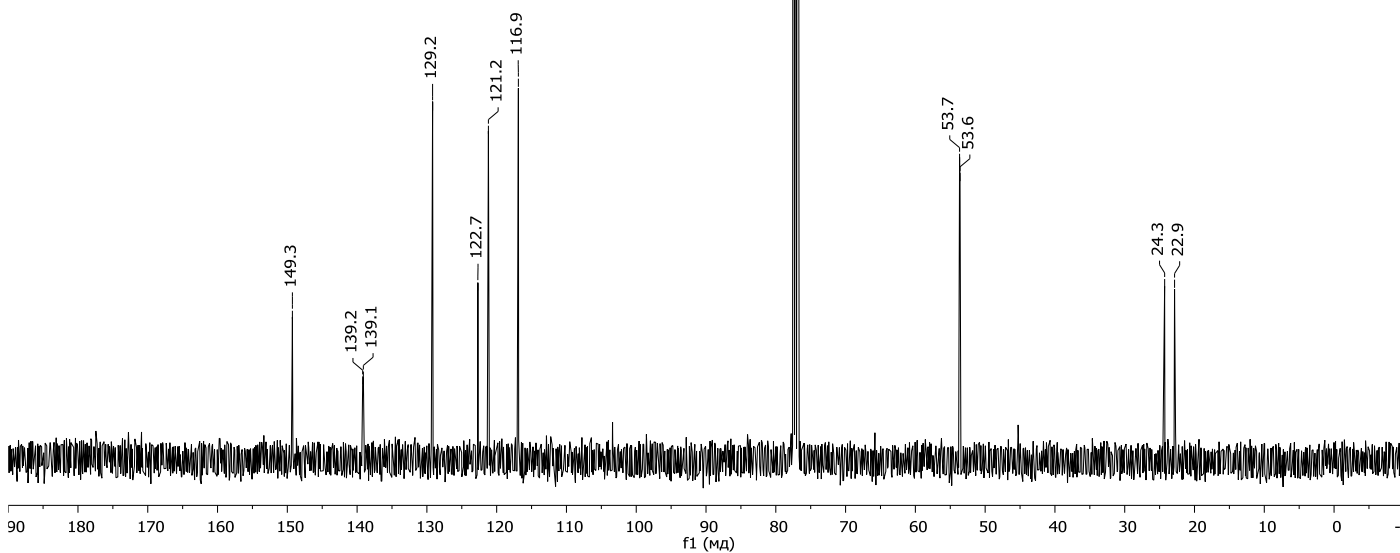

<sup>31</sup>P, 1D, 162.01 Hz  
CDCl<sub>3</sub>

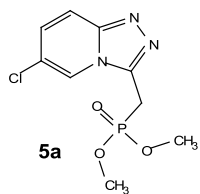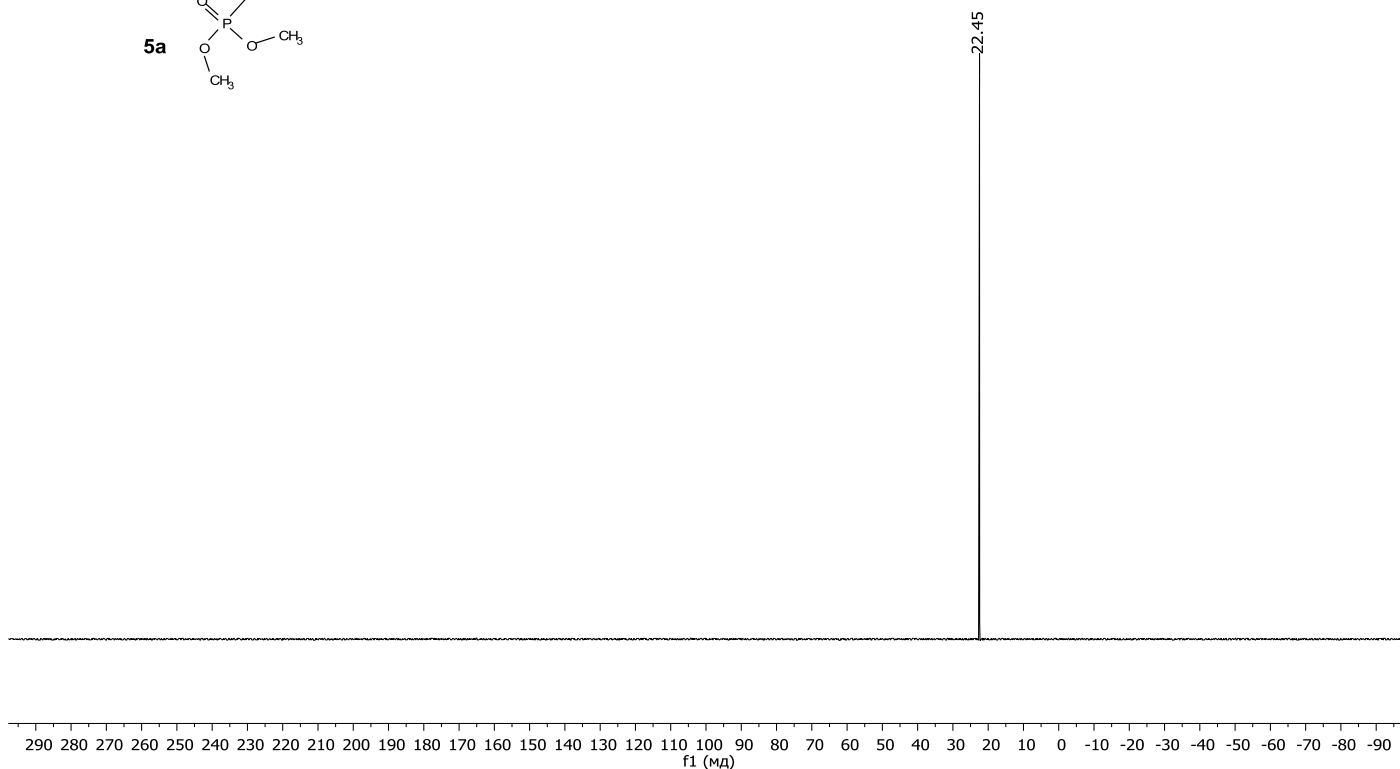

<sup>1</sup>H, 1D, 400.17 Hz  
CDCl<sub>3</sub>

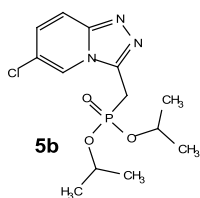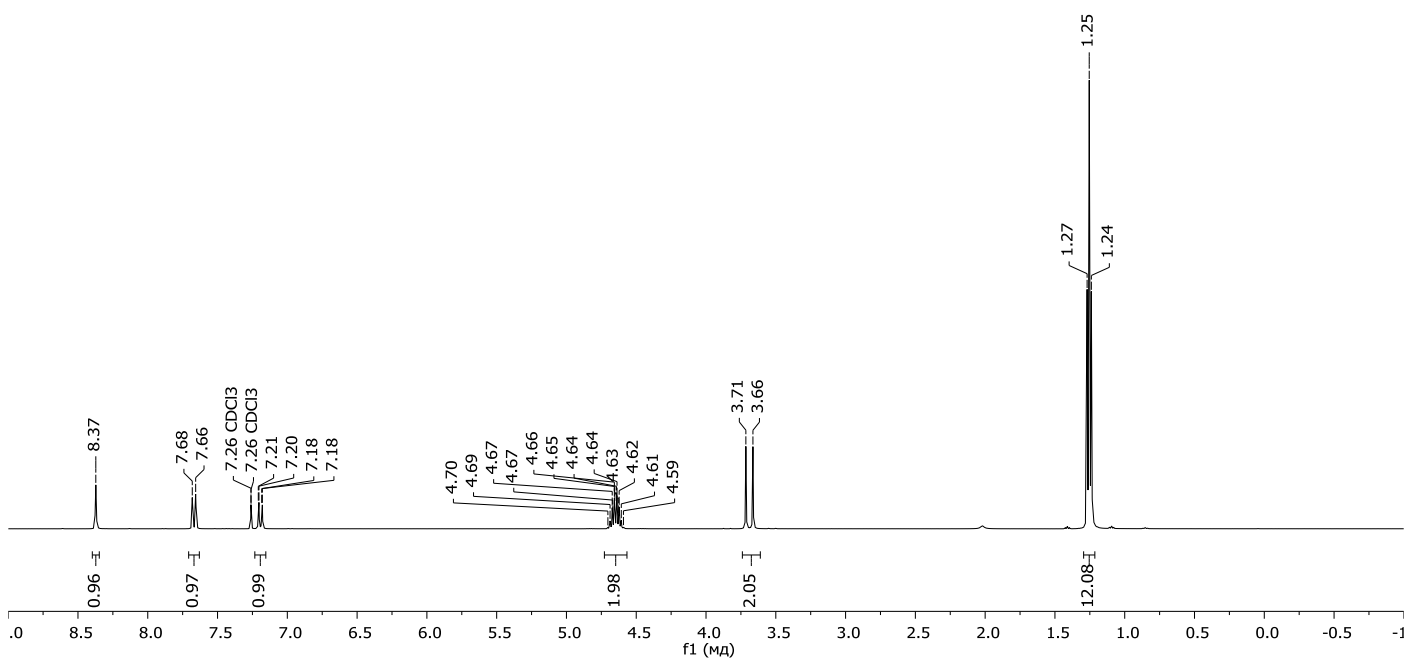

$^{13}\text{C}$ , 1D, 100.63 Hz  
 $\text{CDCl}_3$

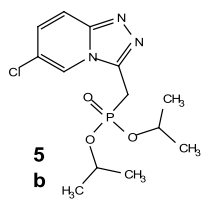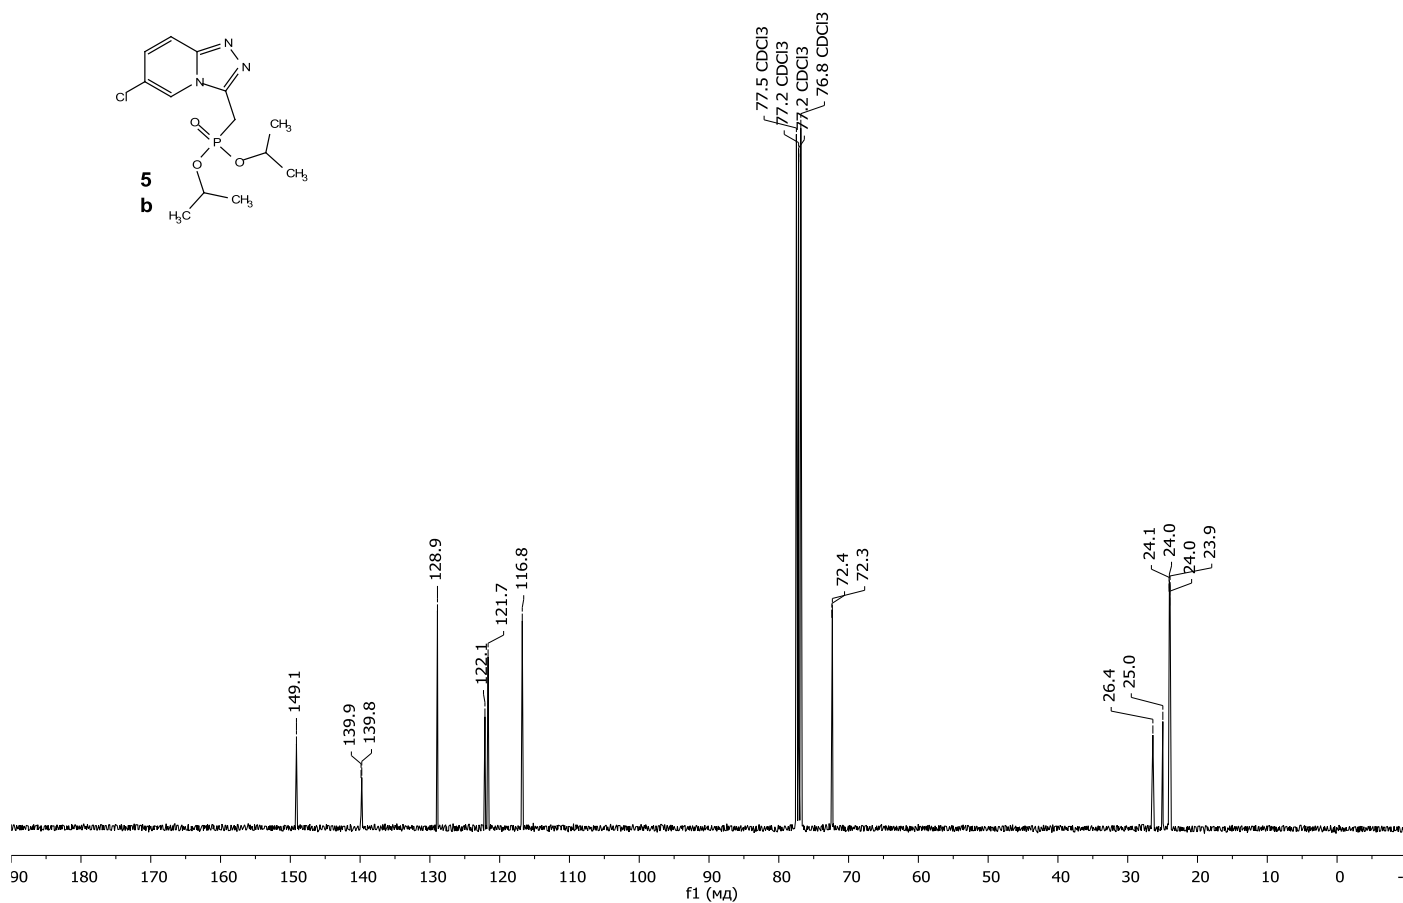

$^{31}\text{P}$ , 1D, 162.01 Hz  
 $\text{CDCl}_3$

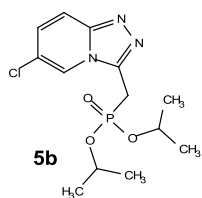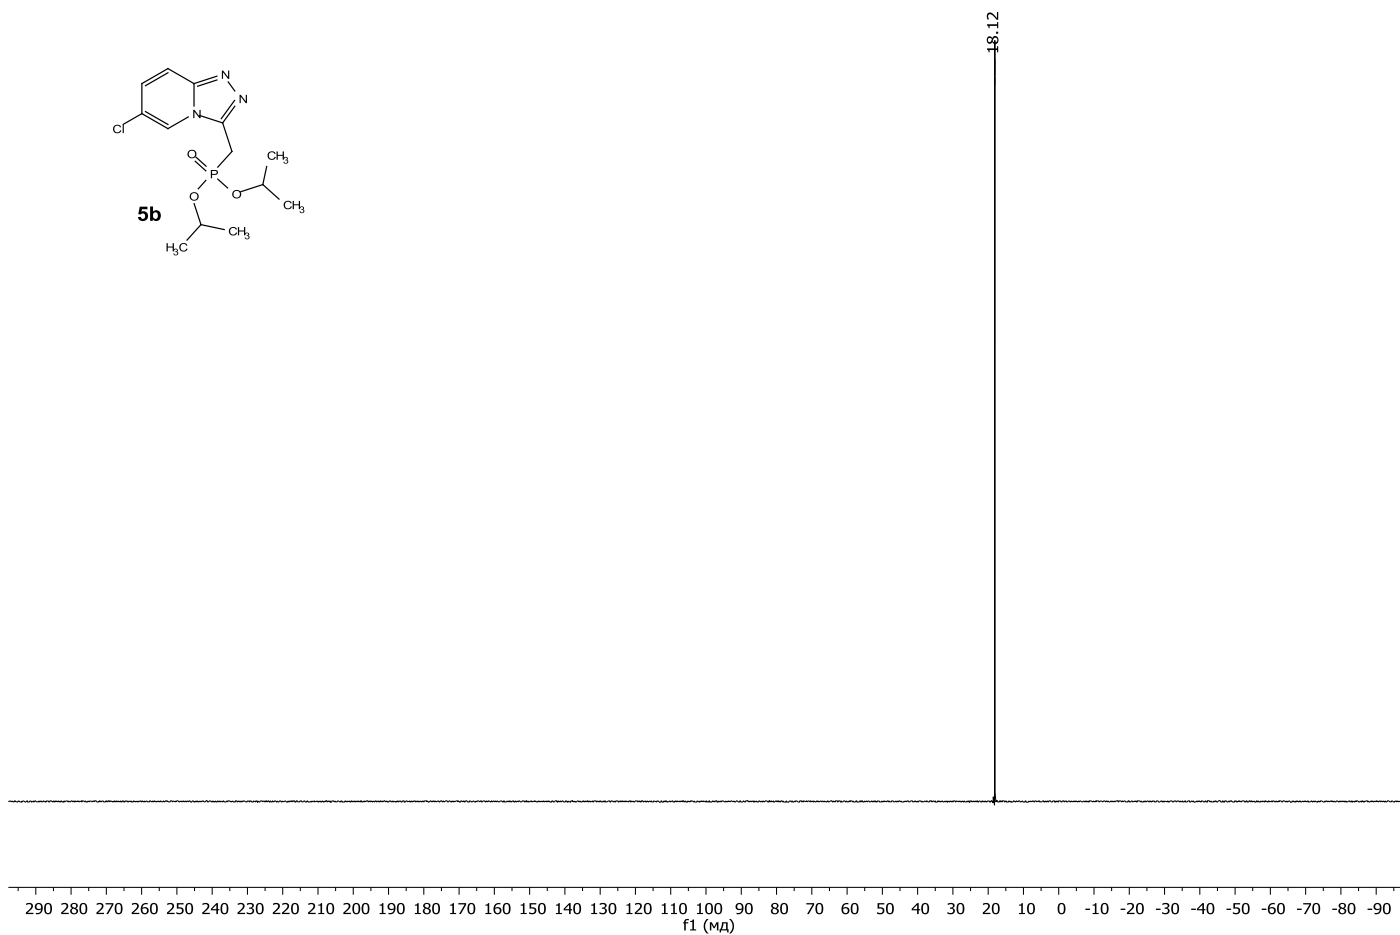

$^1\text{H}$ , 1D, 400.17 Hz  
 $\text{CDCl}_3$

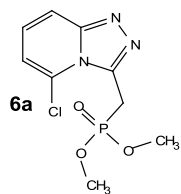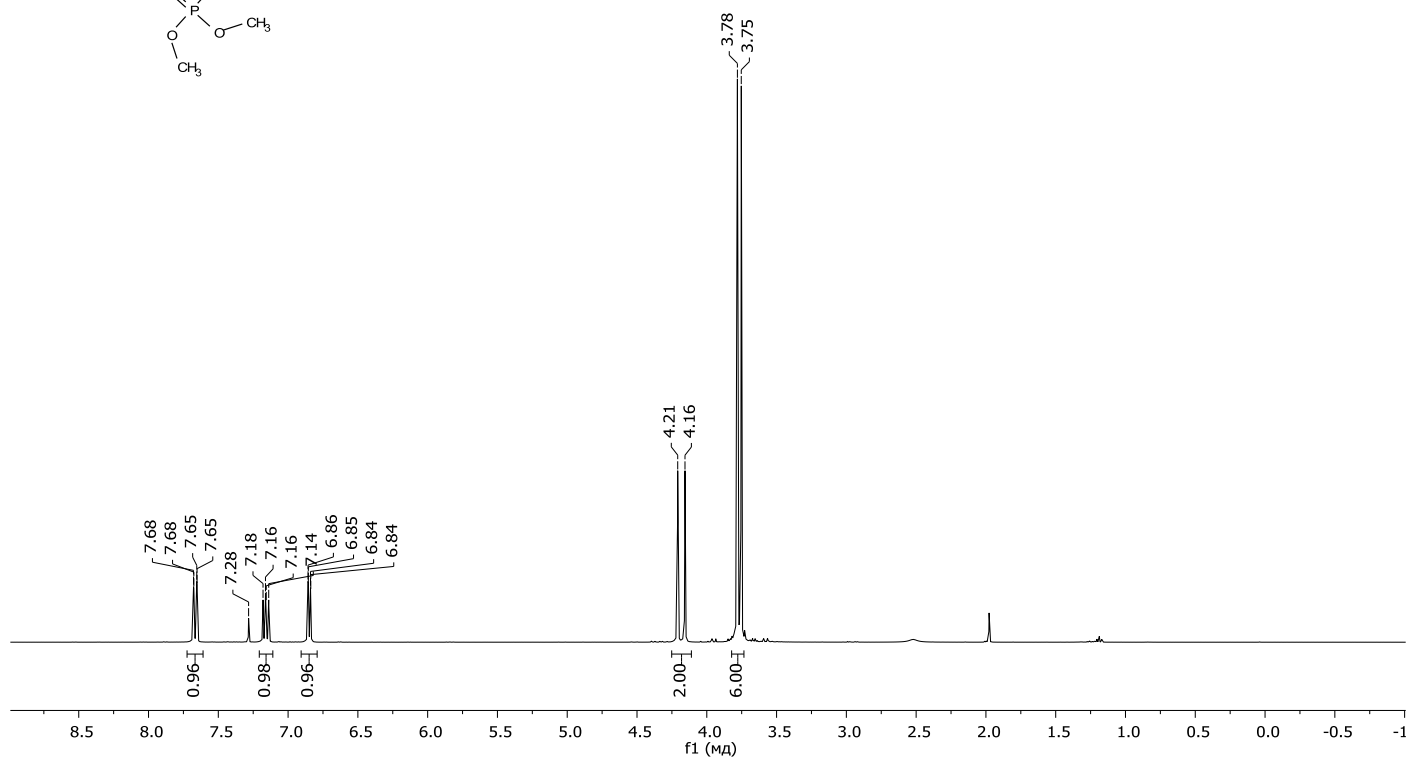

$^{13}\text{C}$ , 1D, 100.63 Hz  
 $\text{CDCl}_3$

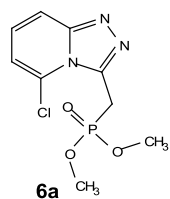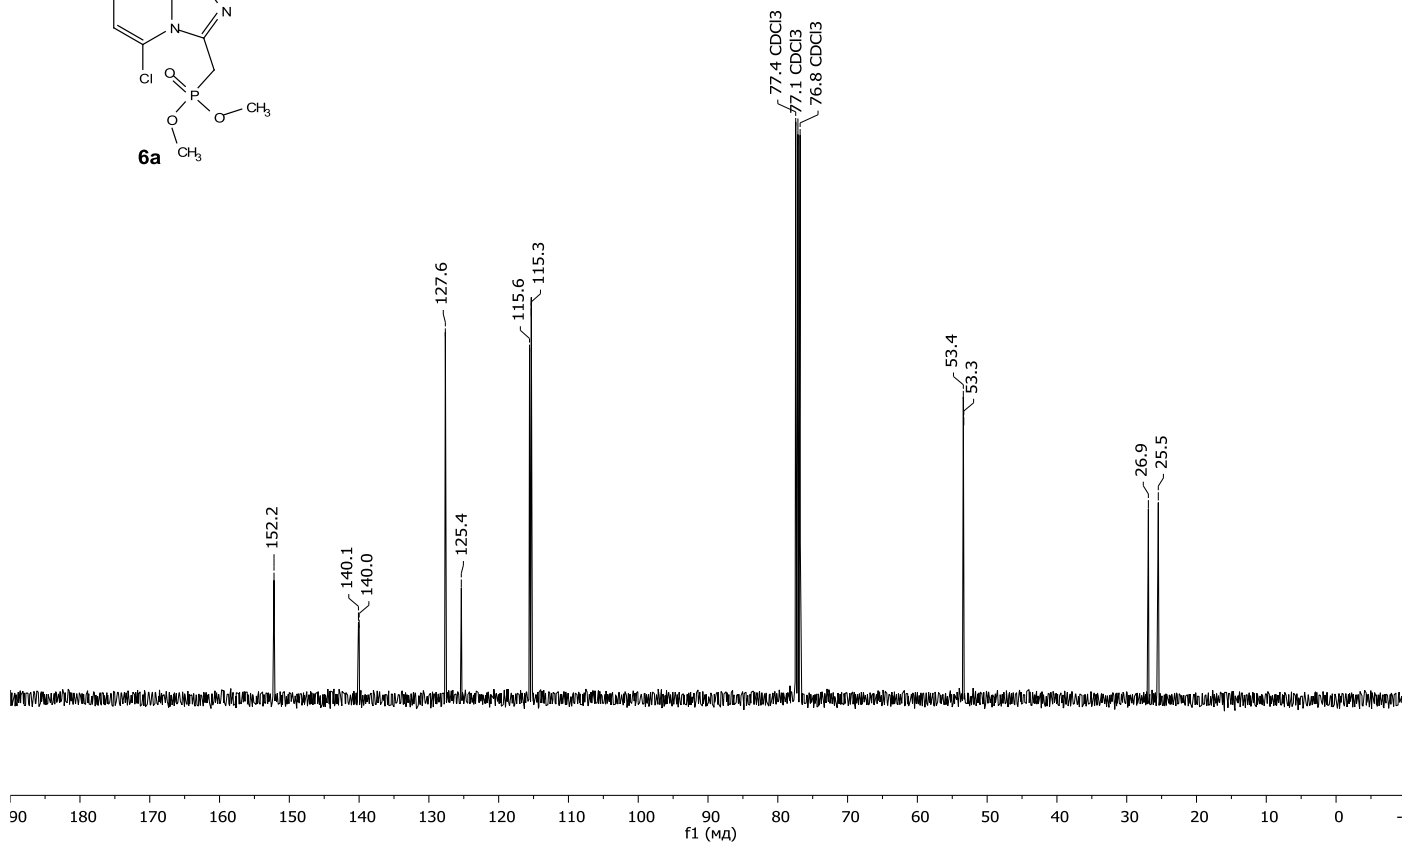

<sup>31</sup>P, 1D, 162.01 Hz  
CDCl<sub>3</sub>

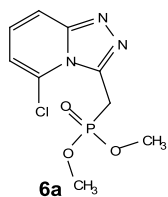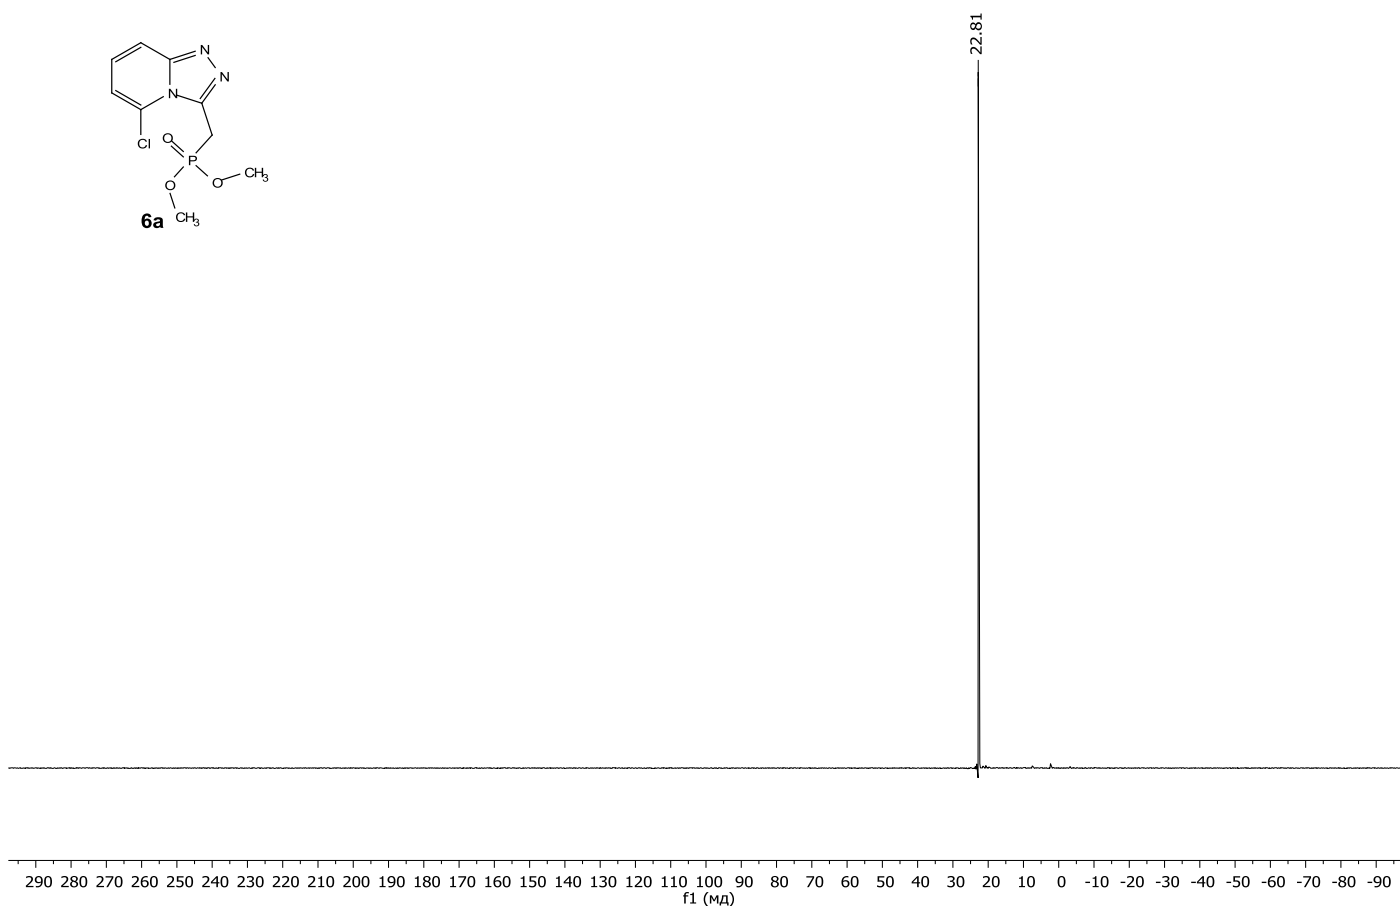

<sup>1</sup>H, 1D, 400.17 Hz  
CDCl<sub>3</sub>

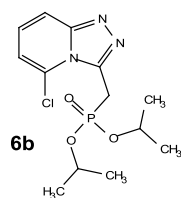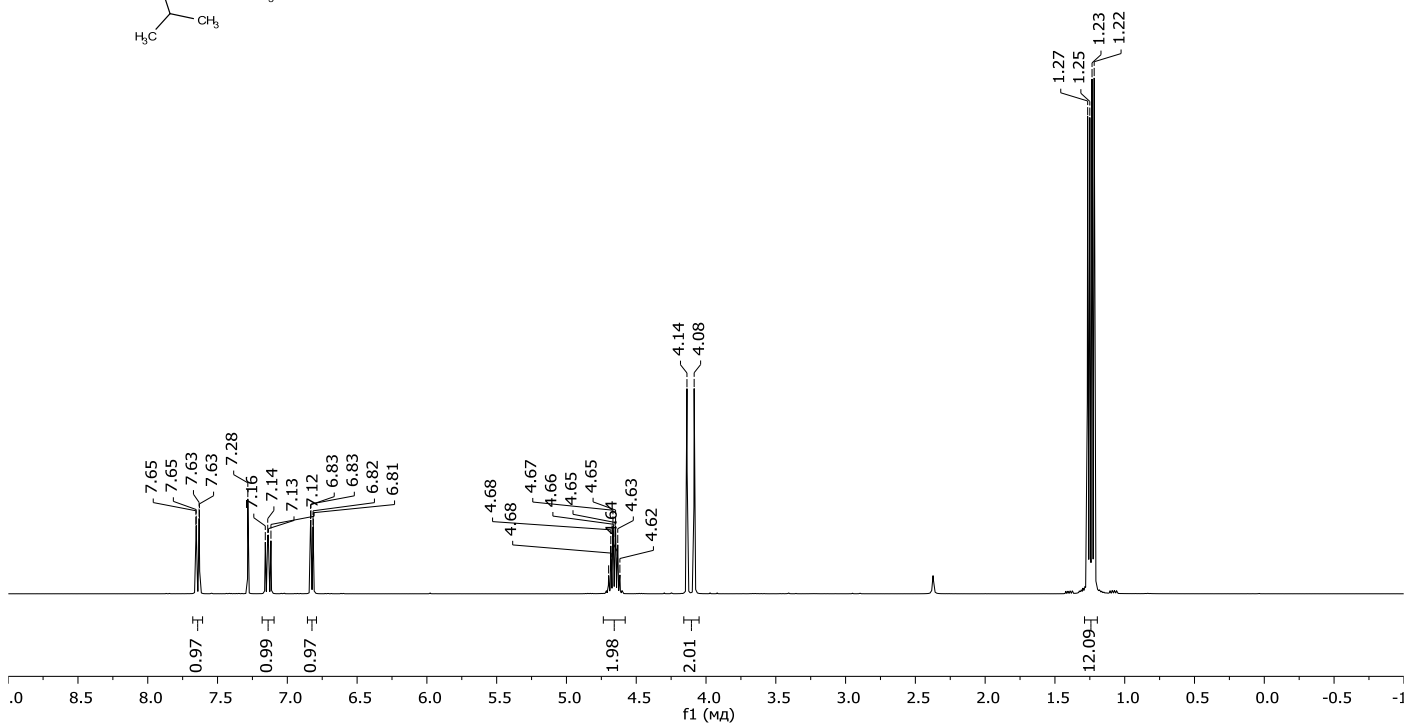

$^{13}\text{C}$ , 1D, 100.63 Hz  
 $\text{CDCl}_3$

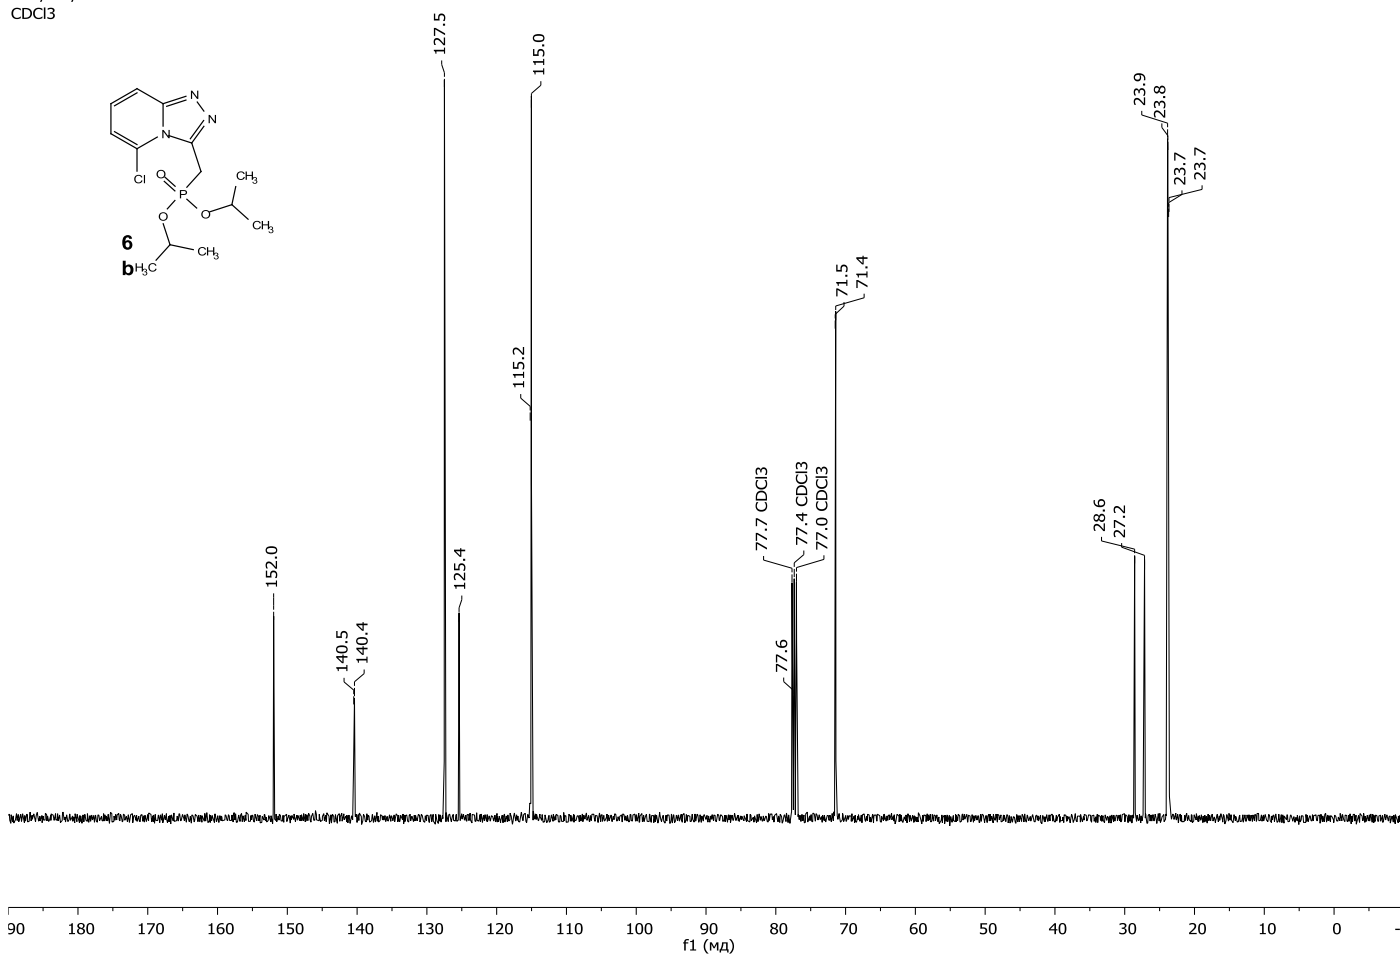

$^{31}\text{P}$ , 1D, 162.01 Hz  
 $\text{CDCl}_3$

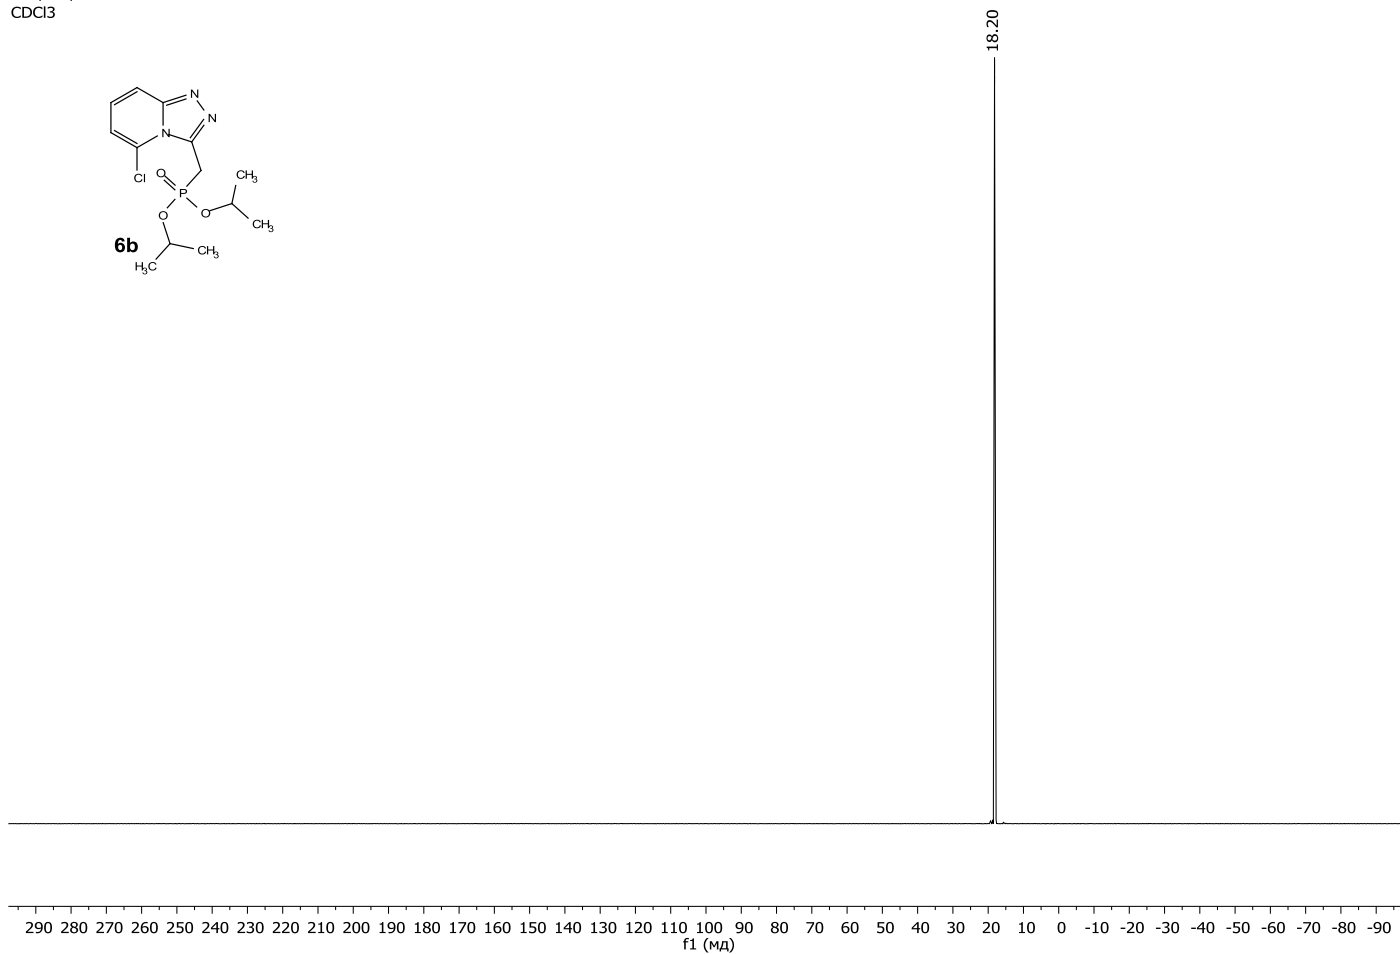

$^1\text{H}$ , 1D, 400.17 Hz  
 $\text{CDCl}_3$

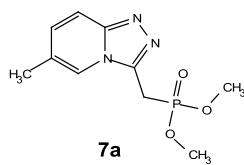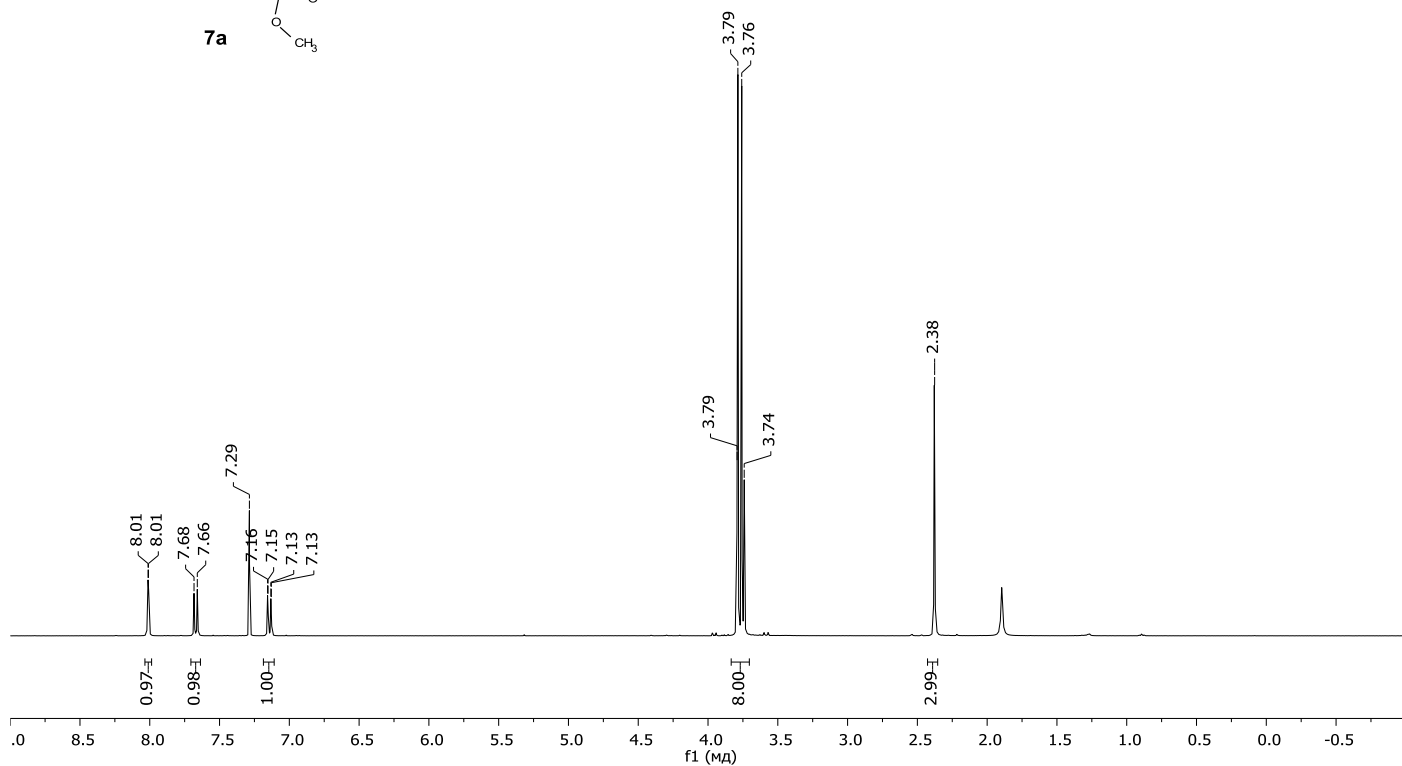

$^{13}\text{C}$ , 1D, 100.63 Hz  
 $\text{CDCl}_3$

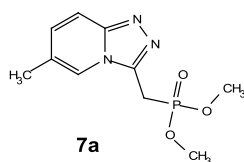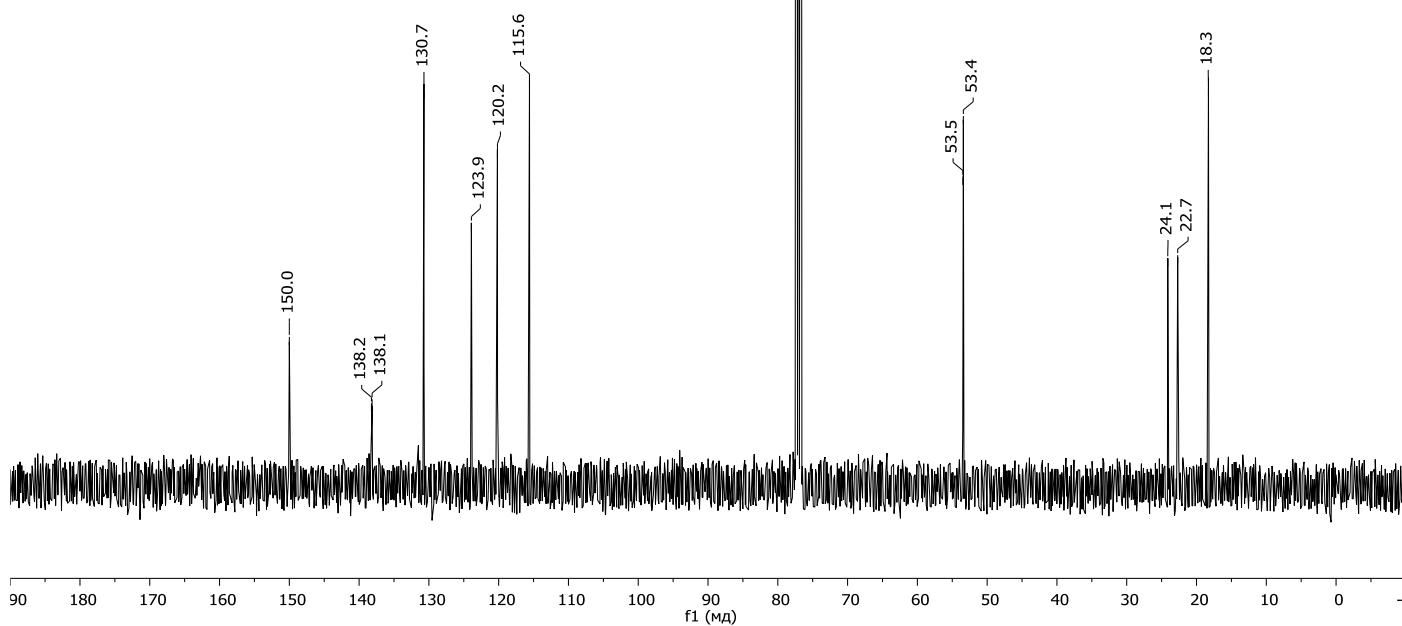

31P, 1D, 162.01 Hz  
CDCl<sub>3</sub>

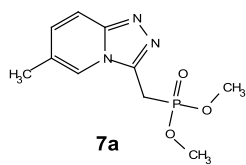

22.92

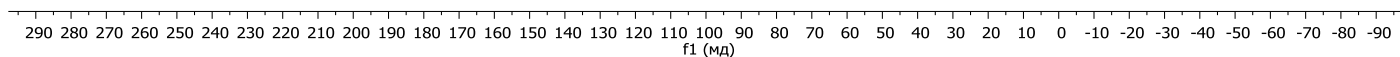

1H, 1D, 400.17 Hz  
CDCl<sub>3</sub>

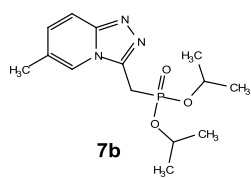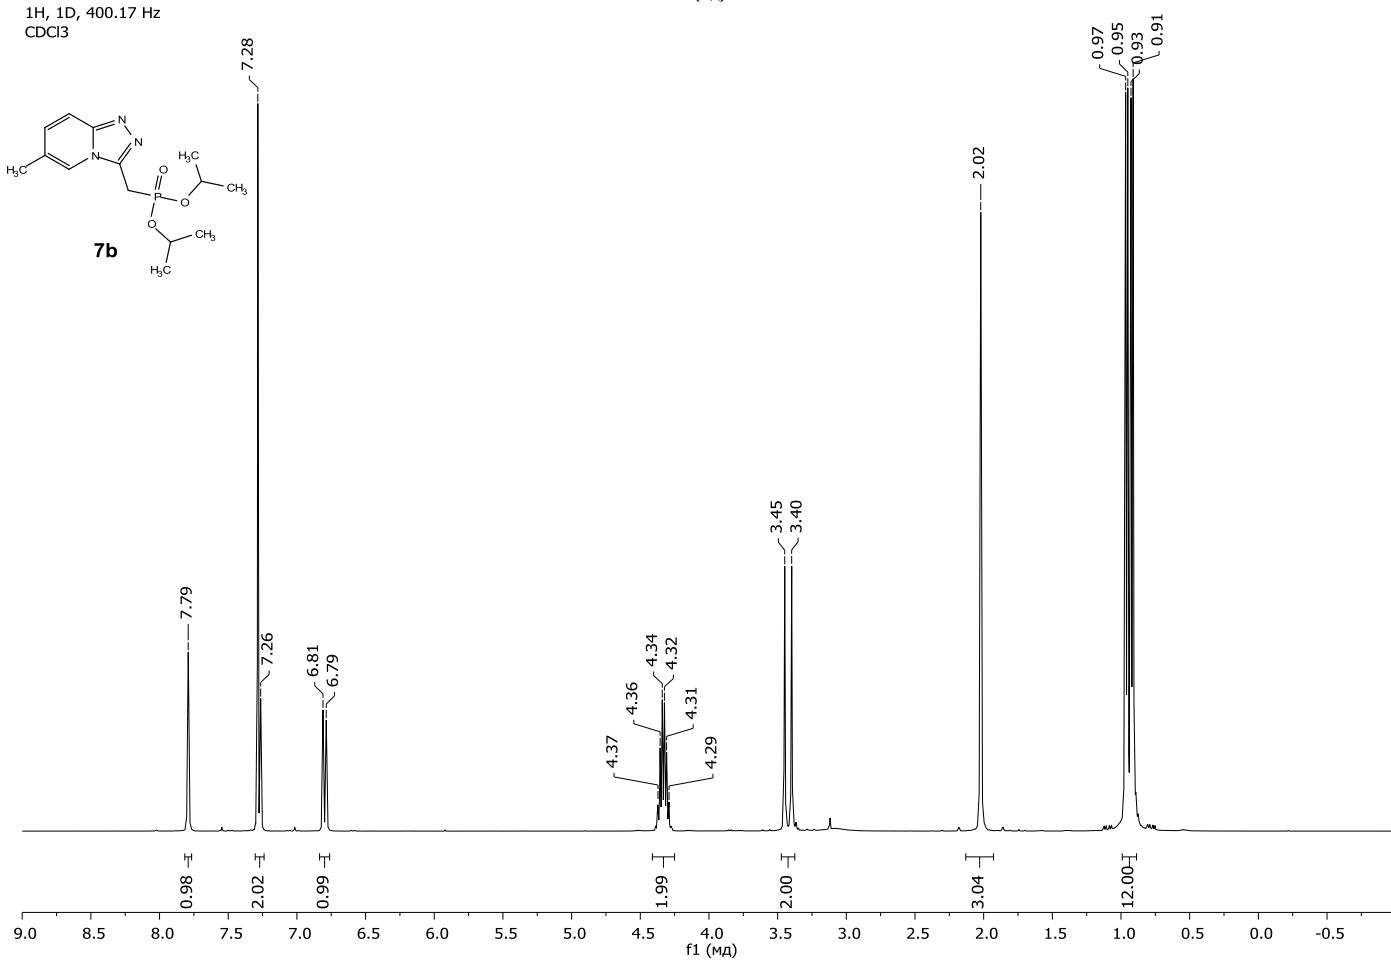

$^{13}\text{C}$ , 1D, 100.63 Hz  
 $\text{CDCl}_3$

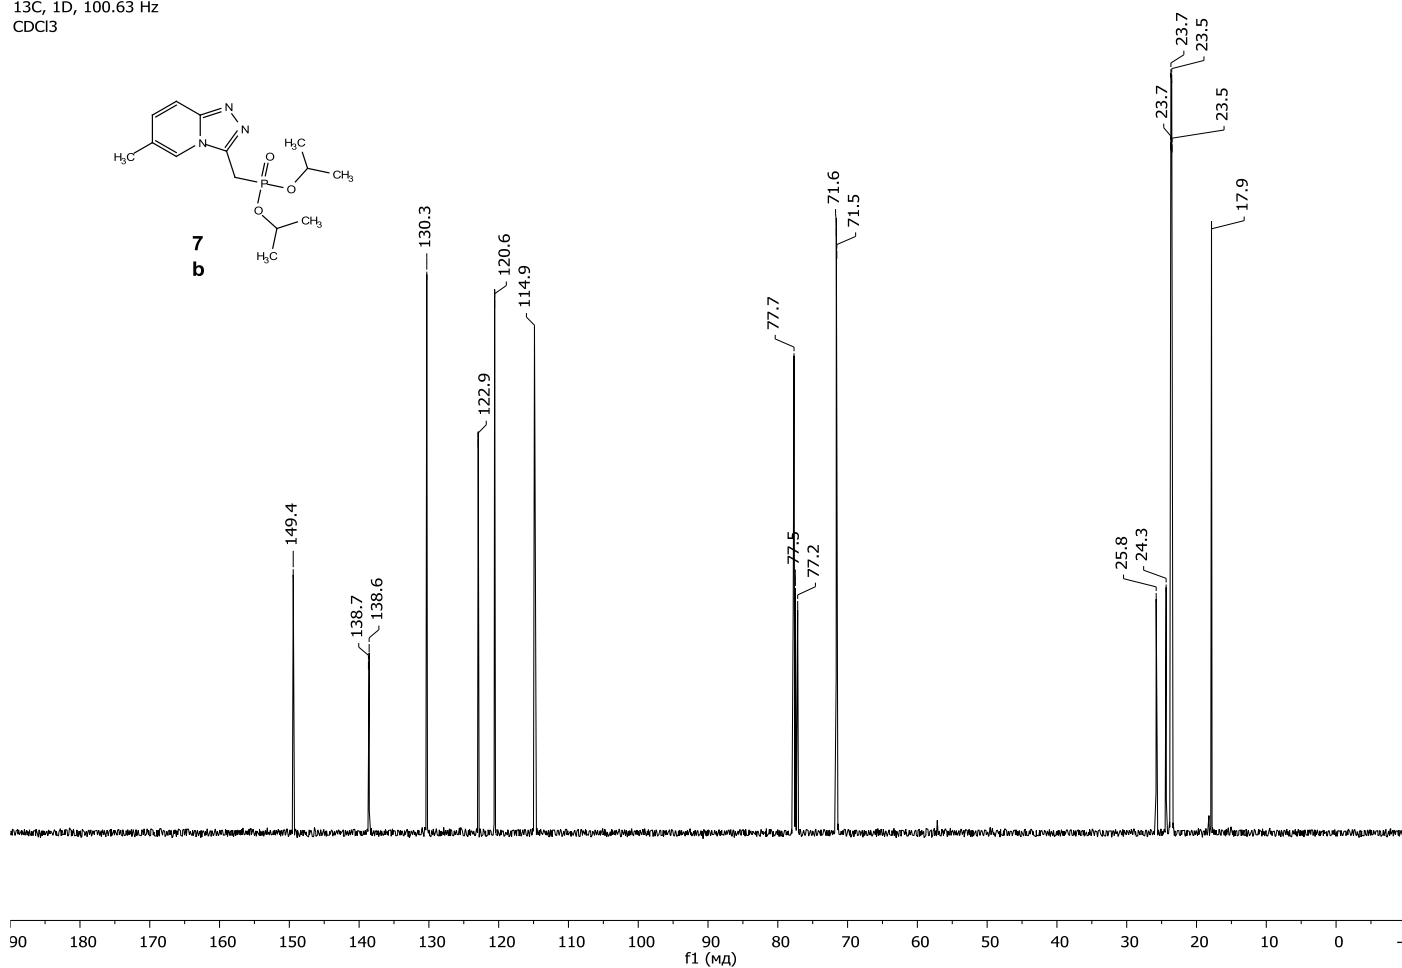

$^{31}\text{P}$ , 1D, 162.01 Hz  
 $\text{CDCl}_3$

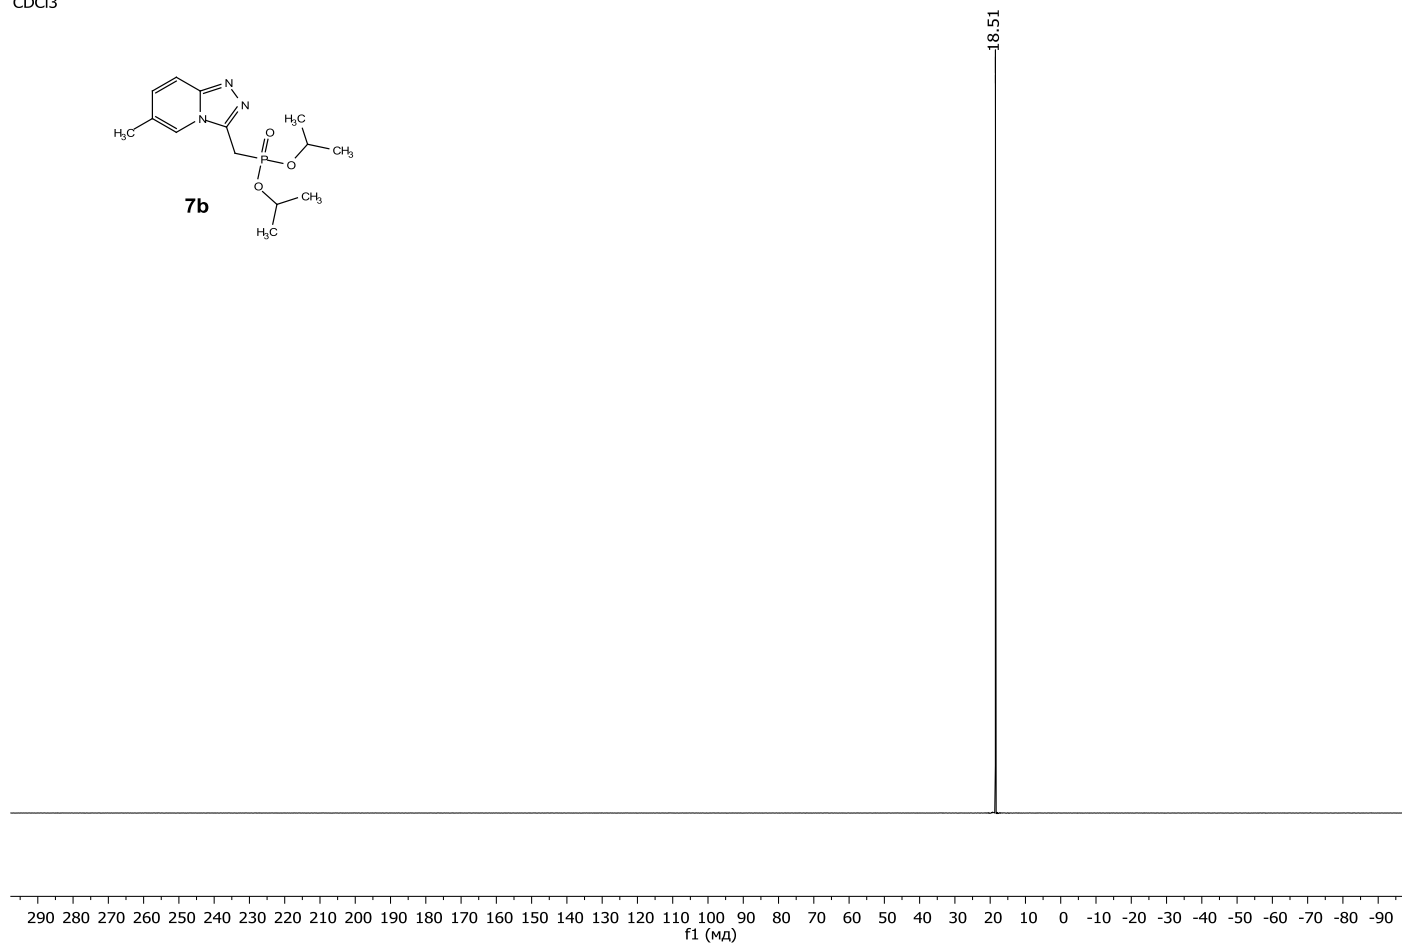

<sup>1</sup>H, 1D, 400.17 Hz  
CDCl<sub>3</sub>

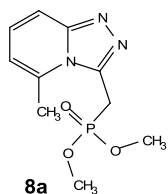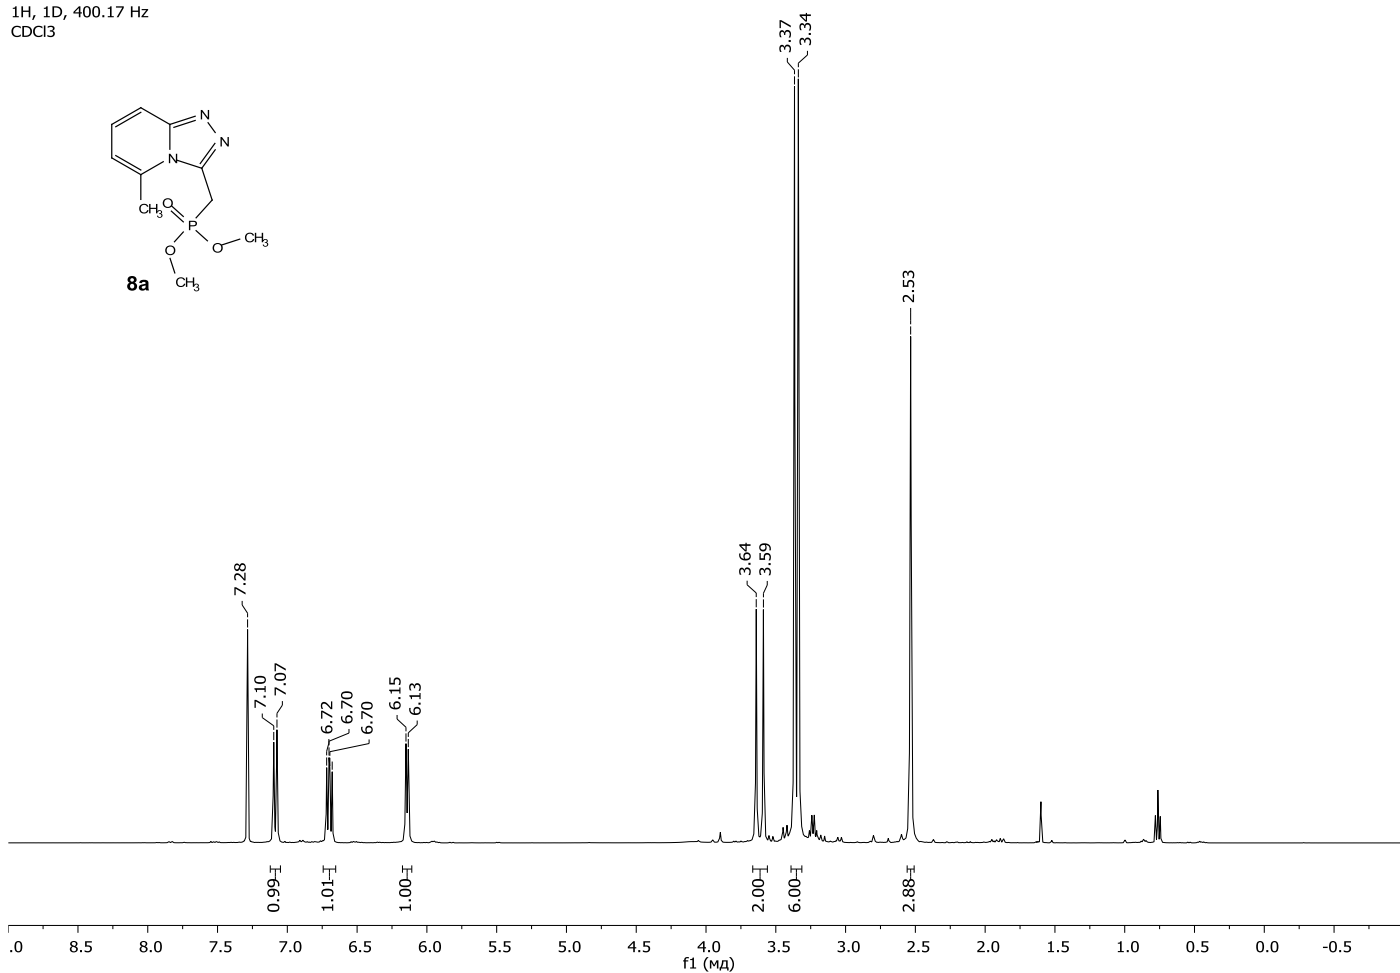

<sup>13</sup>C, 1D, 100.63 Hz  
CDCl<sub>3</sub>

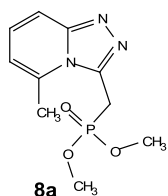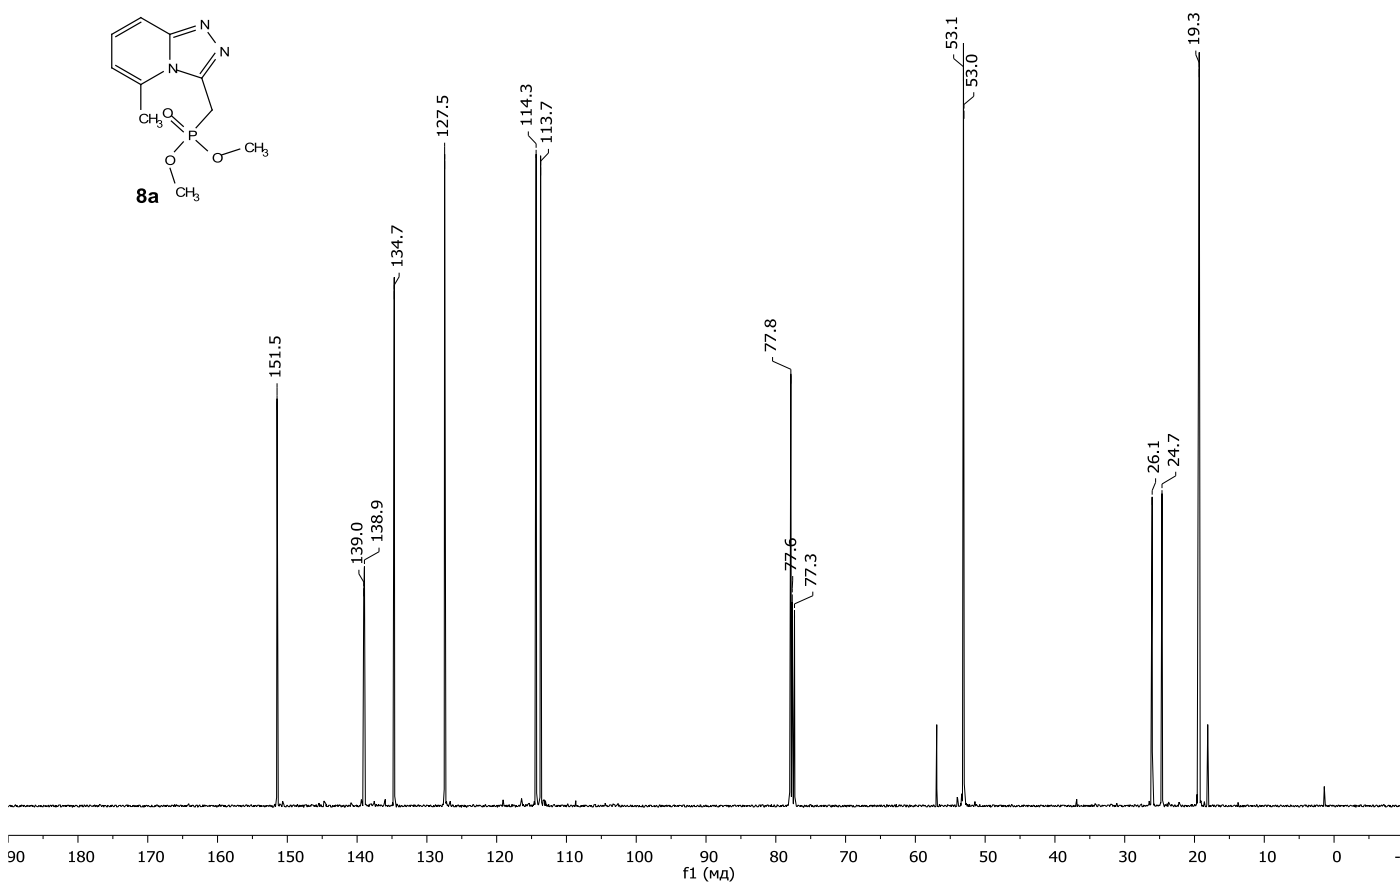

$^{31}\text{P}$ , 1D, 162.01 Hz  
 $\text{CDCl}_3$

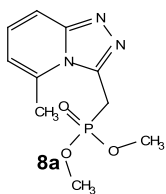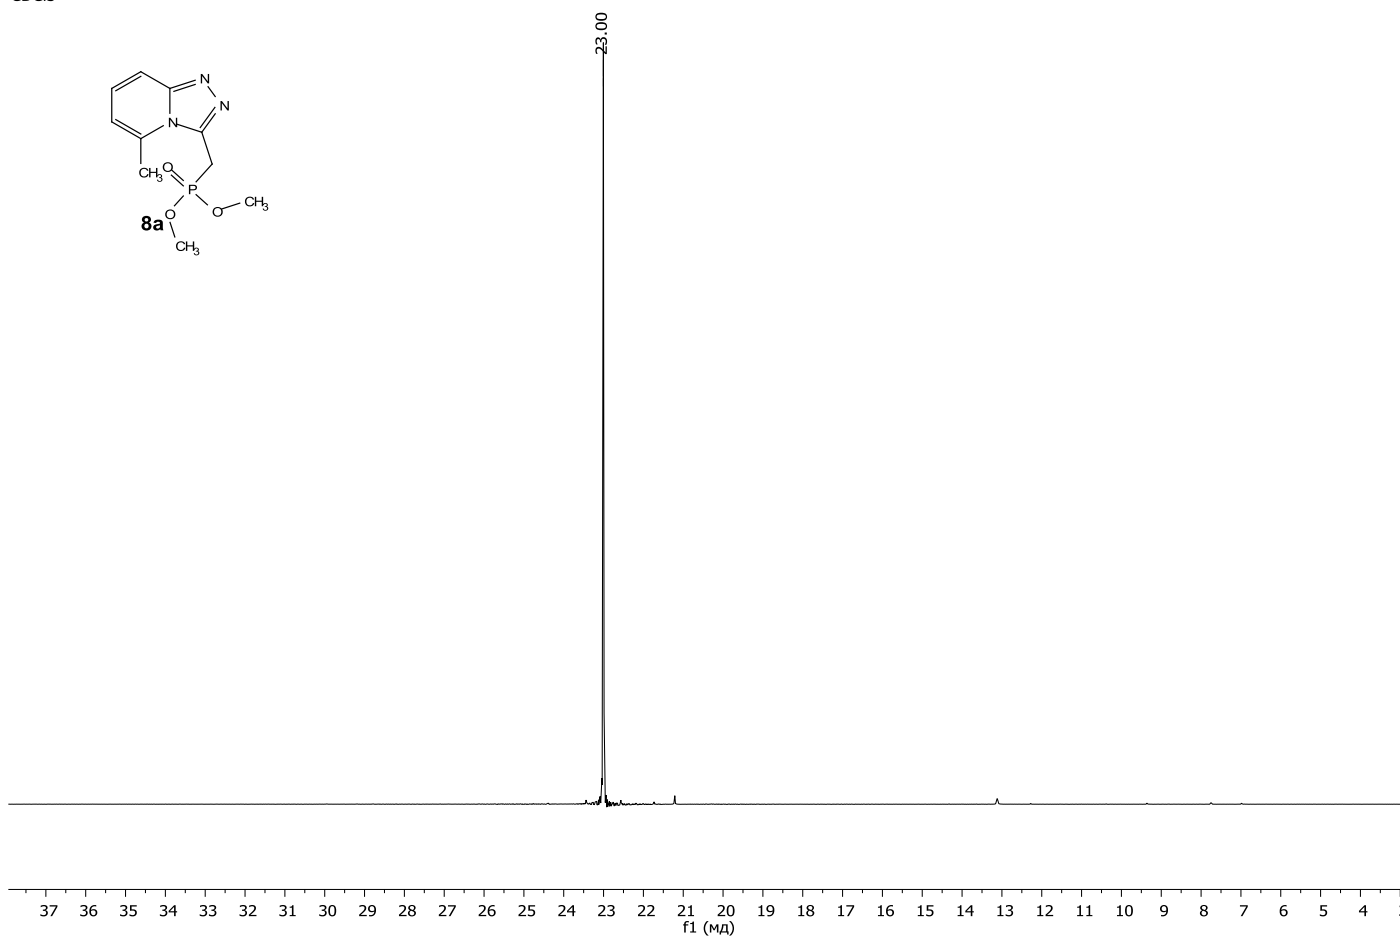

$^1\text{H}$ , 1D, 400.17 Hz  
 $\text{CDCl}_3$

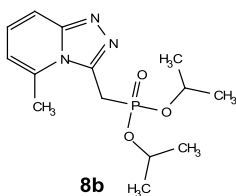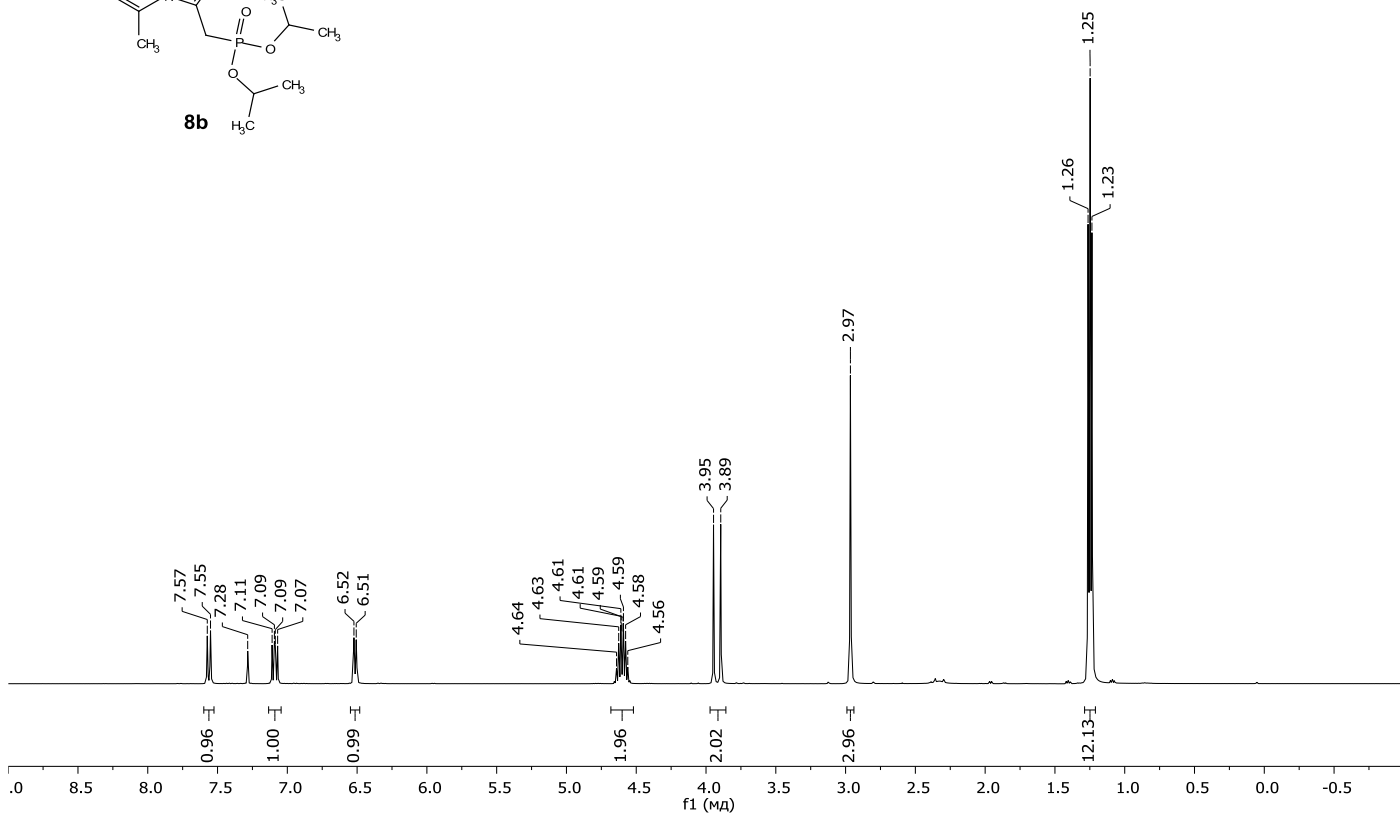

$^{13}\text{C}$ , 1D, 100.63 Hz  
 $\text{CDCl}_3$

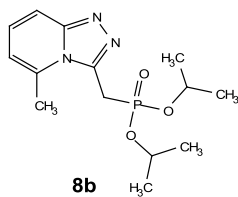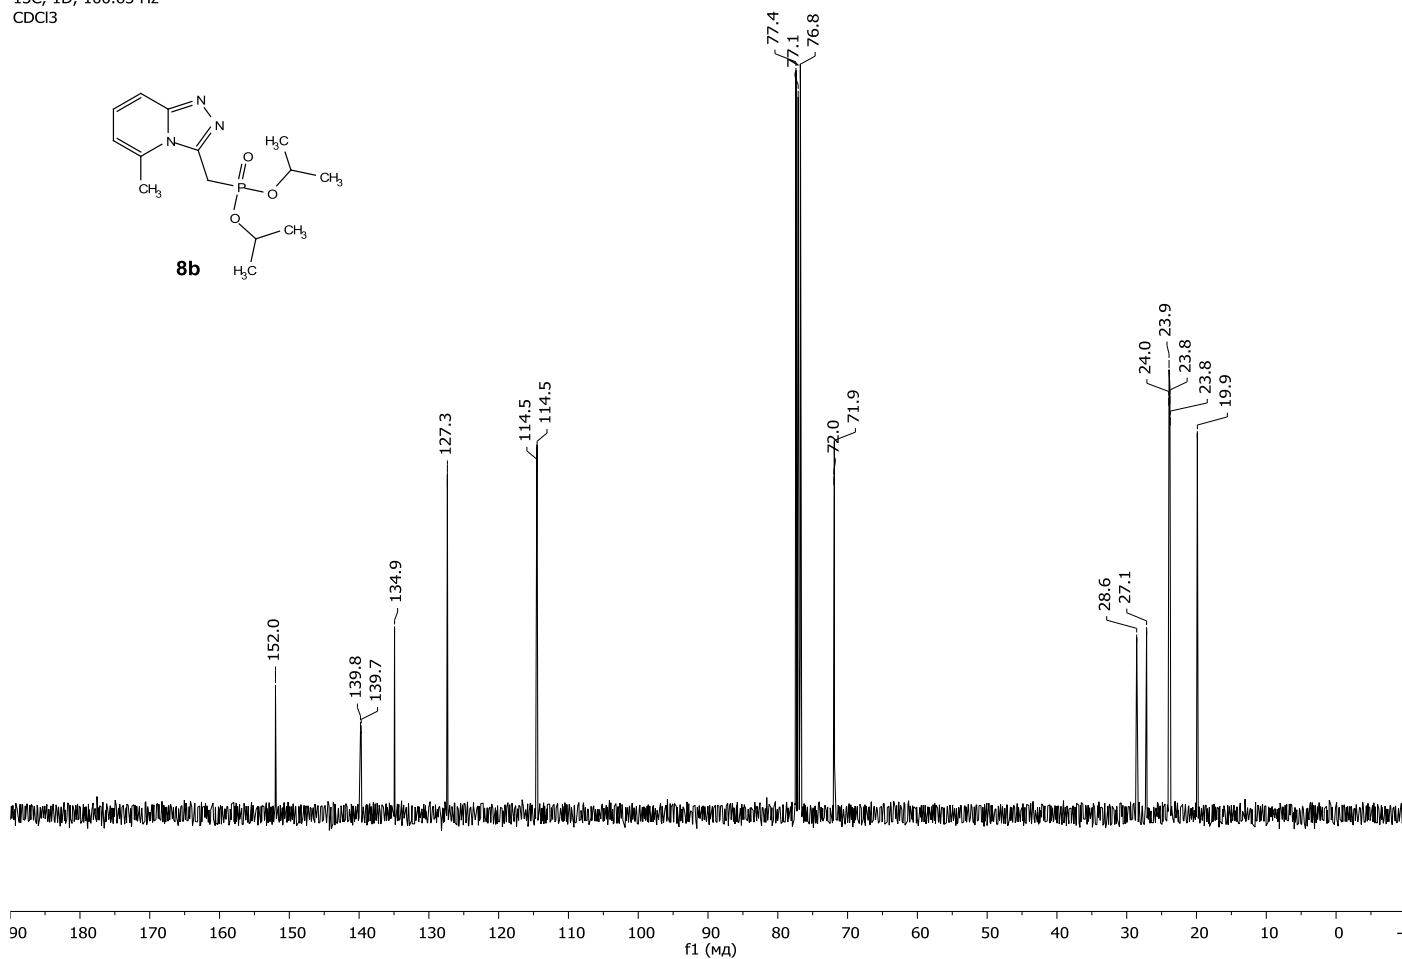

$^{31}\text{P}$ , 1D, 162.01 Hz  
 $\text{CDCl}_3$

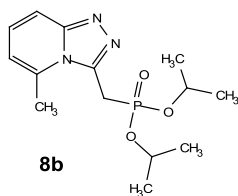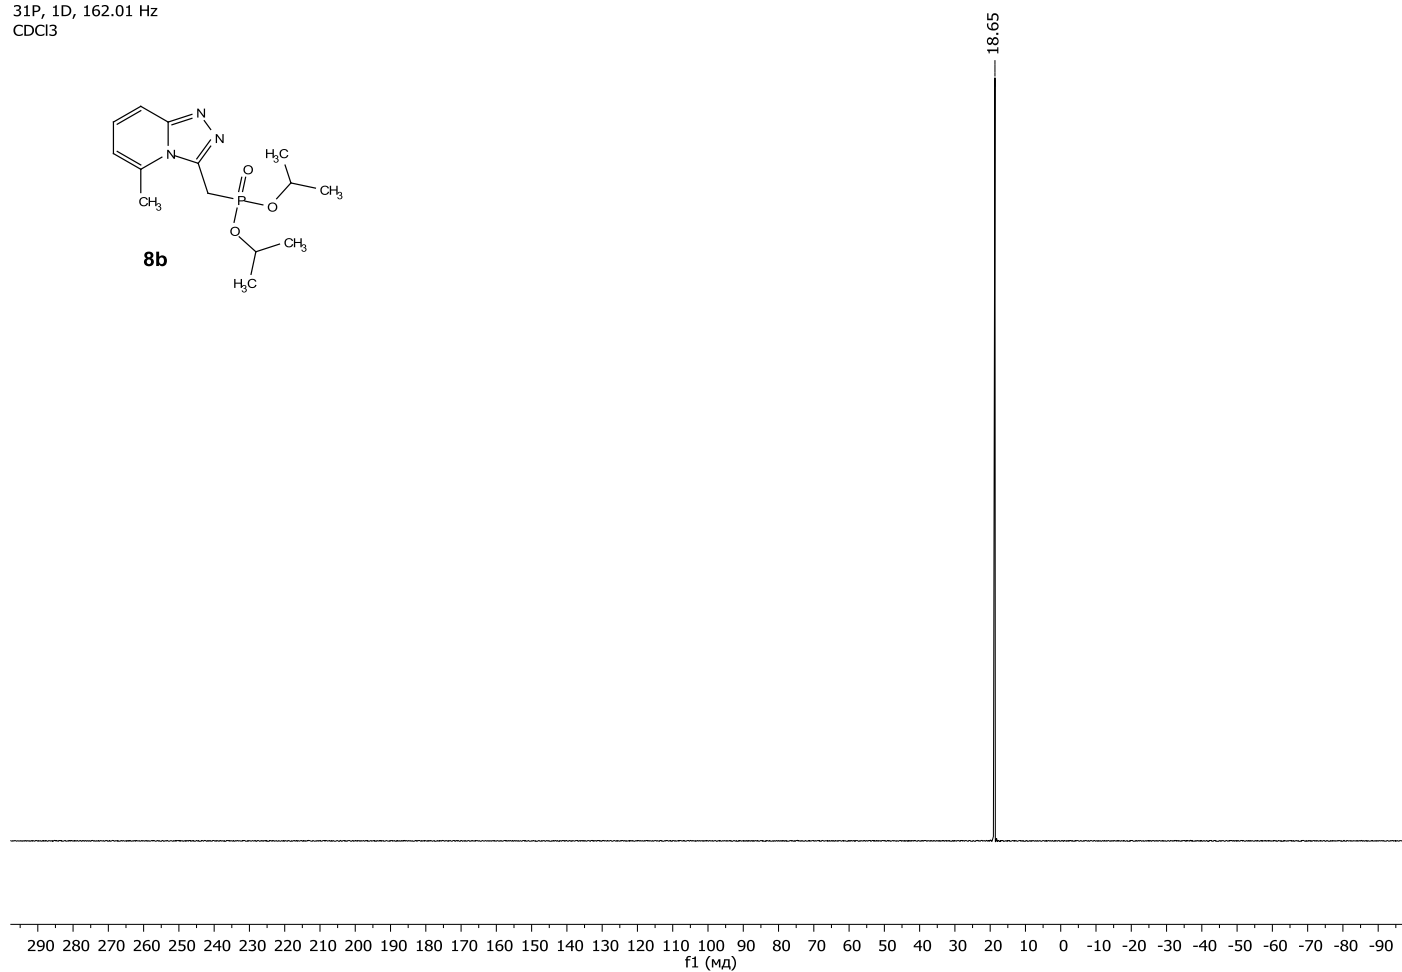

$^1\text{H}$ , 1D, 400.17 Hz  
 $\text{CDCl}_3$

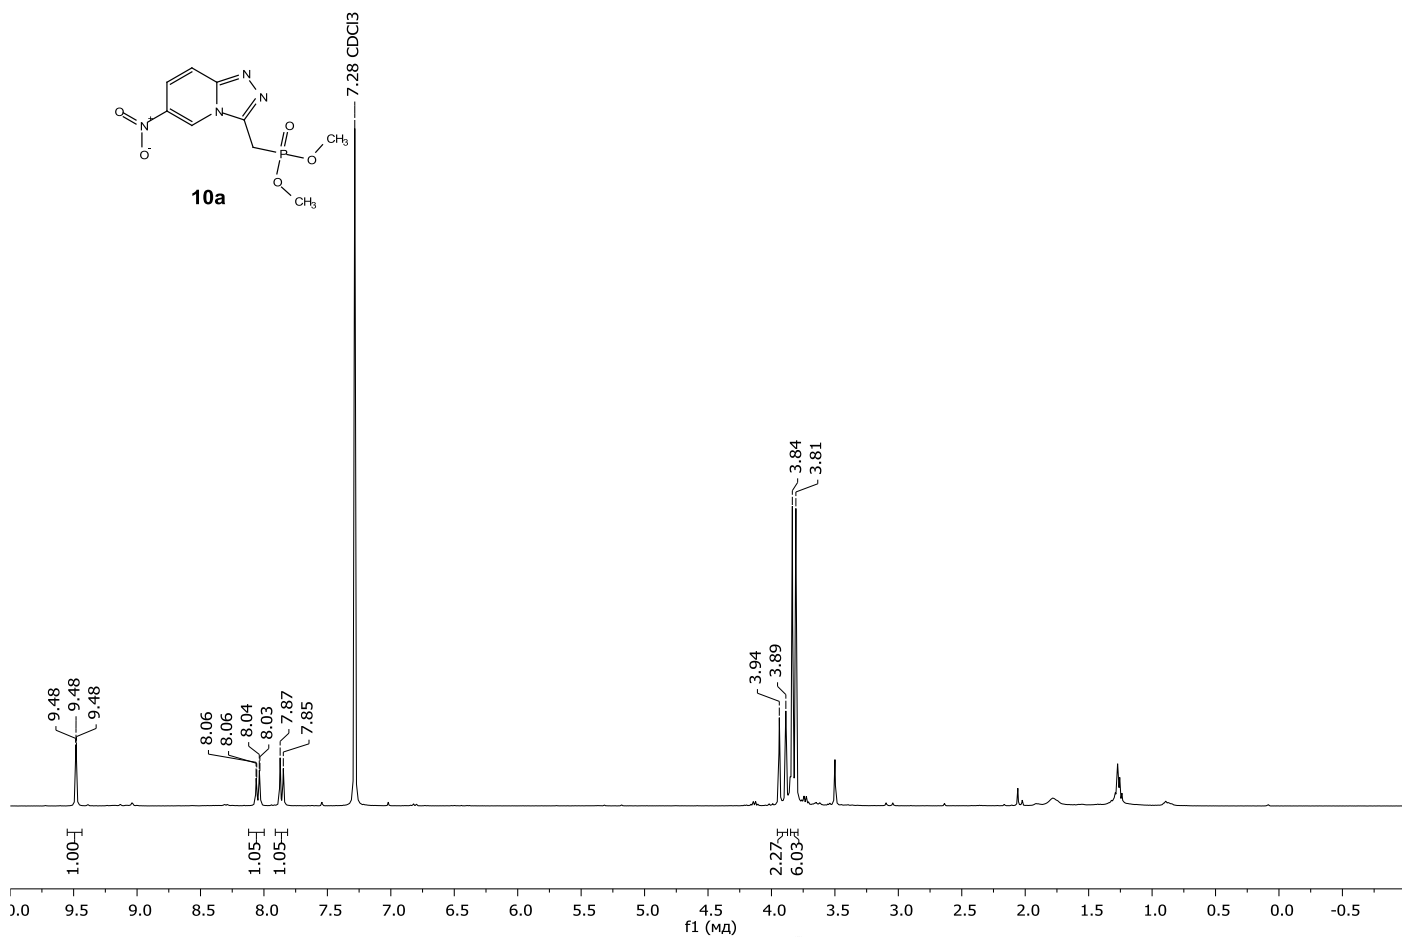

$^{13}\text{C}$ , 1D, 100.63 Hz  
 $\text{CDCl}_3$

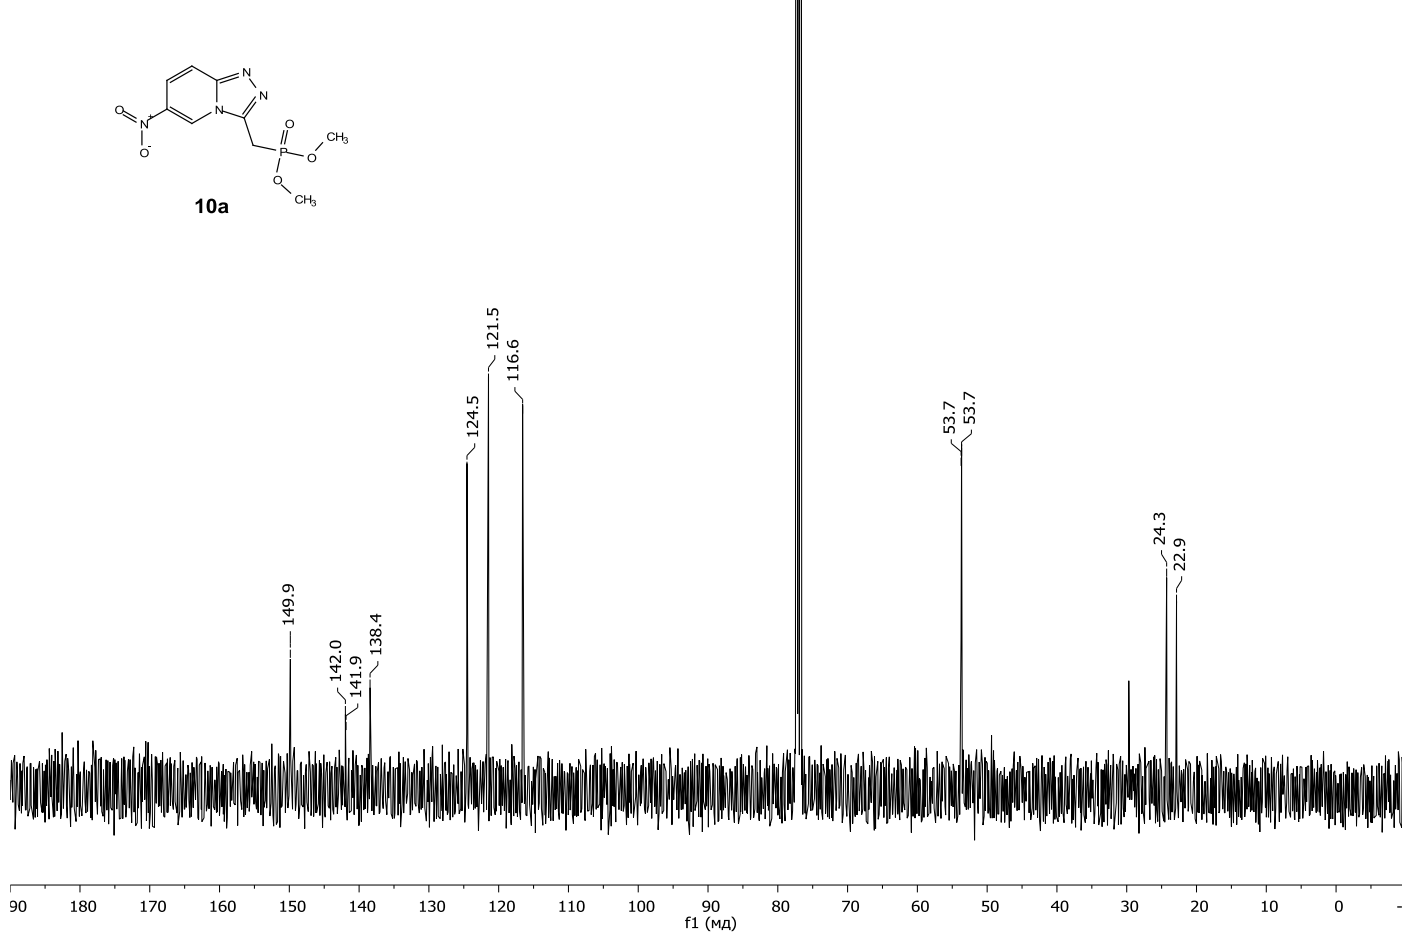

<sup>31</sup>P, 1D, 162.01 Hz  
CDCl<sub>3</sub>

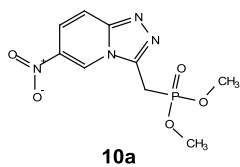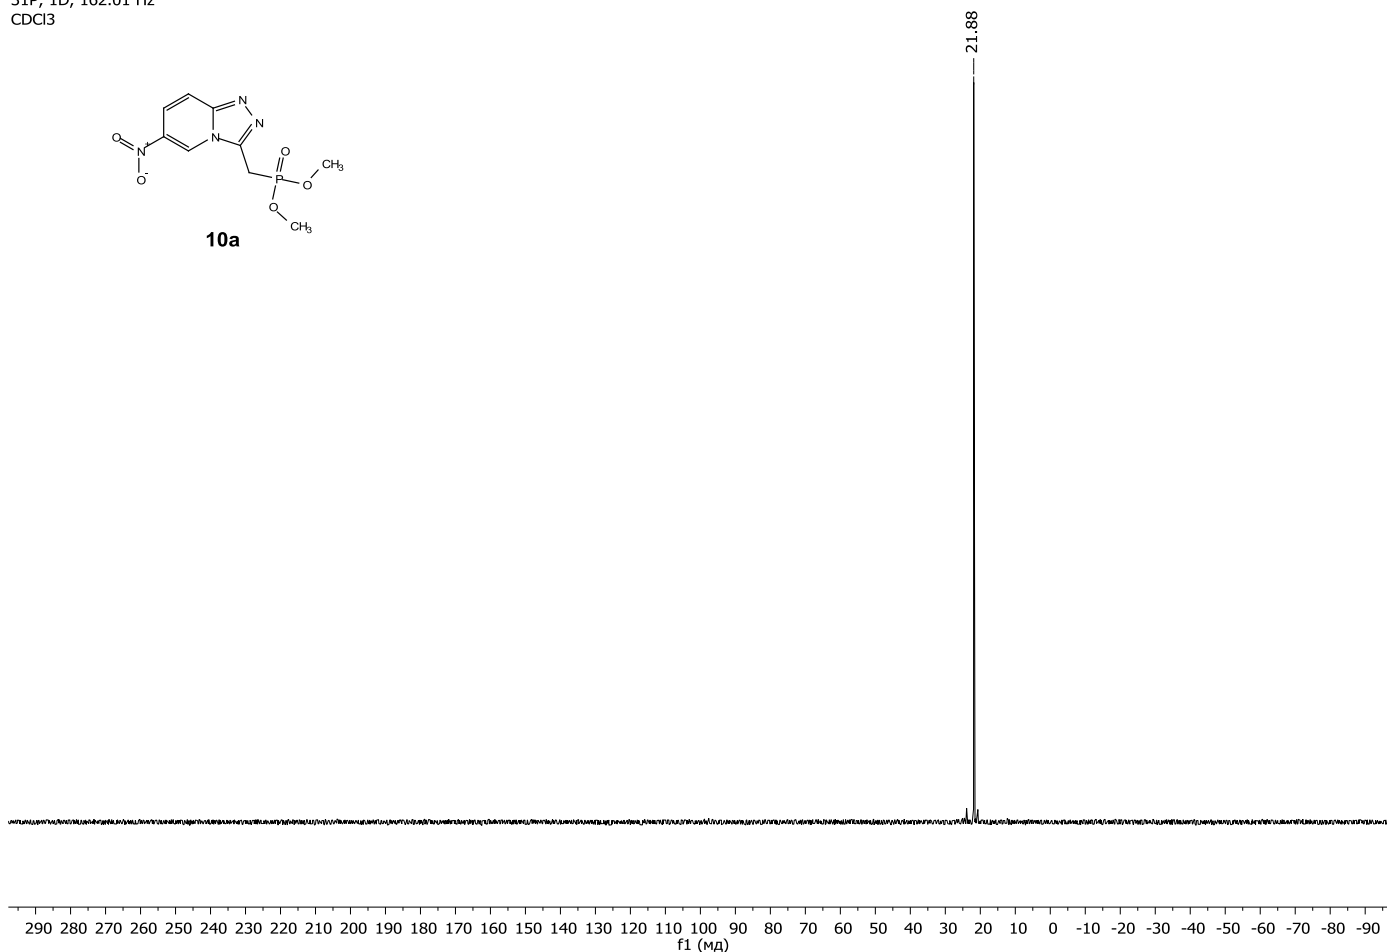

<sup>1</sup>H, 1D, 400.17 Hz  
CDCl<sub>3</sub>

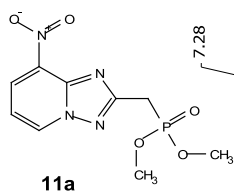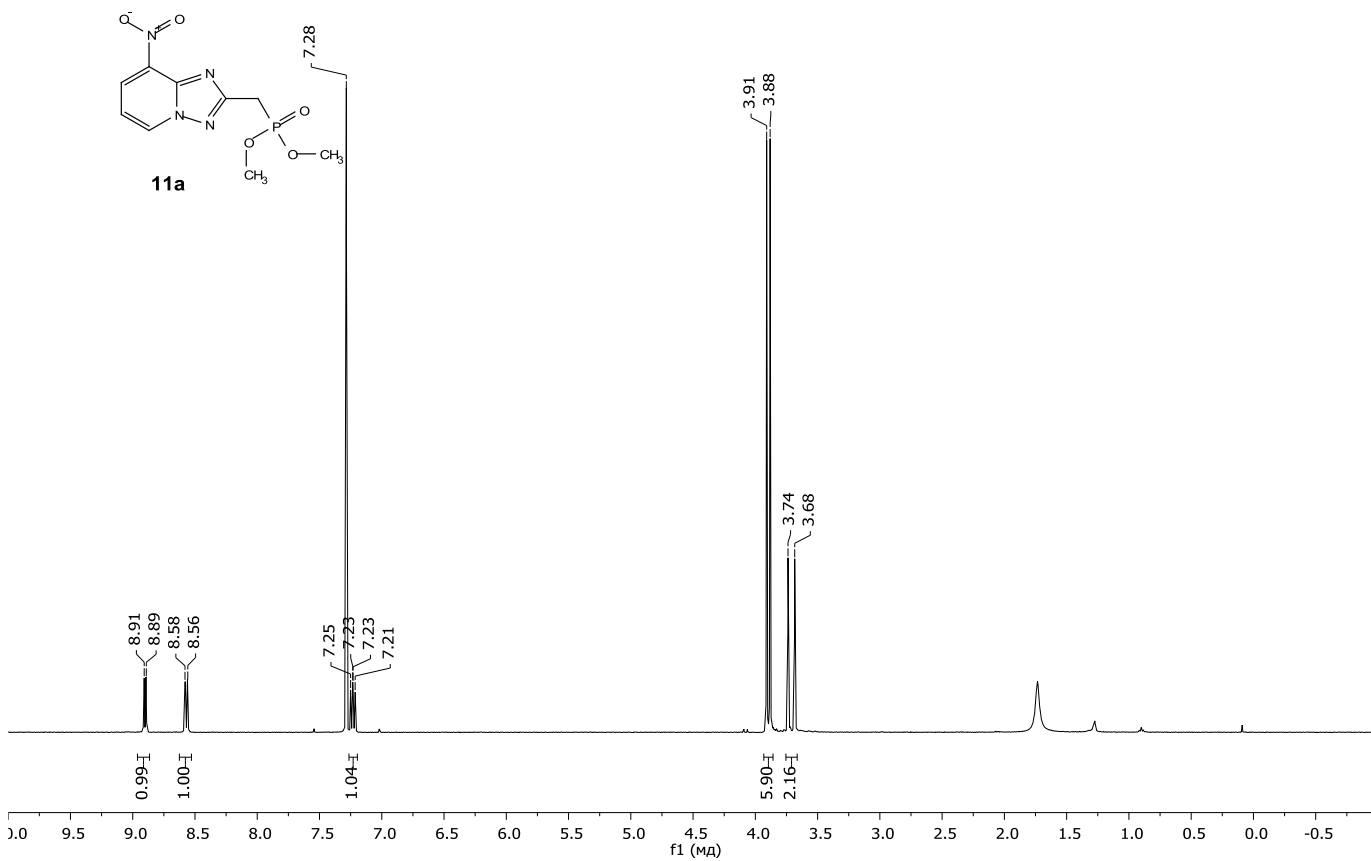

$^{13}\text{C}$ , 1D, 100.63 Hz  
 $\text{CDCl}_3$

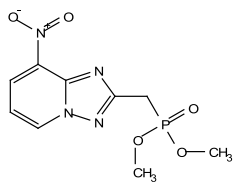

**11a**

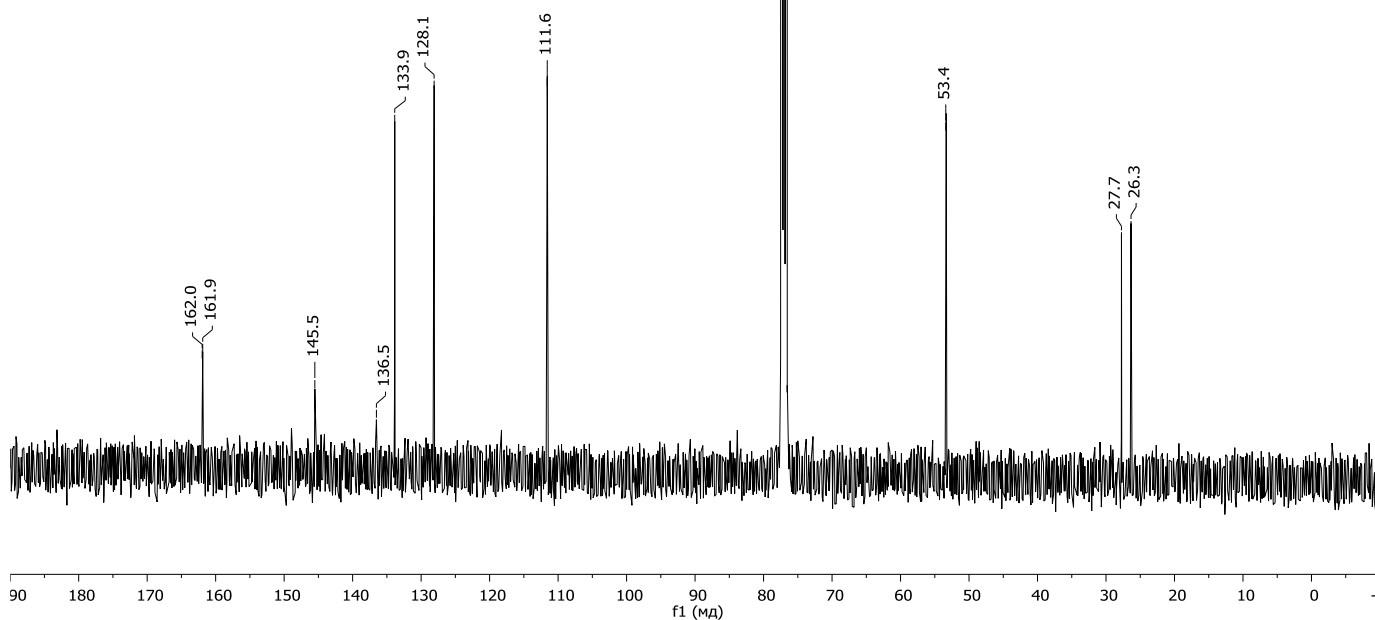

$^{31}\text{P}$ , 1D, 162.01 Hz  
 $\text{CDCl}_3$

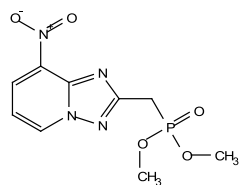

**11a**

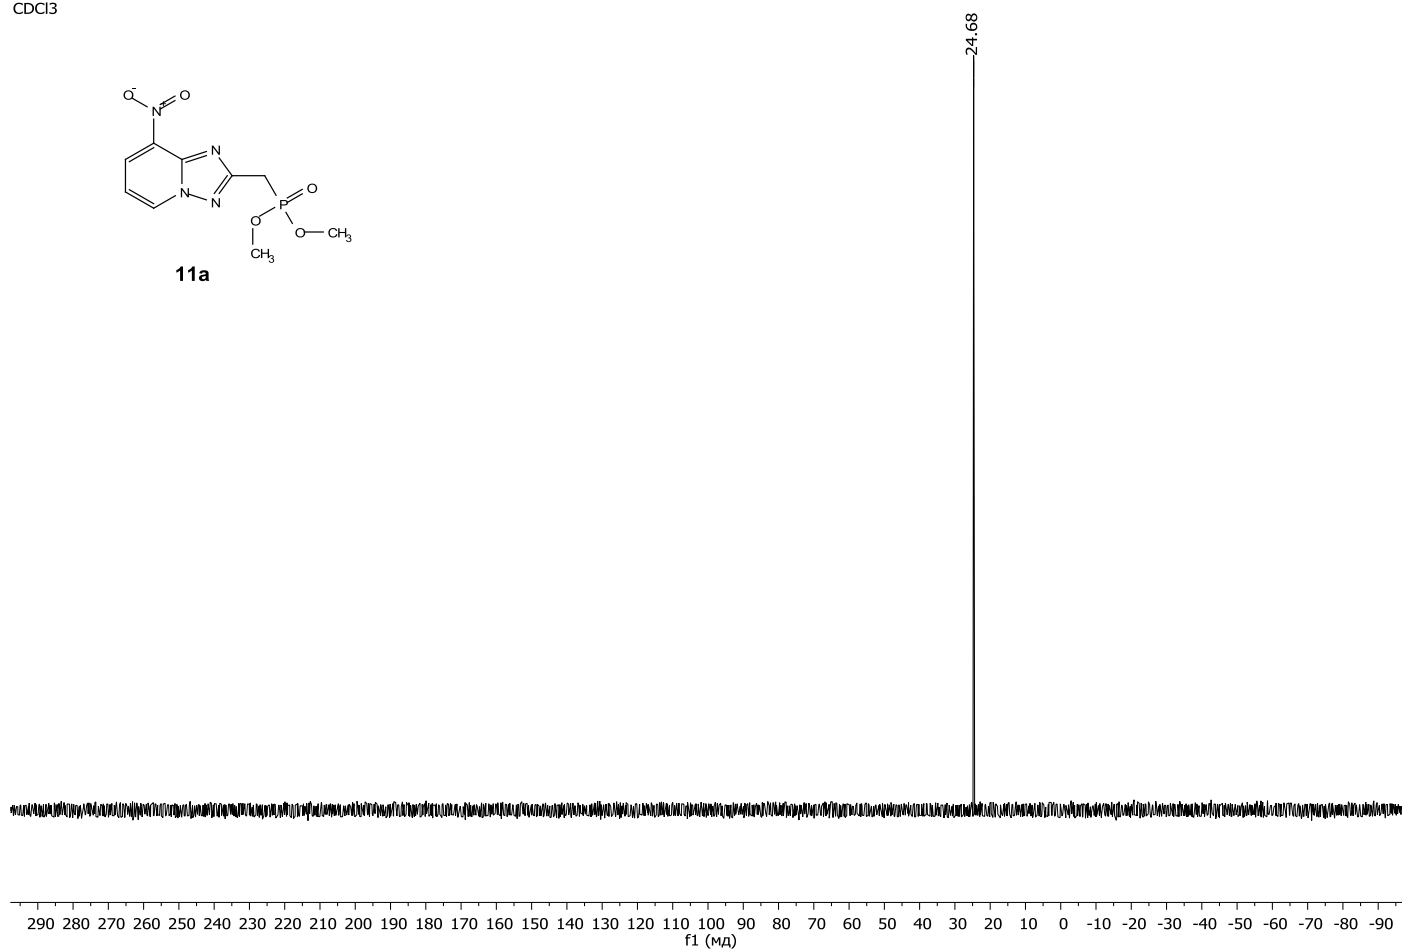

$^1\text{H}$ , 1D, 400.17 Hz  
 $\text{CDCl}_3$

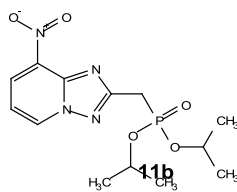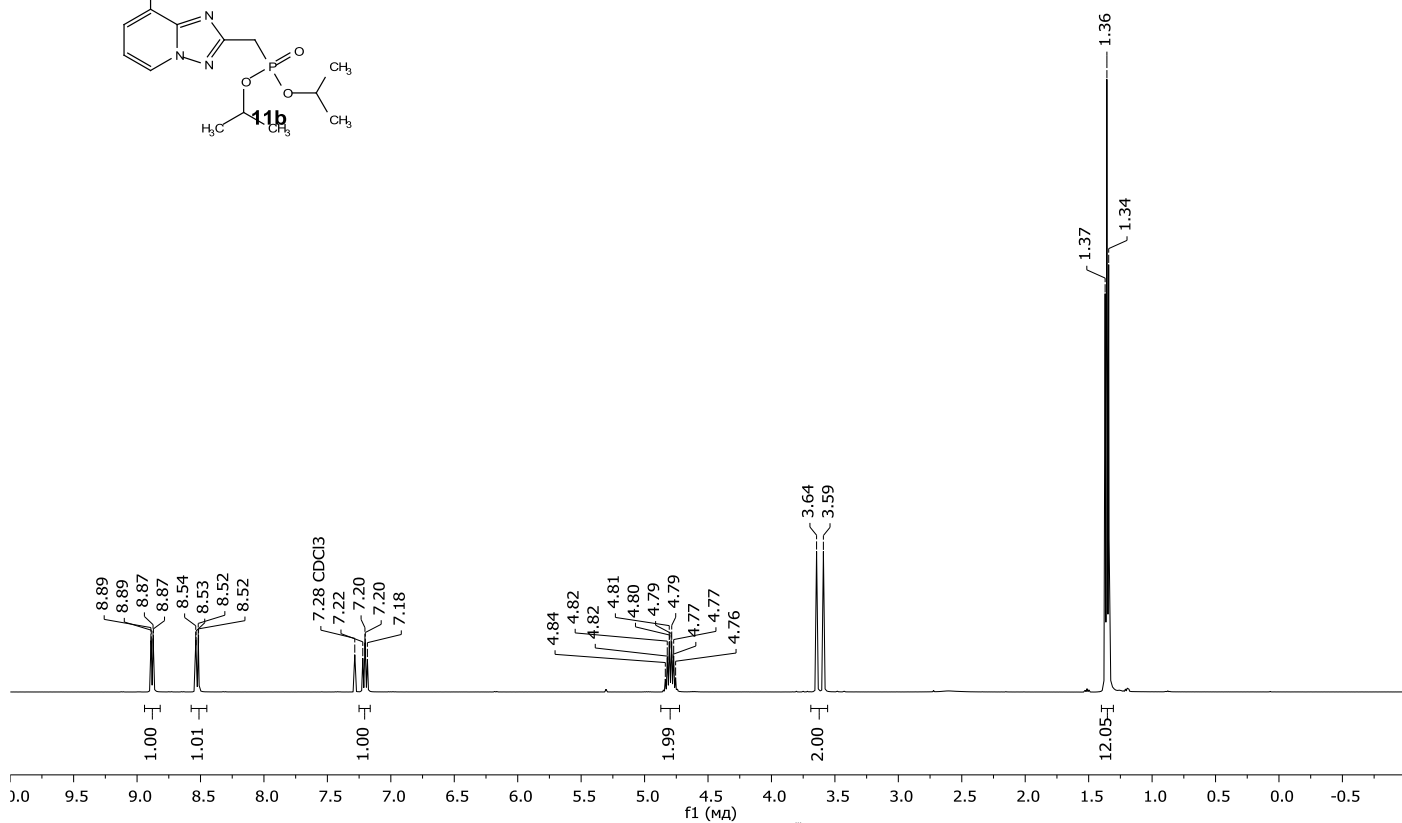

$^{13}\text{C}$ , 1D, 100.63 Hz  
 $\text{CDCl}_3$

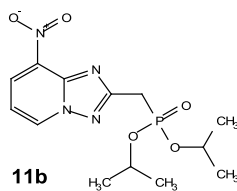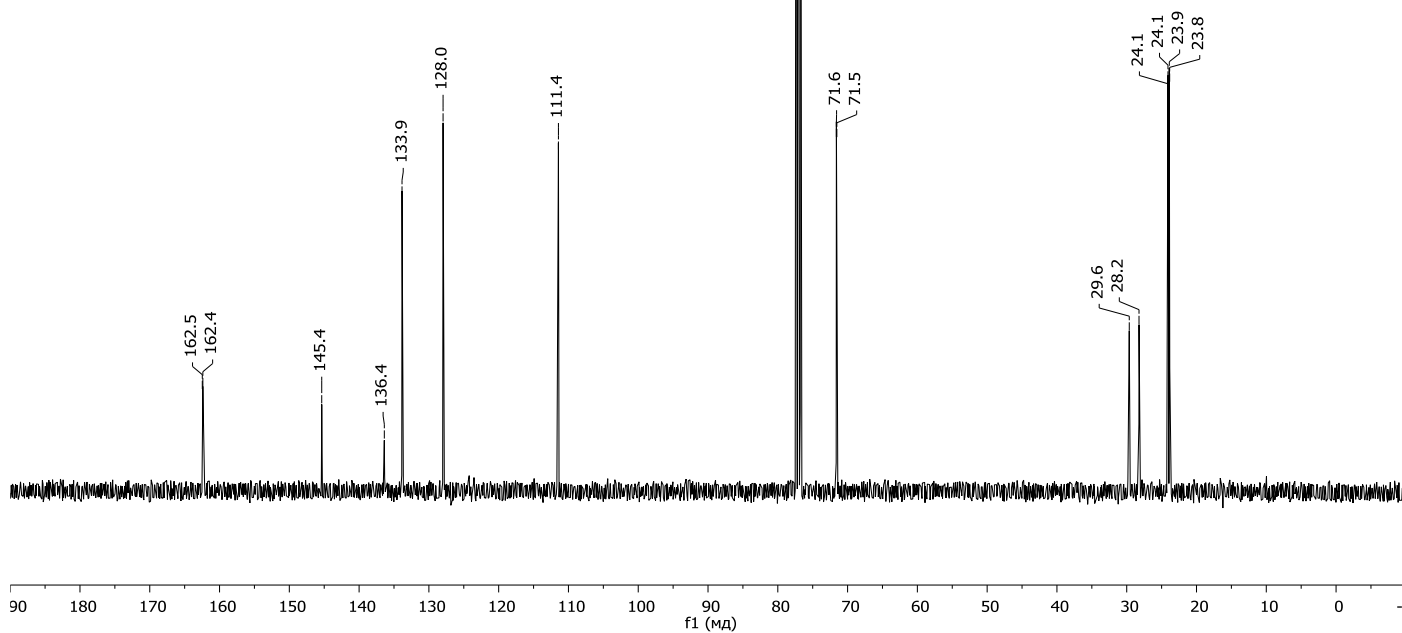

<sup>31</sup>P, 1D, 162.01 Hz  
CDCl<sub>3</sub>

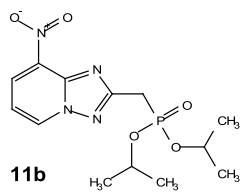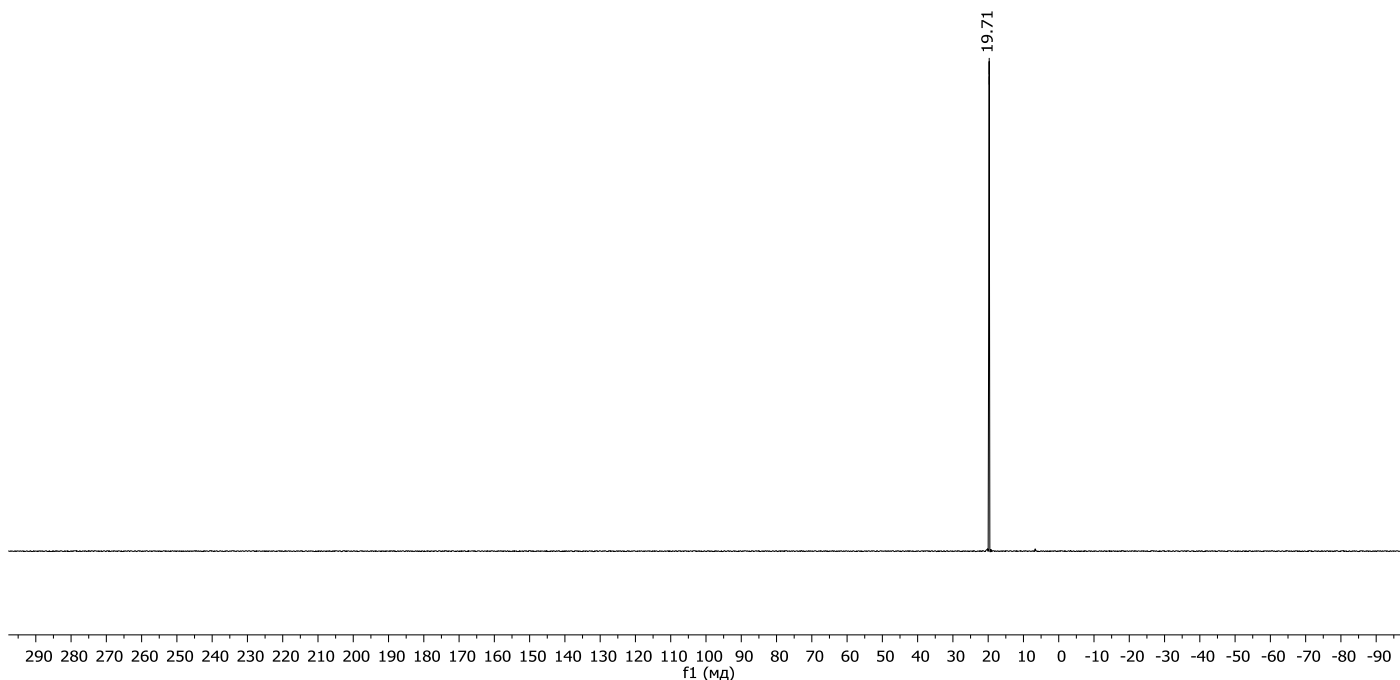

<sup>1</sup>H, 1D, 400.17 Hz  
CDCl<sub>3</sub>

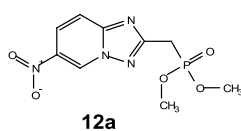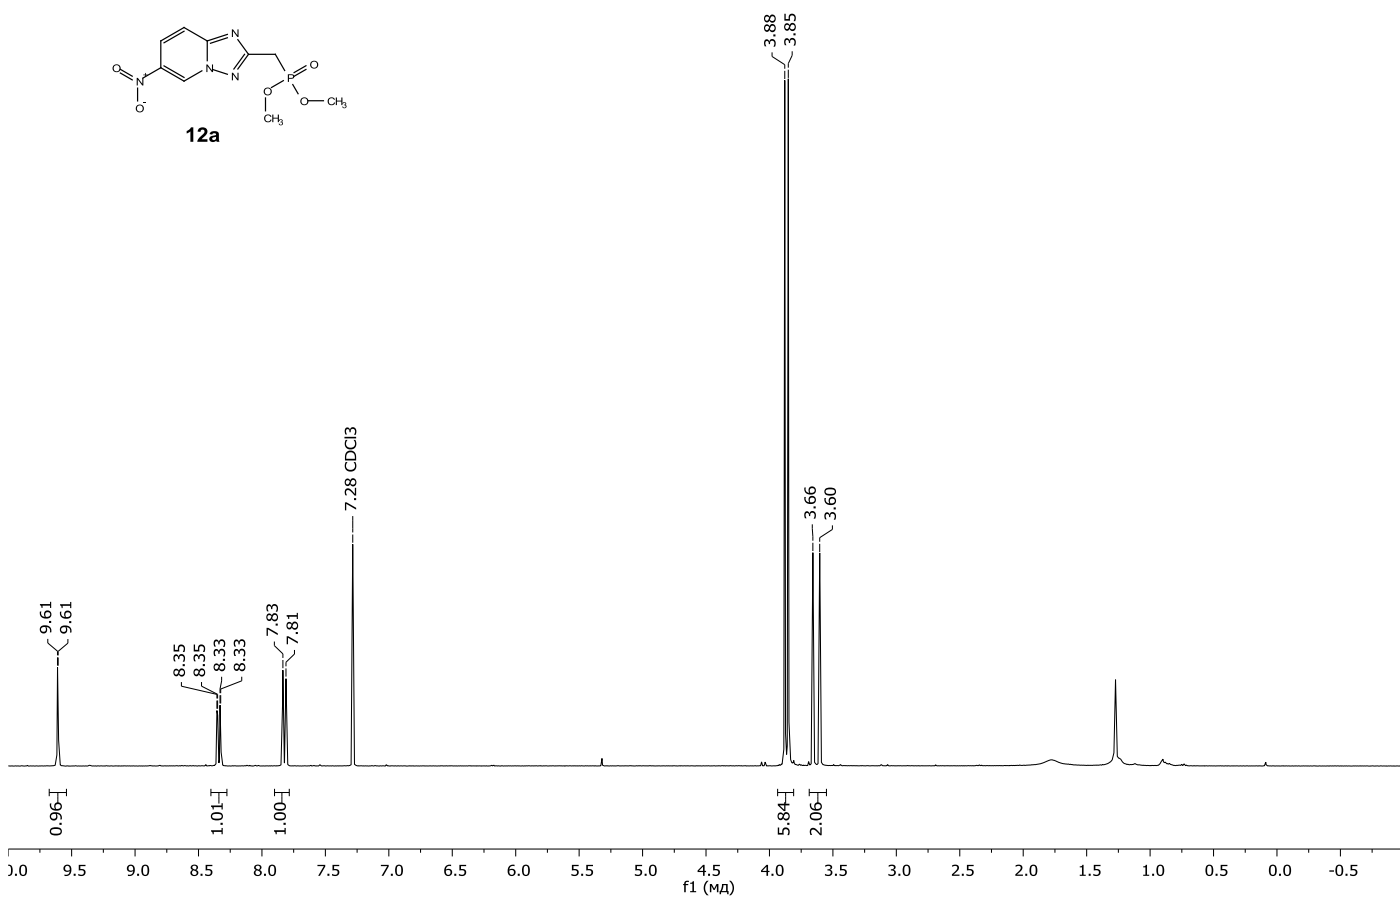

$^{13}\text{C}$ , 1D, 100.63 Hz  
 $\text{CDCl}_3$

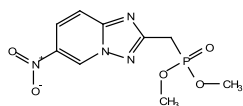**12a**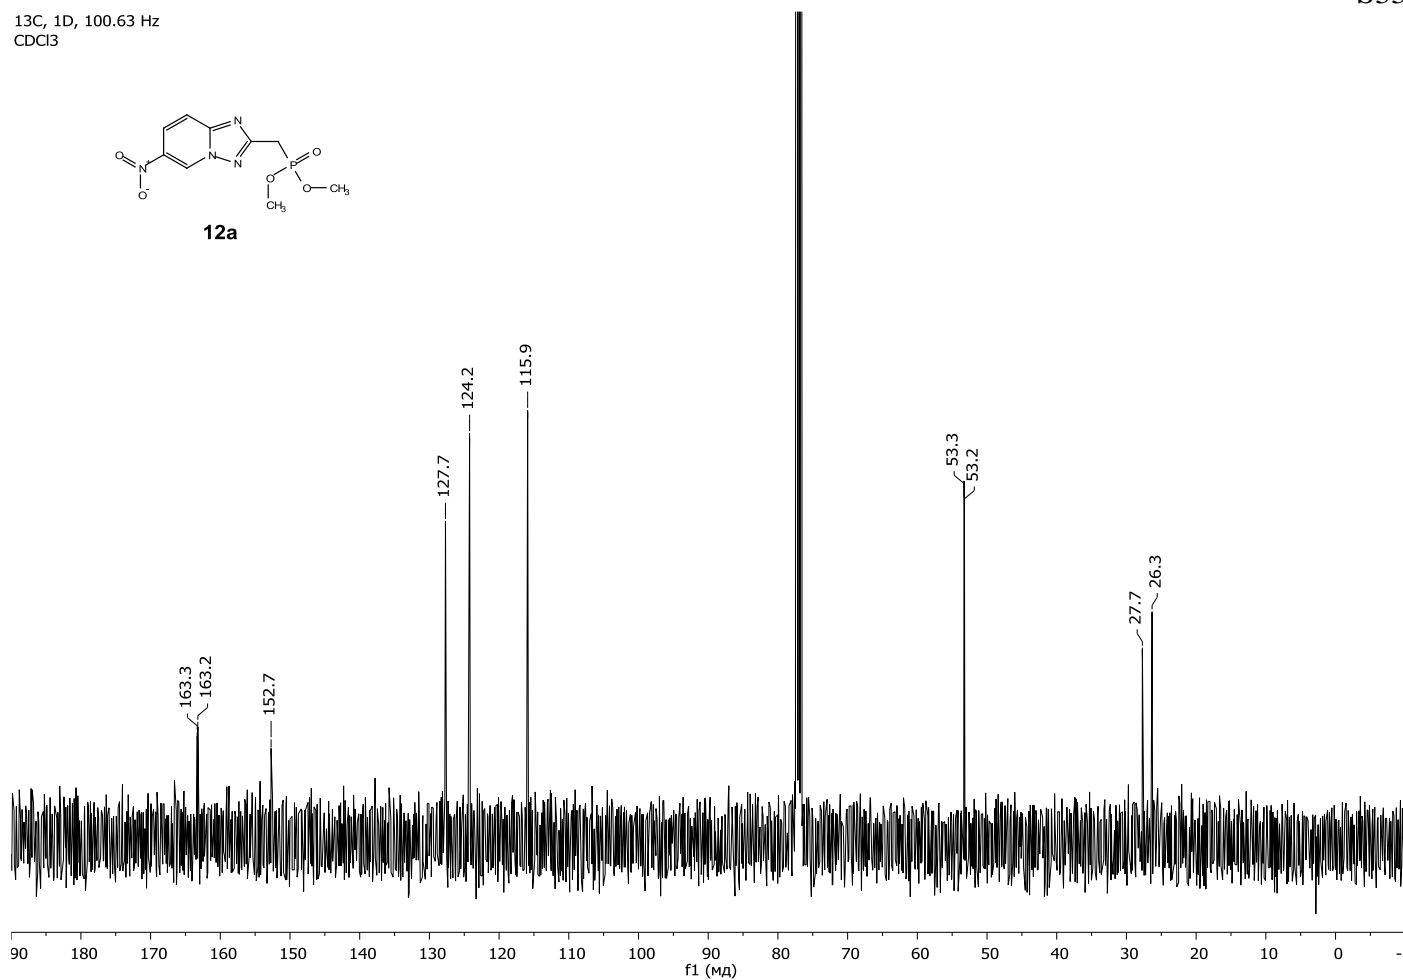

$^{31}\text{P}$ , 1D, 162.01 Hz  
 $\text{CDCl}_3$

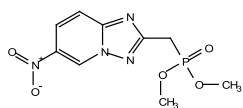**12a**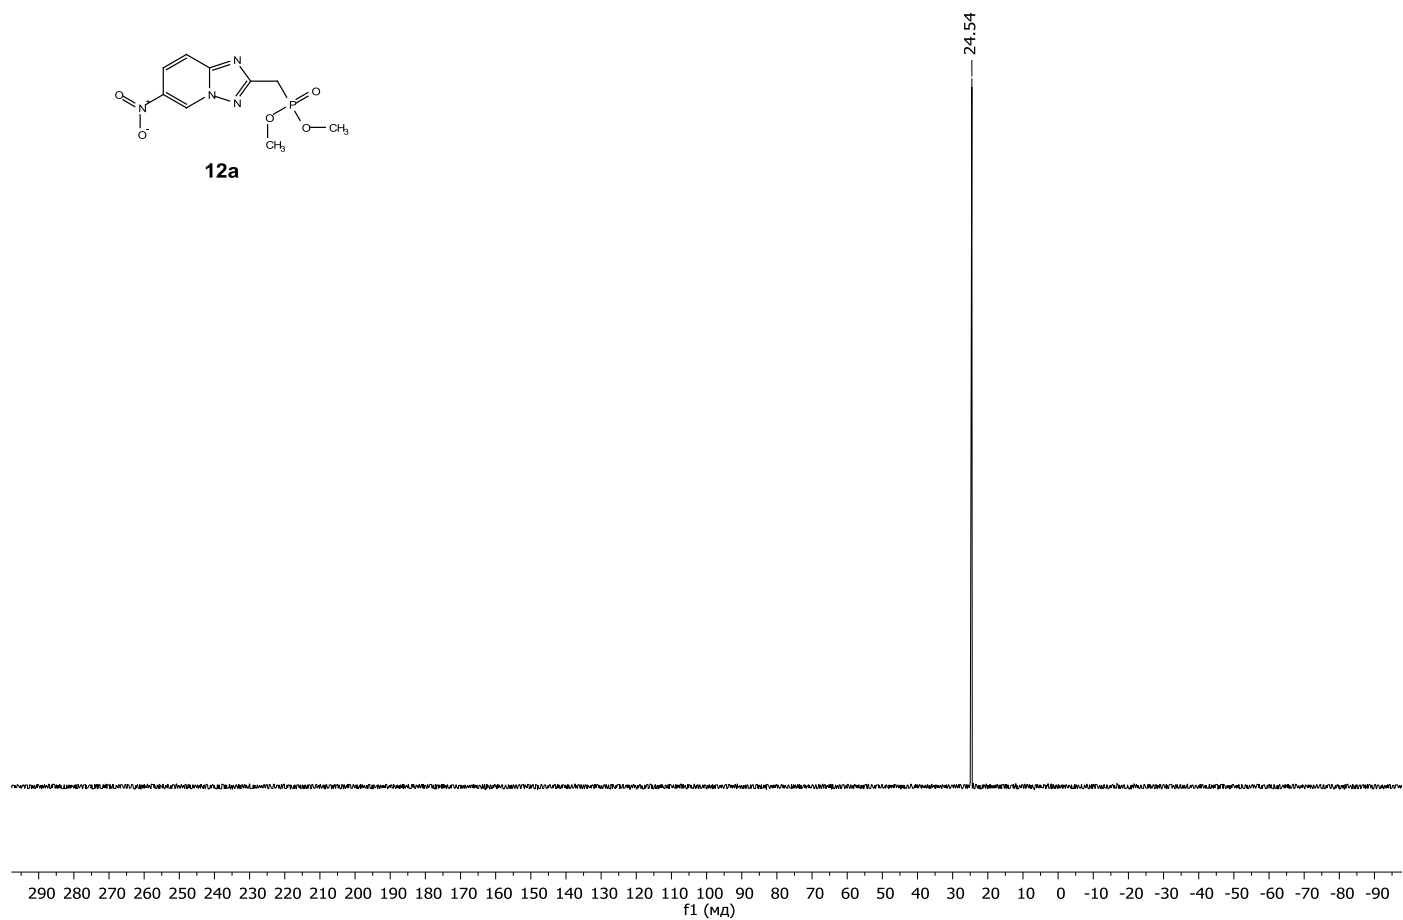

$^1\text{H}$ , 1D, 400.17 Hz  
 $\text{CDCl}_3$

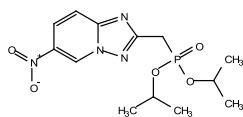**12b**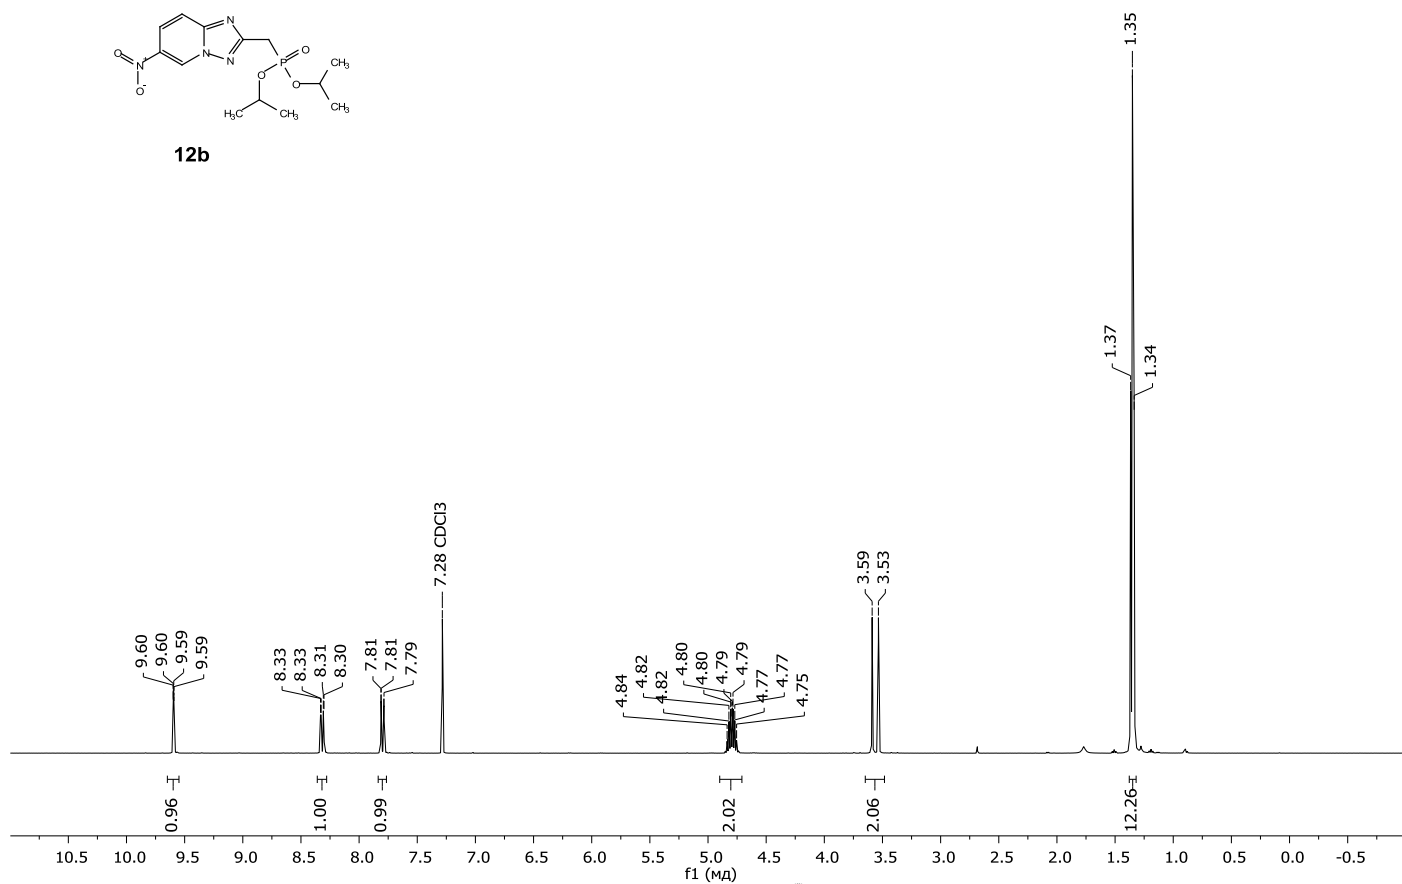

$^{13}\text{C}$ , 1D, 100.63 Hz  
 $\text{CDCl}_3$

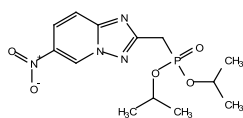**12b**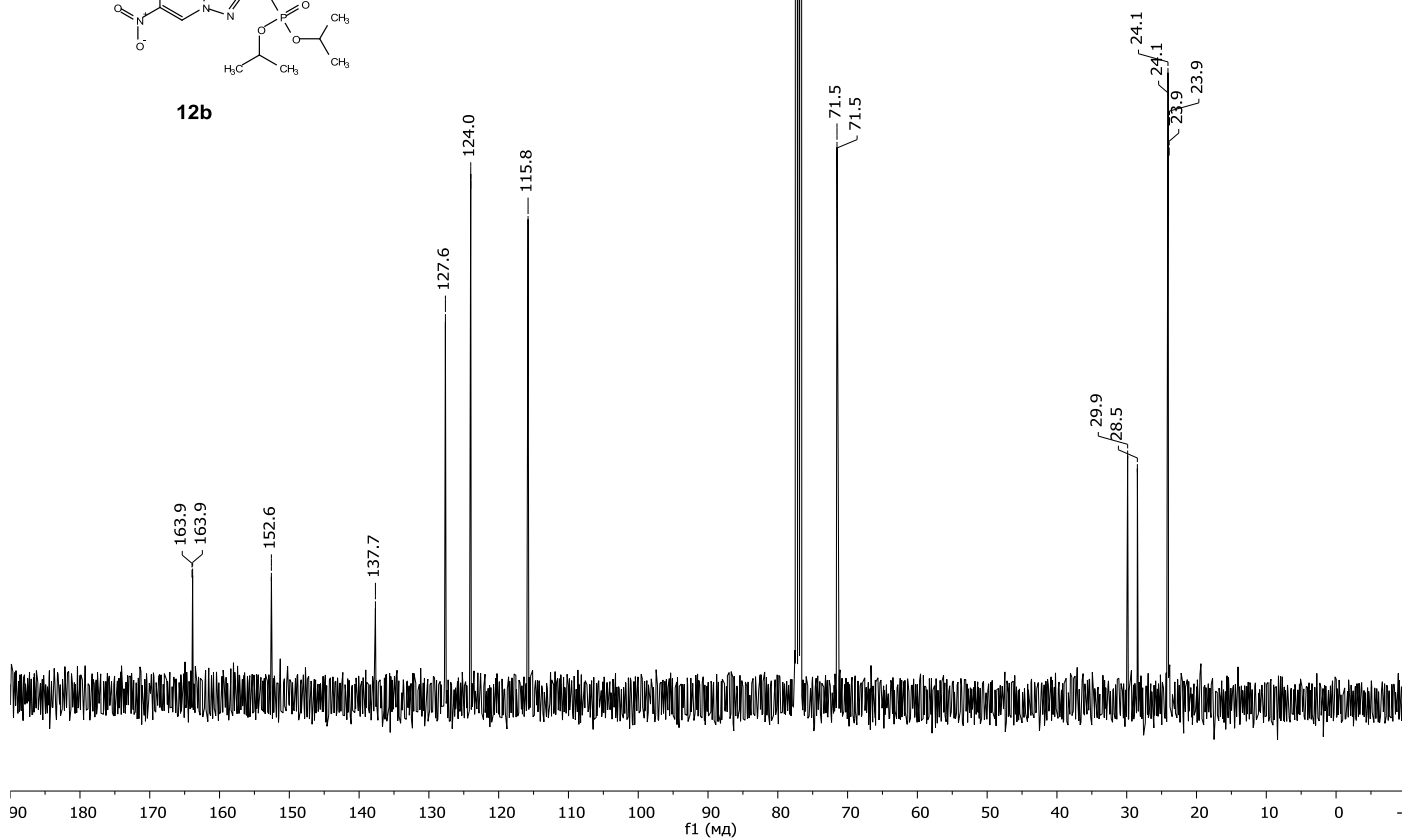

$^{31}\text{P}$ , 1D, 162.01 Hz  
 $\text{CDCl}_3$

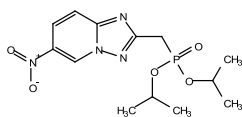**12b**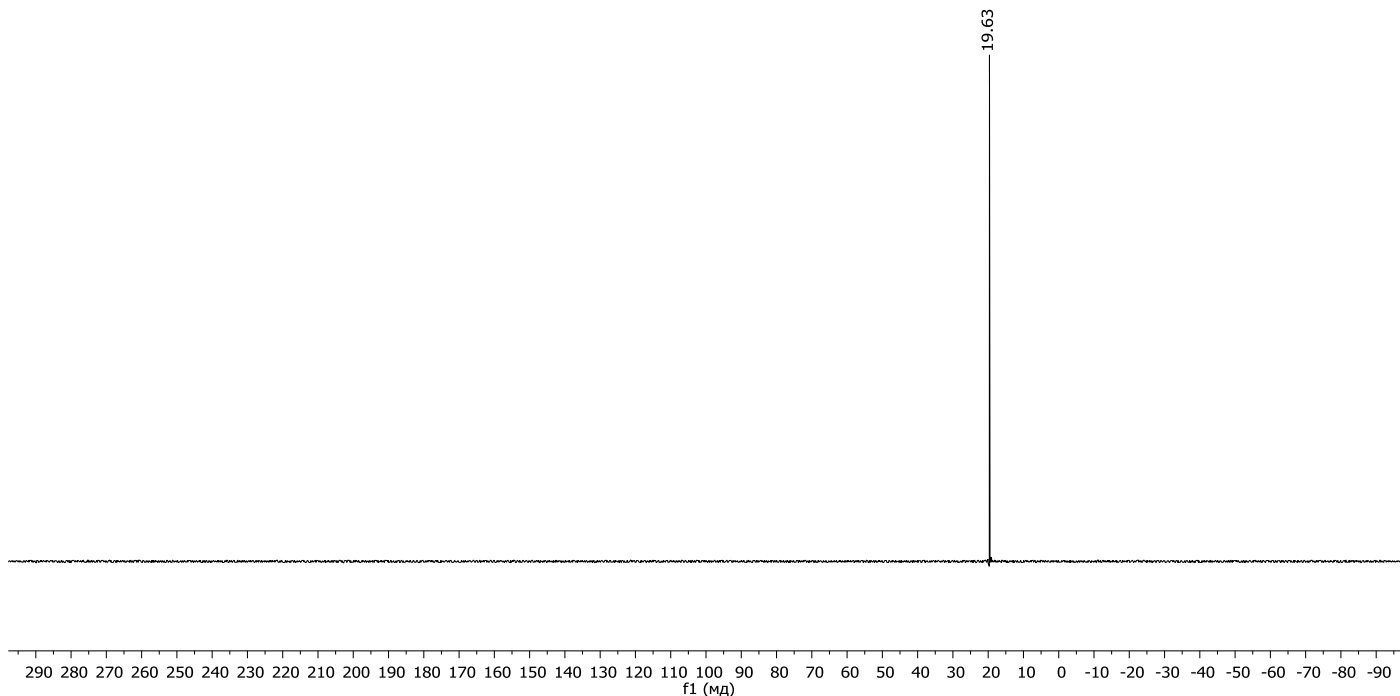

$^1\text{H}$ , 1D, 400.17 Hz  
 $\text{CDCl}_3$

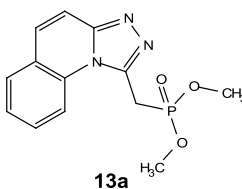**13a**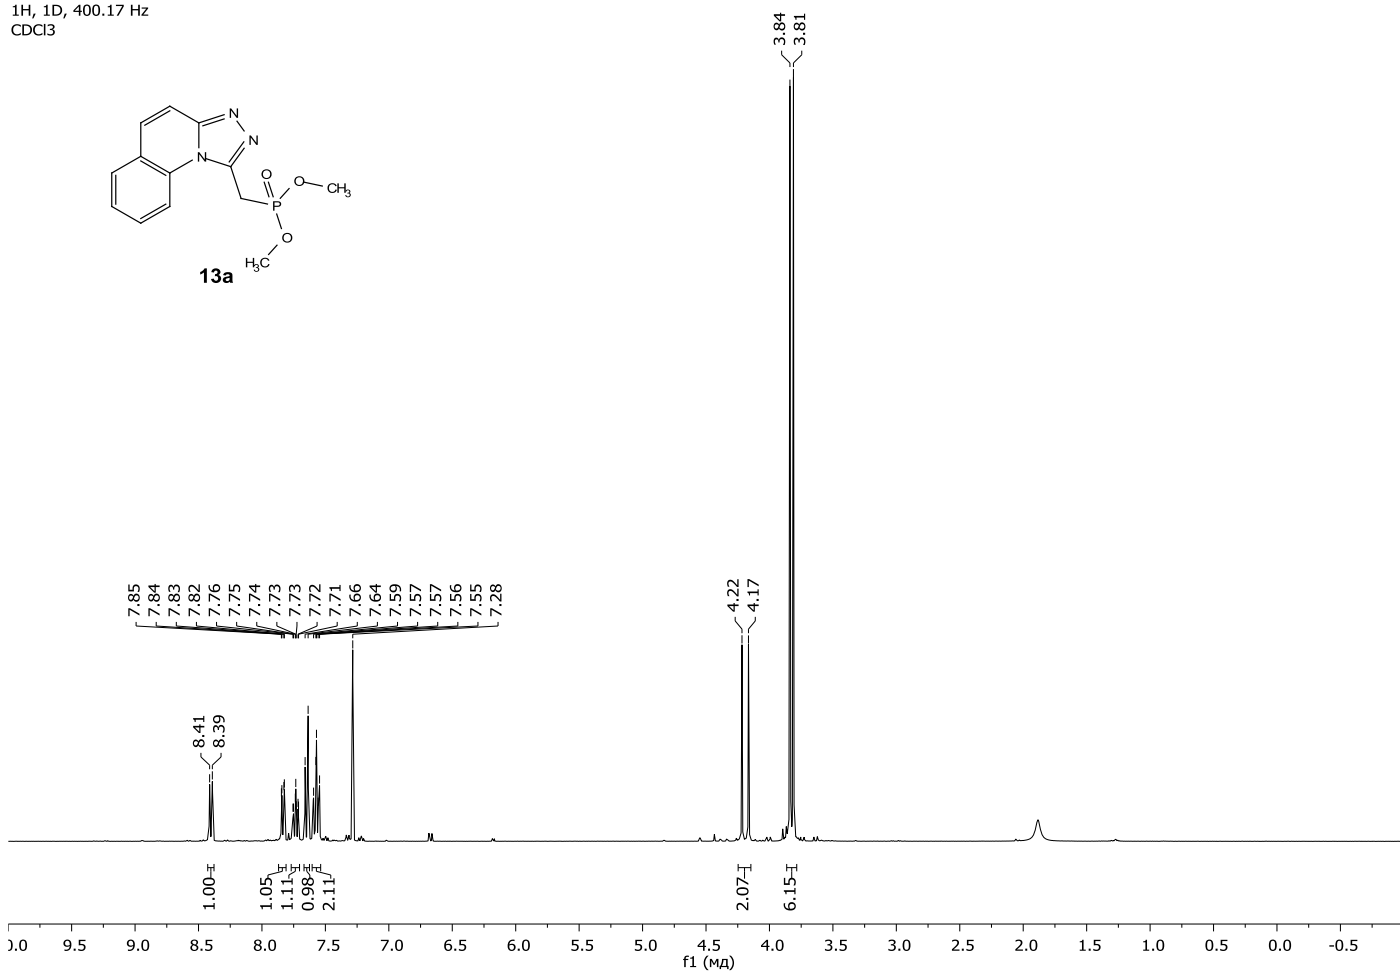

$^{13}\text{C}$ , 1D, 100.63 Hz  
 $\text{CDCl}_3$

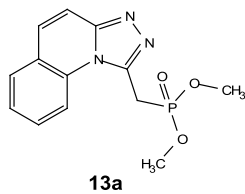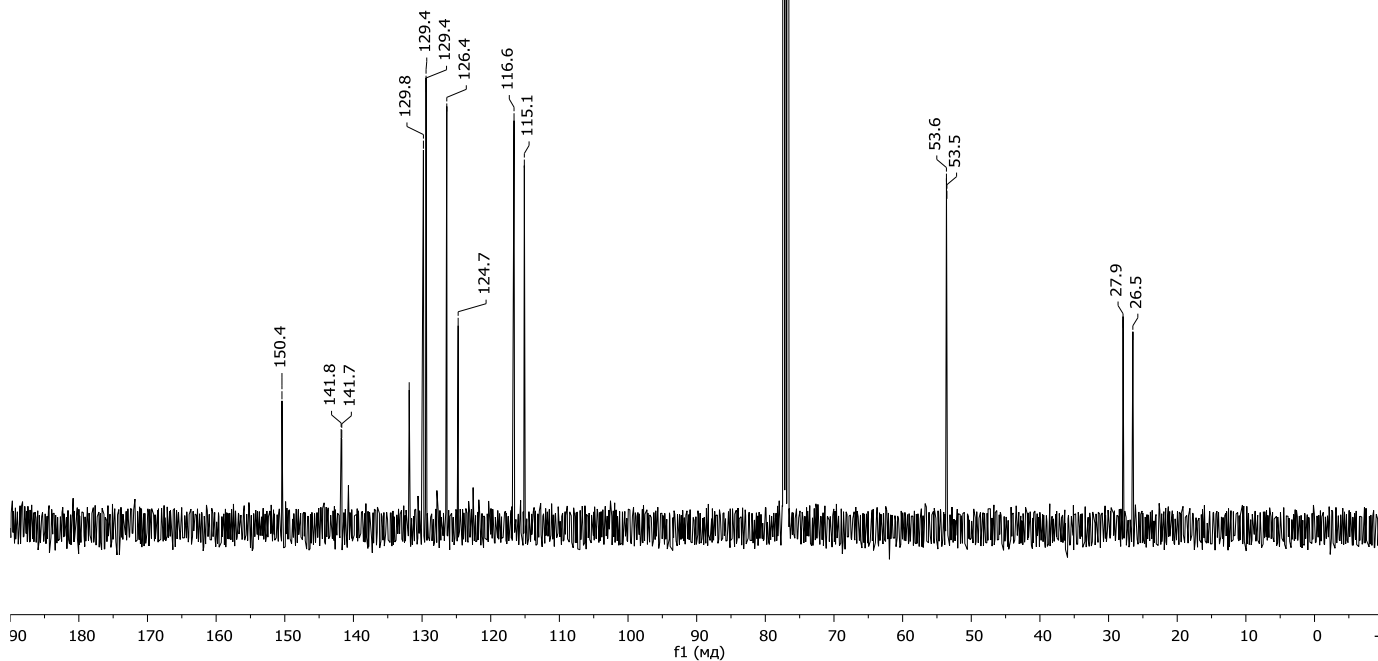

$^{31}\text{P}$ , 1D, 162.01 Hz  
 $\text{CDCl}_3$

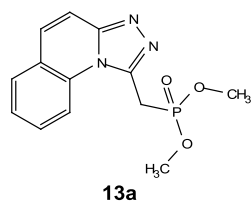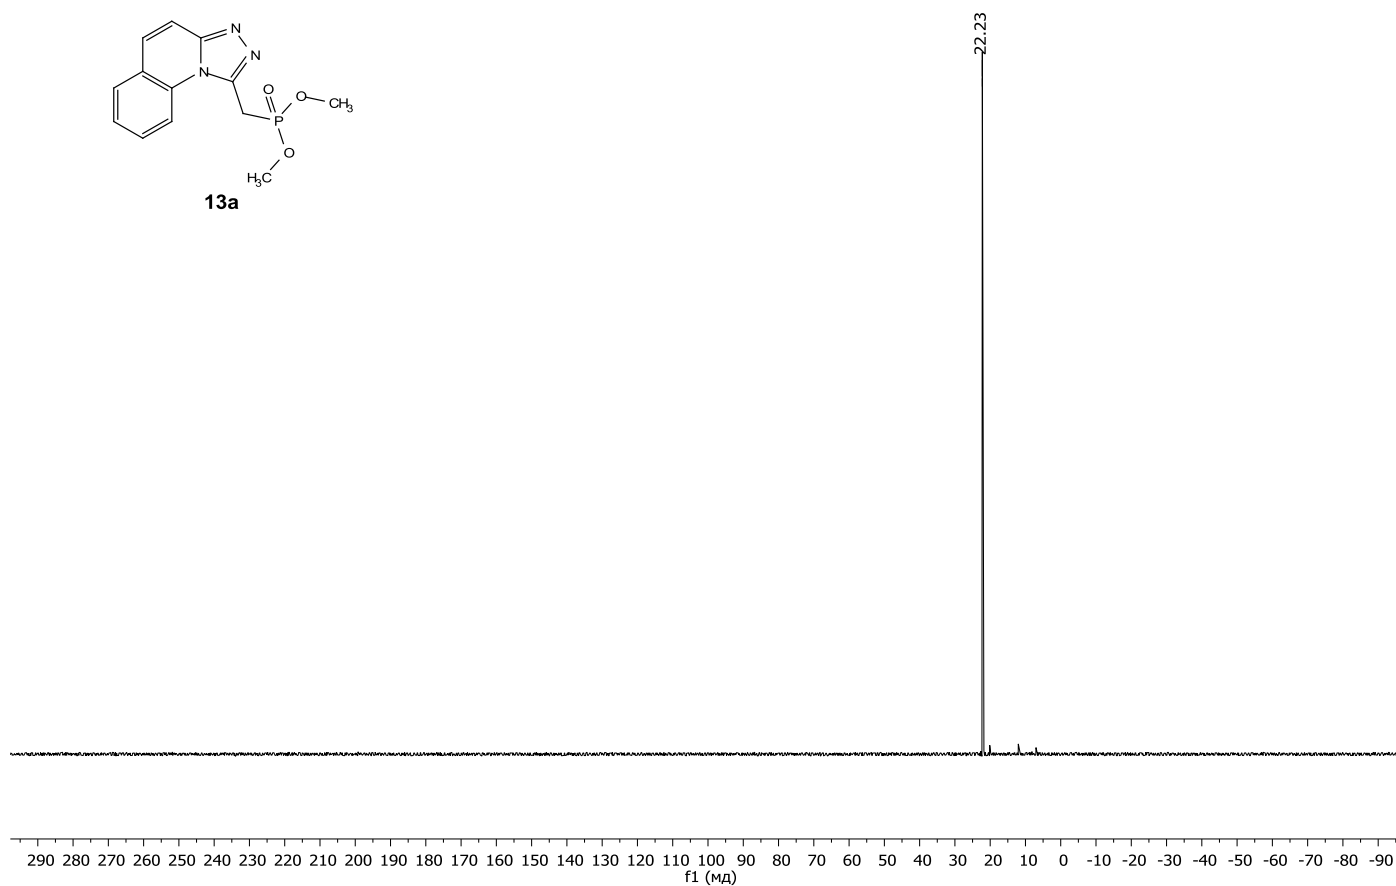

$^1\text{H}$ , 1D, 400.17 Hz  
 $\text{CDCl}_3$

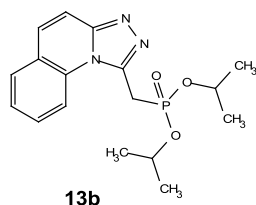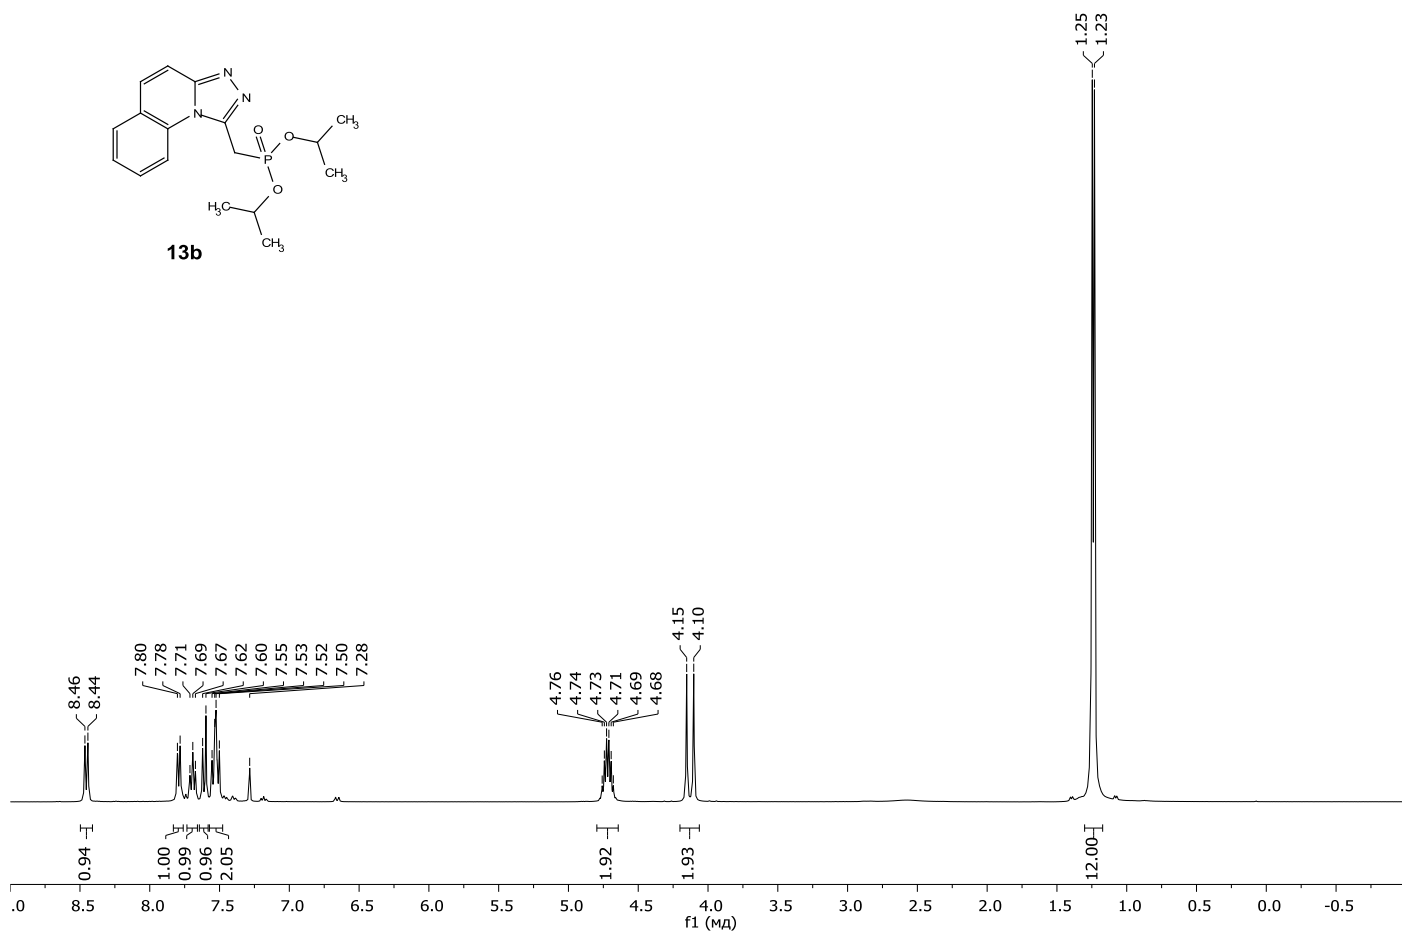

$^{13}\text{C}$ , 1D, 100.63 Hz  
 $\text{CDCl}_3$

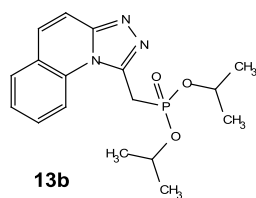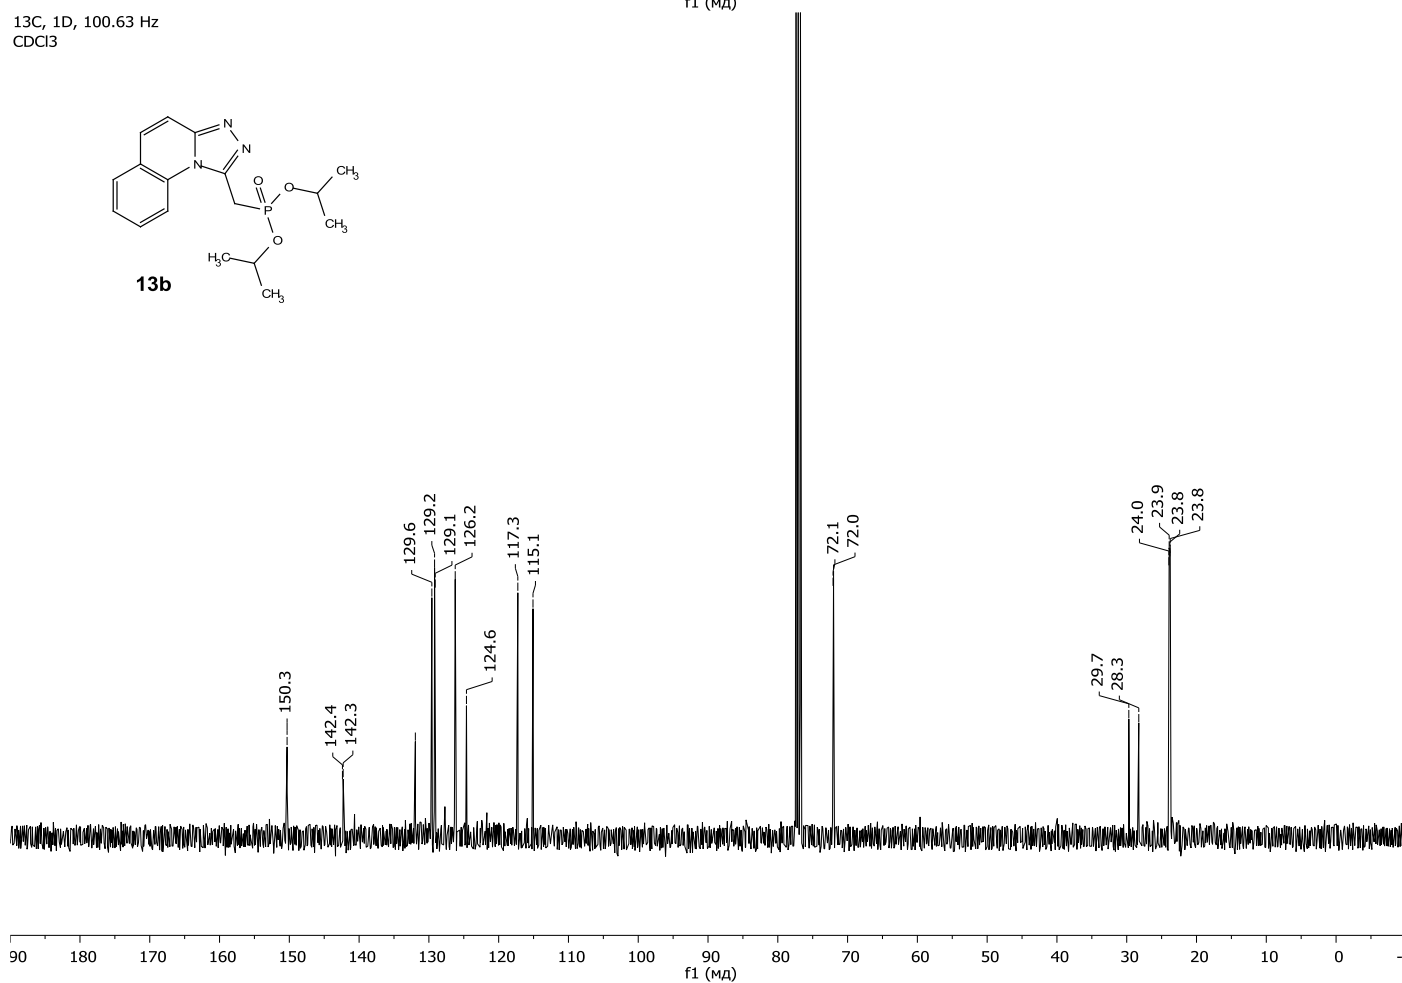

<sup>31</sup>P, 1D, 162.01 Hz  
CDCl<sub>3</sub>

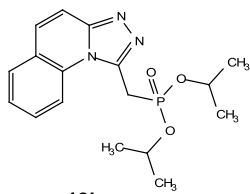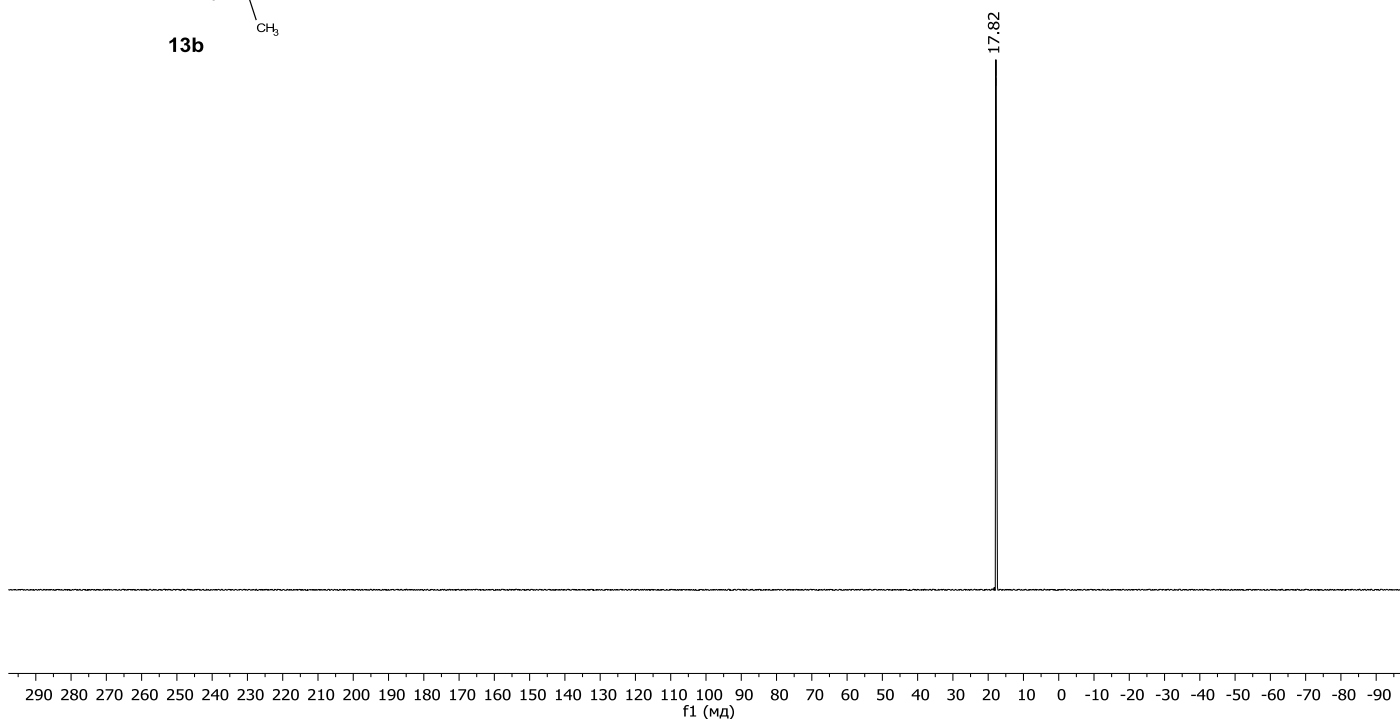

<sup>1</sup>H, 1D, 400.17 Hz  
CDCl<sub>3</sub>

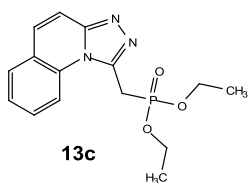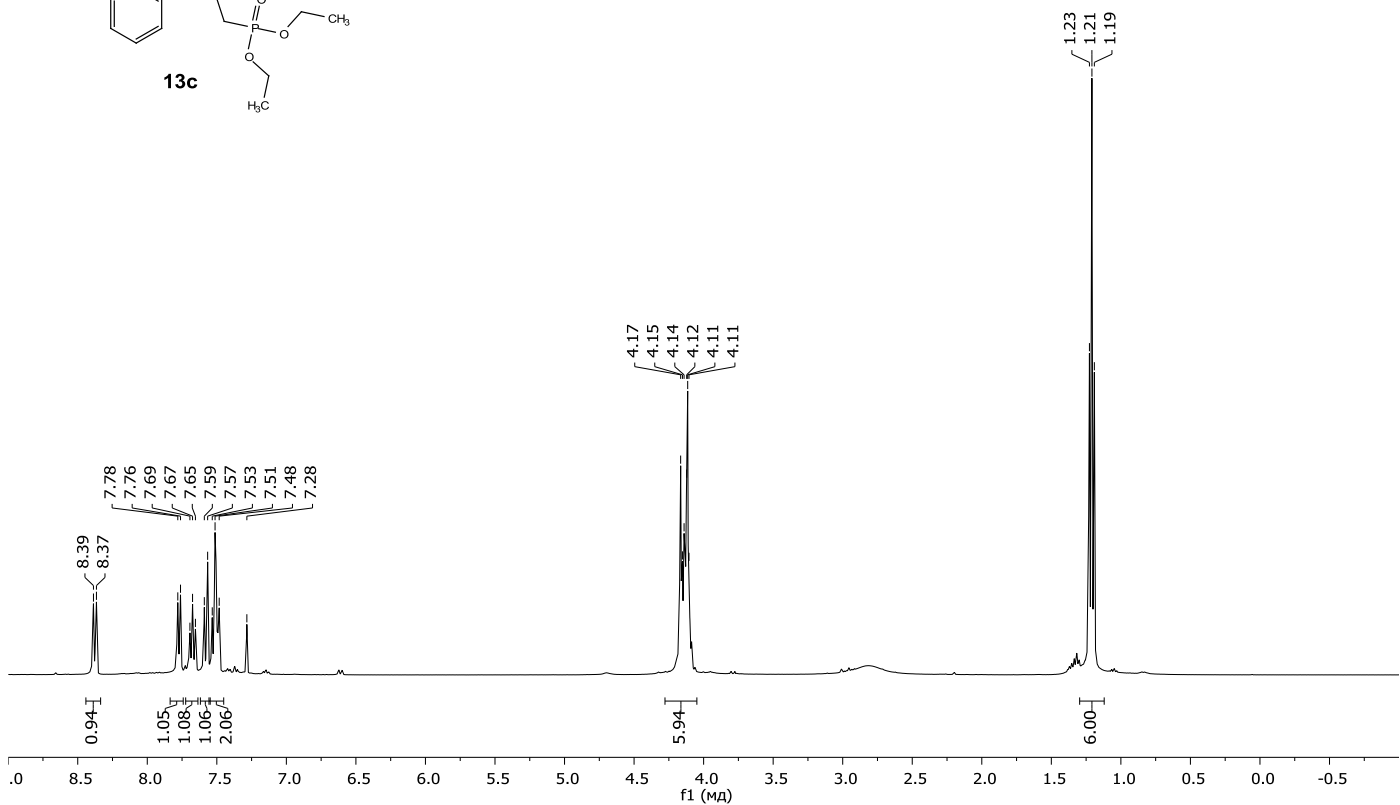

<sup>13</sup>C, 1D, 100.63 Hz  
CDCl<sub>3</sub>

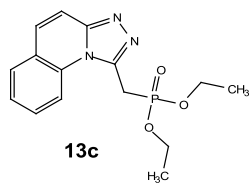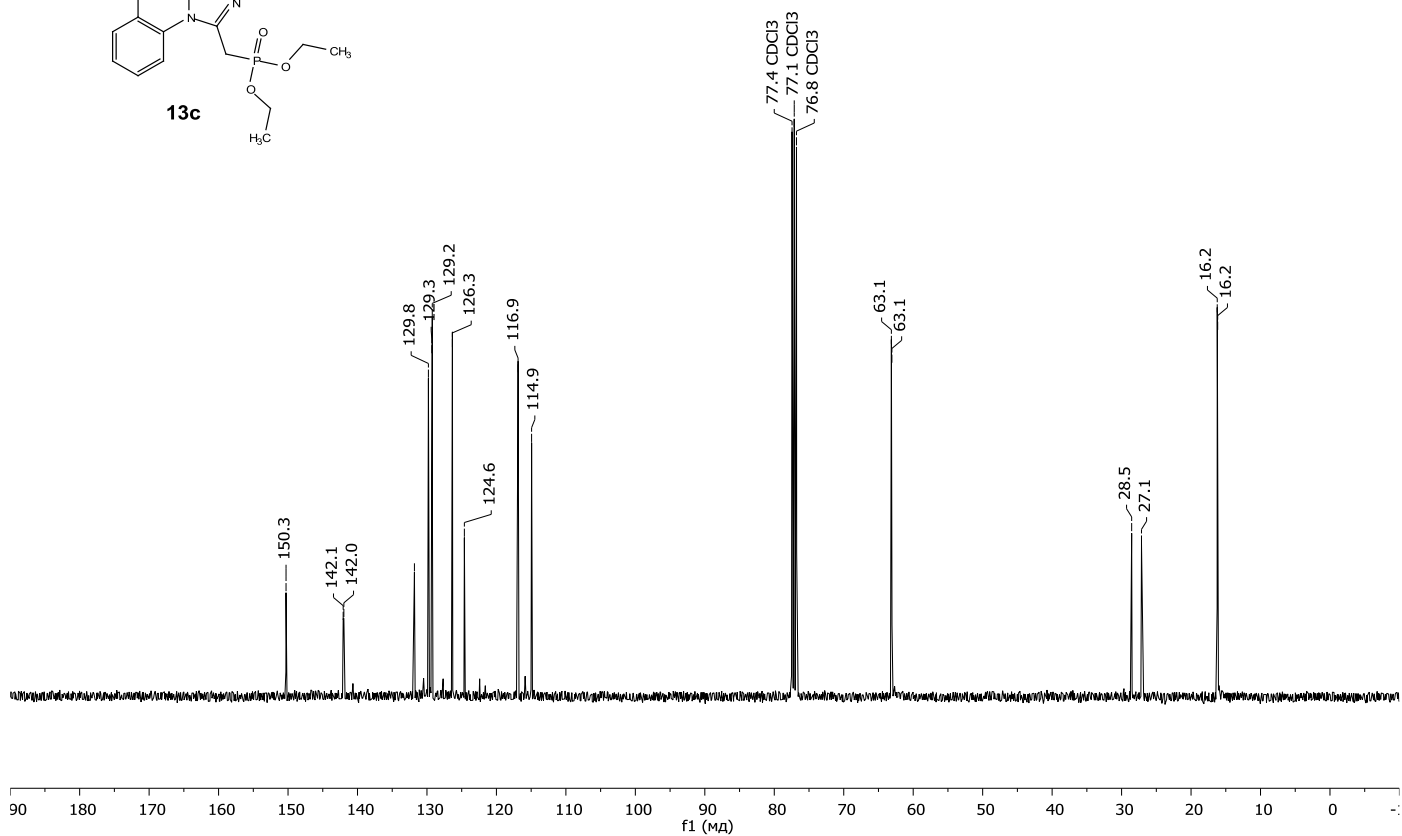

<sup>31</sup>P, 1D, 162.01 Hz  
CDCl<sub>3</sub>

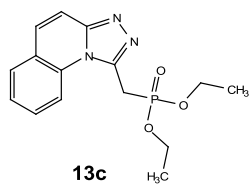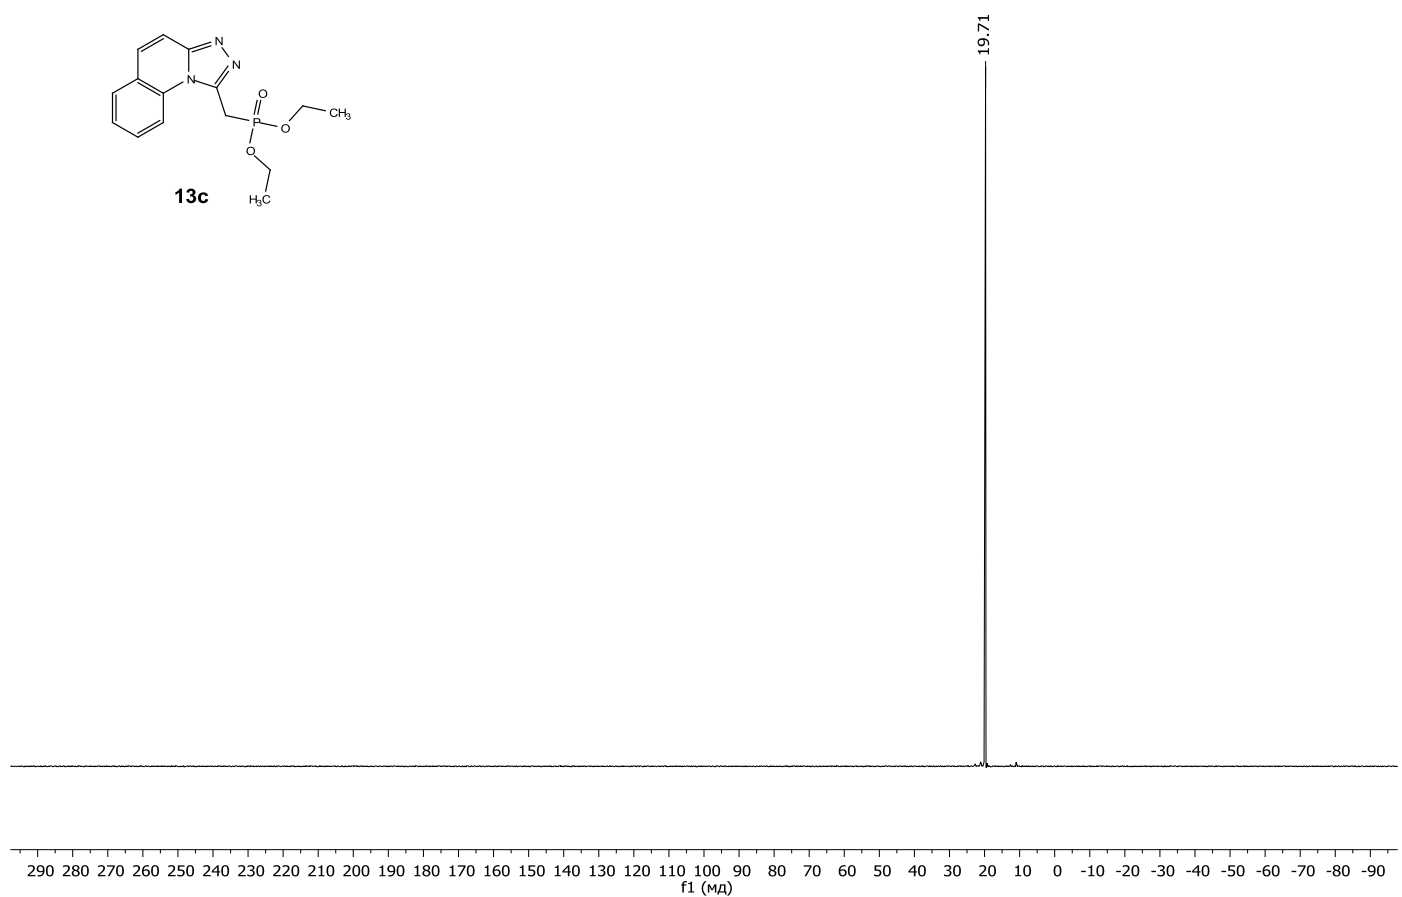

<sup>1</sup>H, 1D, 400.17 Hz  
CDCl<sub>3</sub>

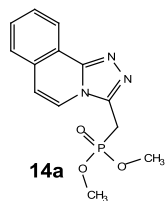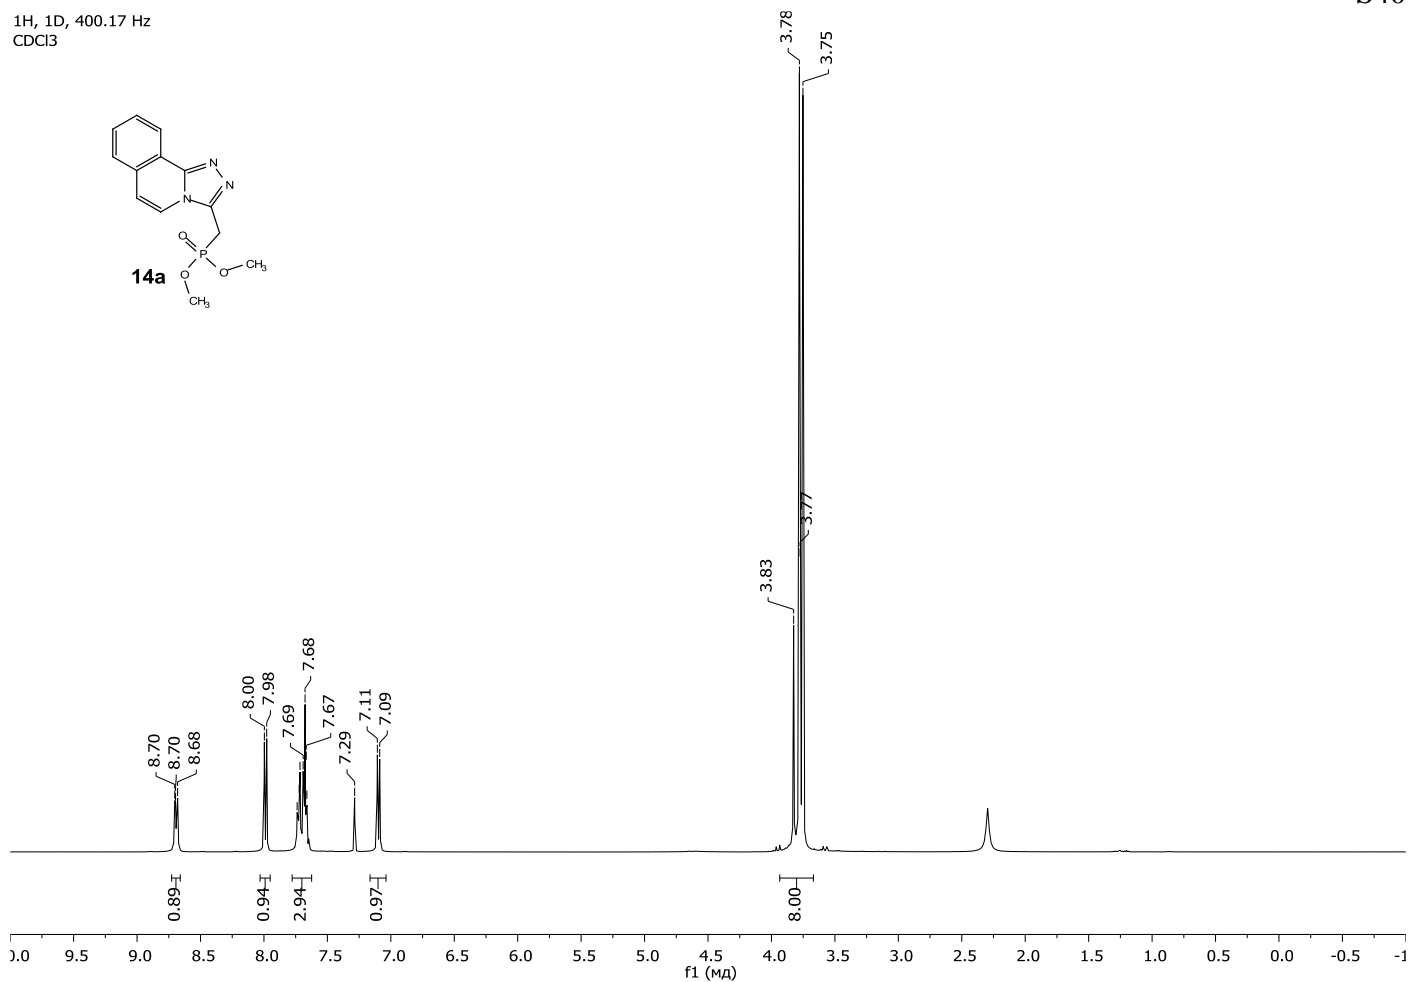

<sup>13</sup>C, 1D, 100.63 Hz  
CDCl<sub>3</sub>

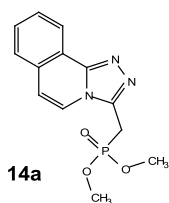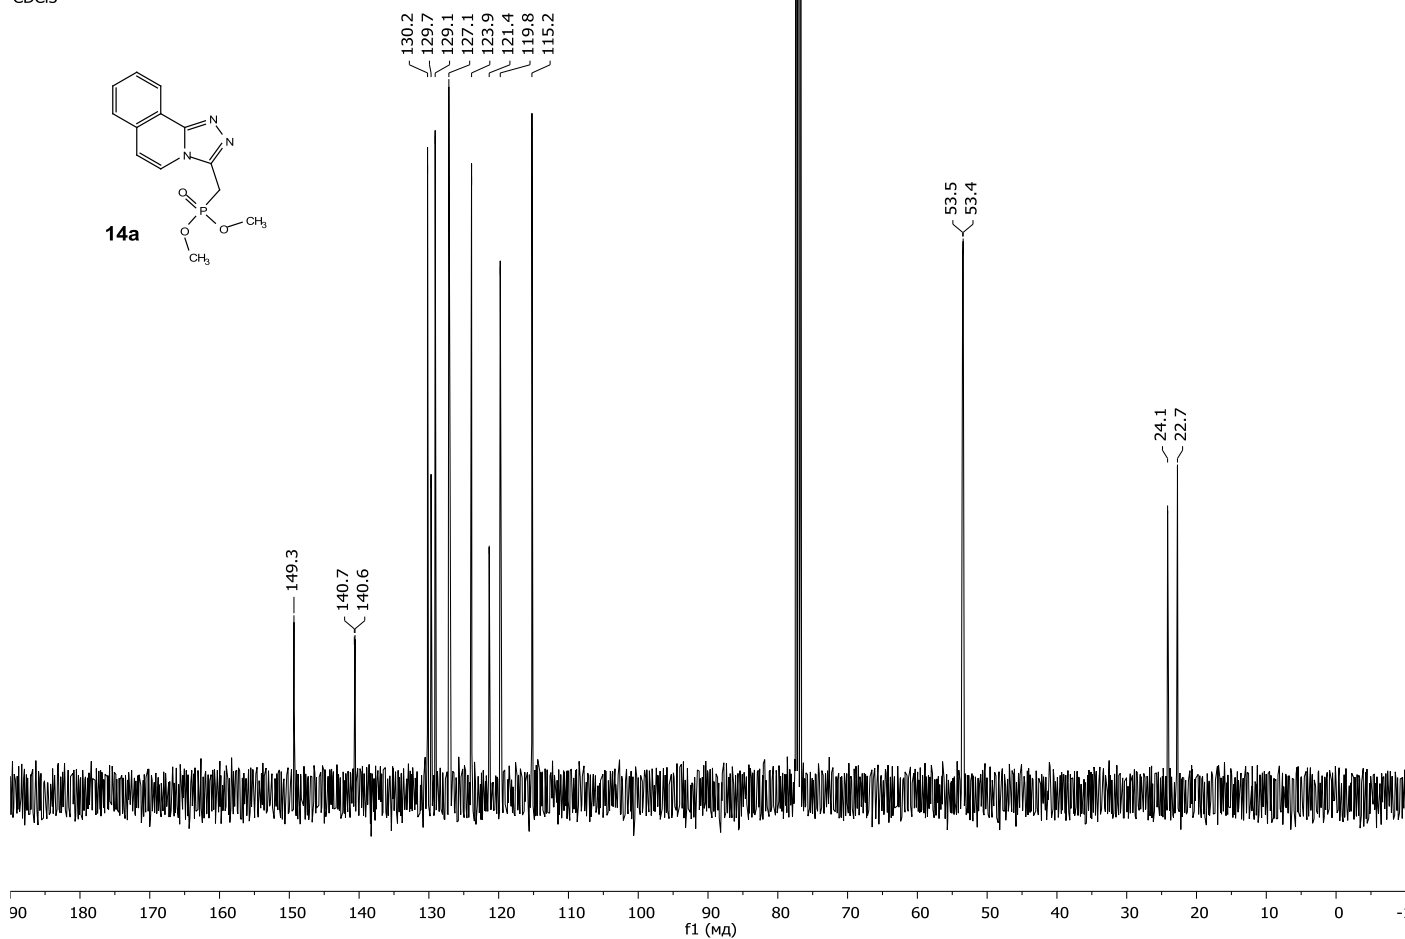

<sup>31</sup>P, 1D, 162.01 Hz  
CDCl<sub>3</sub>

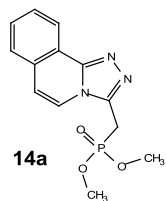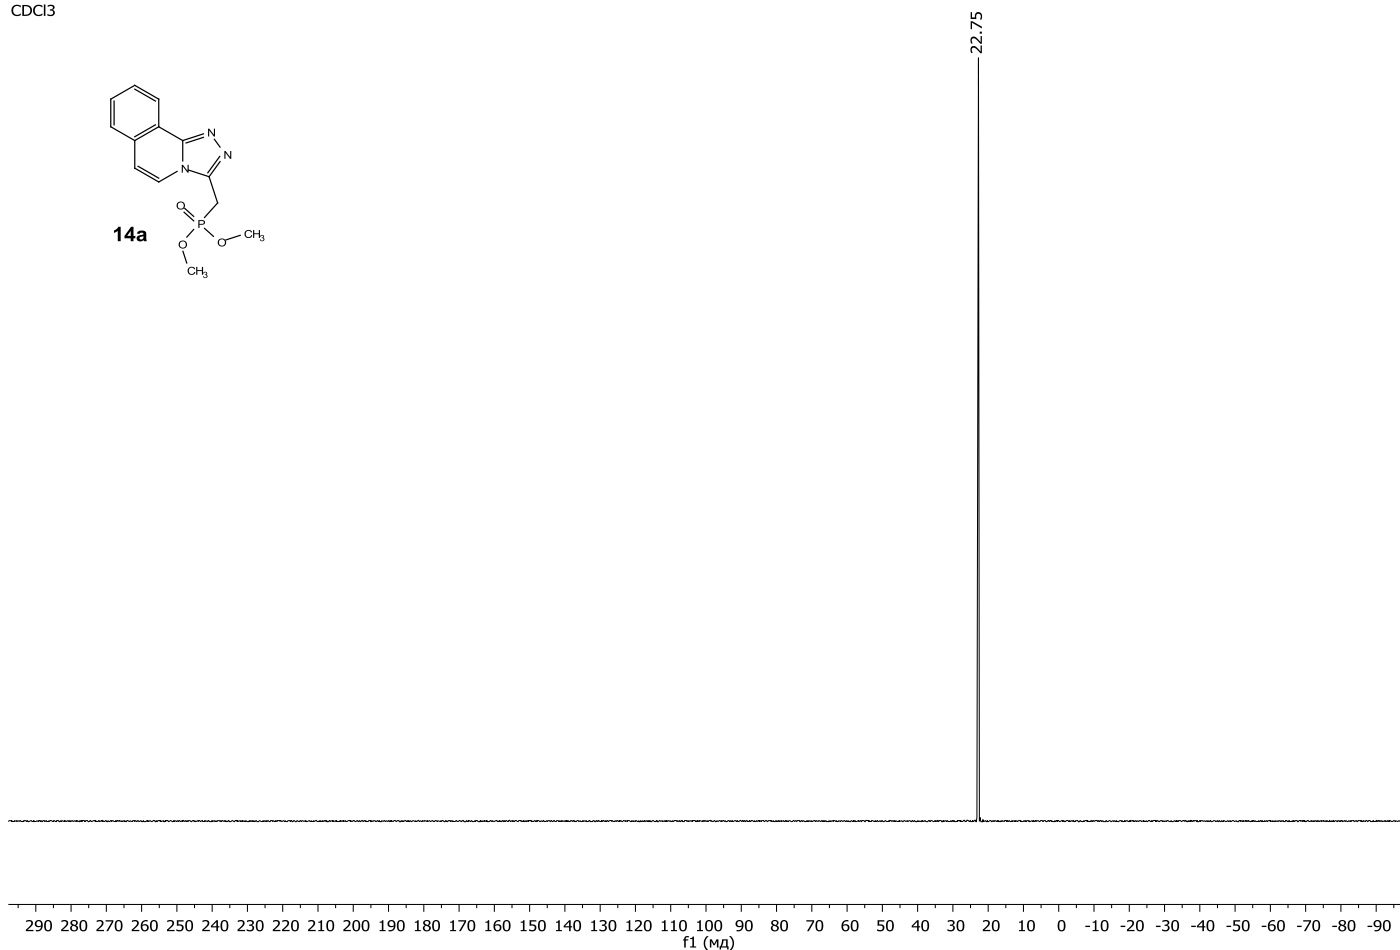

<sup>1</sup>H, 1D, 400.17 Hz  
CDCl<sub>3</sub>

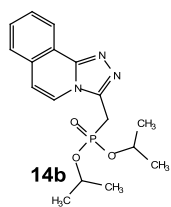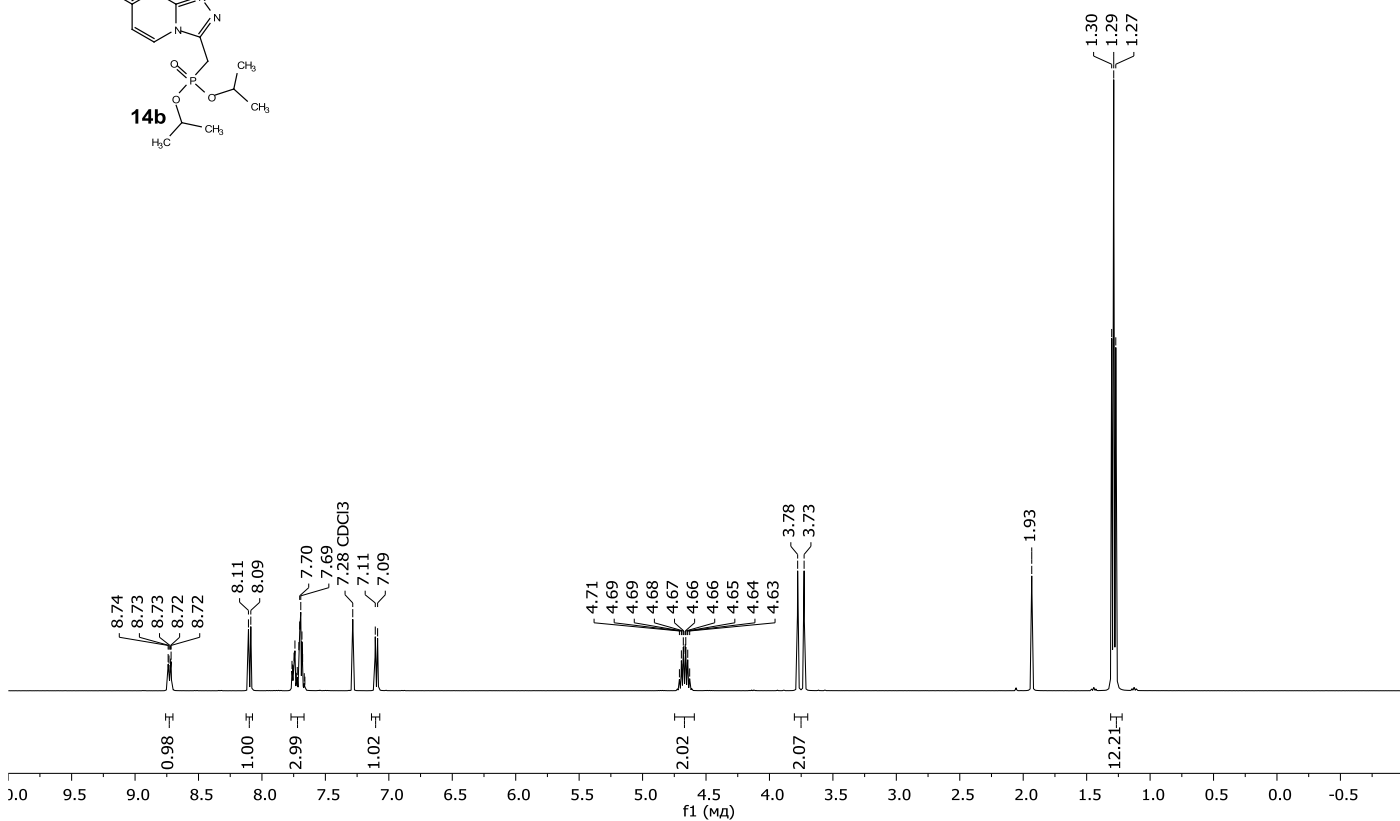

$^{13}\text{C}$ , 1D, 100.63 Hz  
 $\text{CDCl}_3$

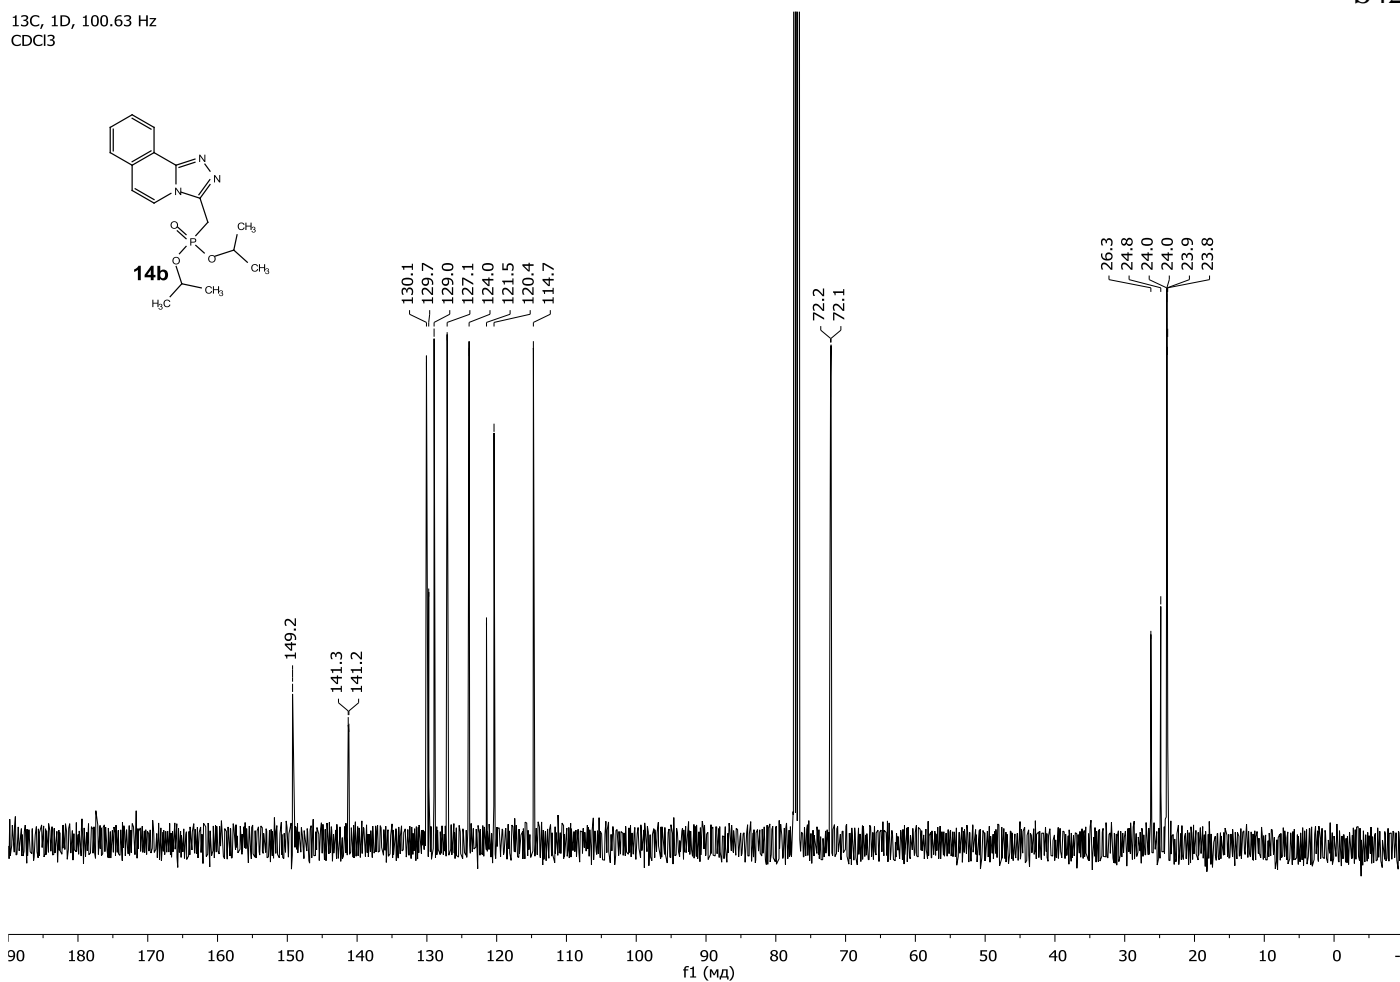

$^{31}\text{P}$ , 1D, 162.01 Hz  
DMSO

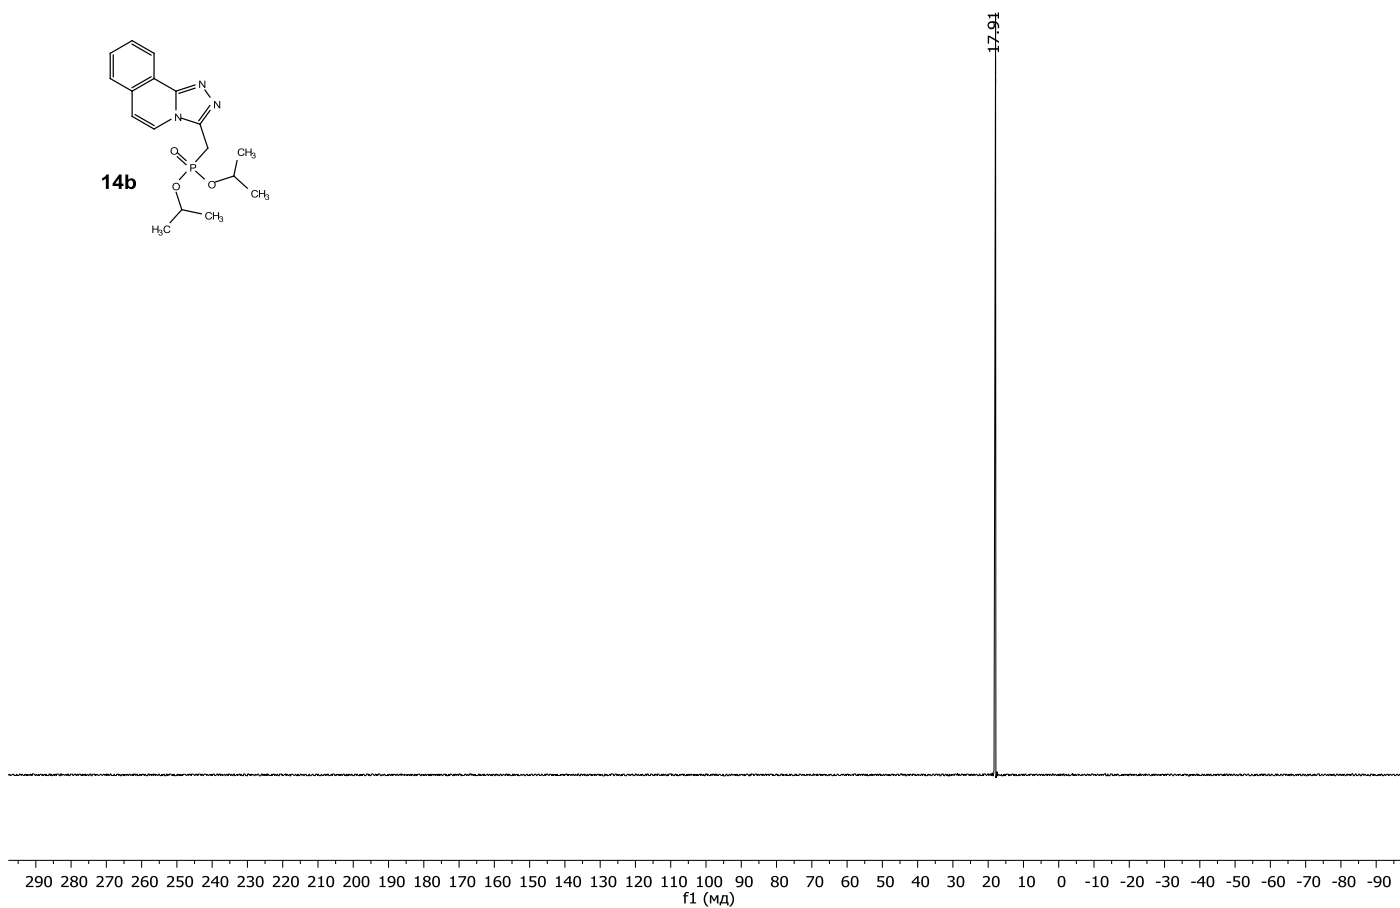

$^1\text{H}$ , 1D, 400.17 Hz  
 $\text{CDCl}_3$

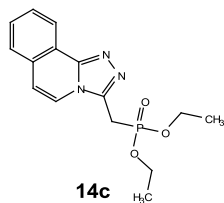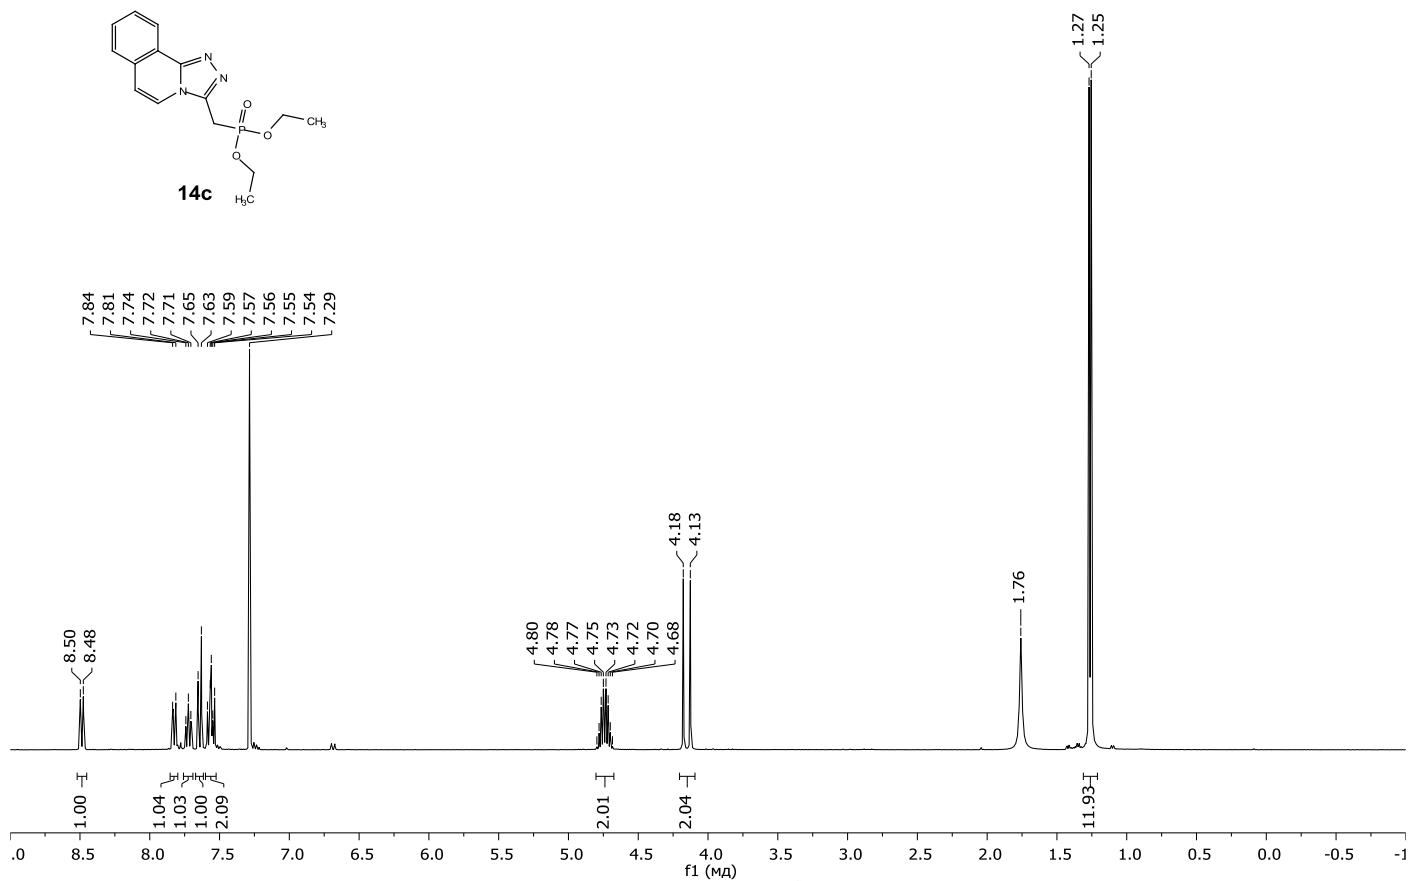

$^{13}\text{C}$ , 1D, 100.63 Hz  
 $\text{CDCl}_3$

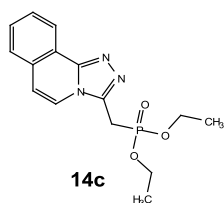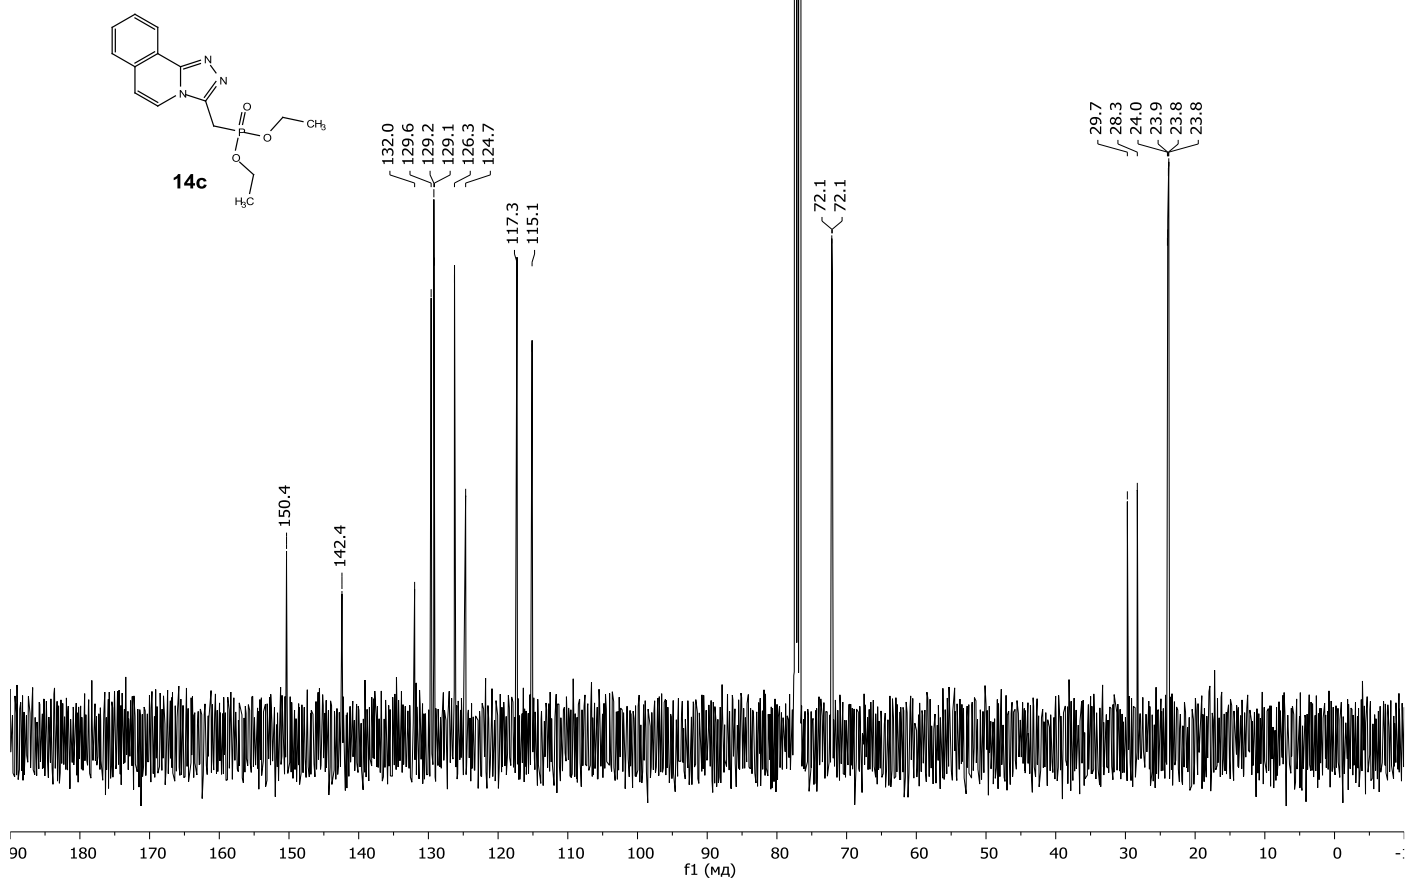

$^{31}\text{P}$ , 1D, 162.01 Hz  
 $\text{CDCl}_3$

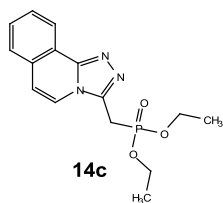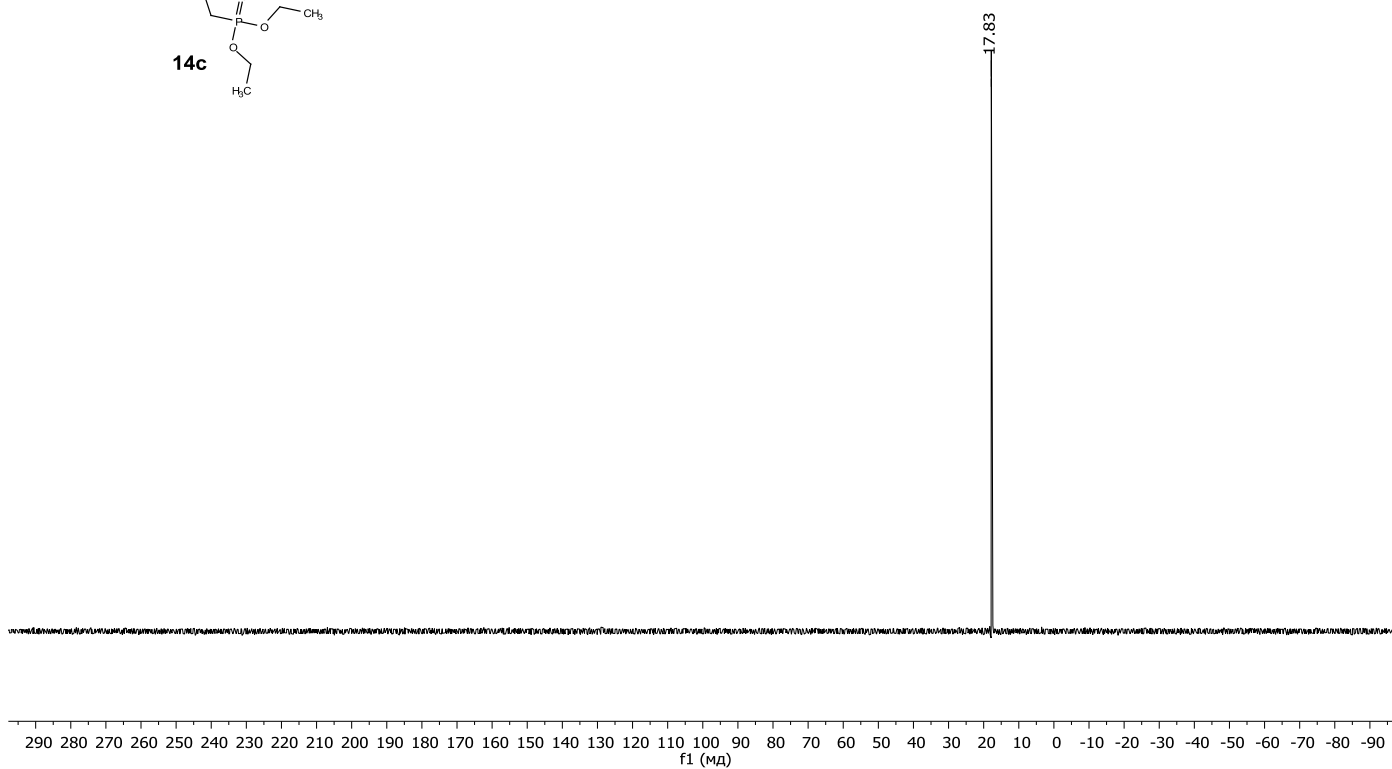

Supplement: Additional file 1 [file 1860-5397-15-159-S1.pdf]
